# Supplementary material for: Maternal Serum and Placental Metabolomes in Association with Prenatal Phthalate Exposure and Neurodevelopmental Outcomes in the MARBLES Cohort
Source: MDPI journal article supplement (doi:10.3390/metabo12090829), 2022-09-02
Supplement: s1 [file s1]

## **Supplementary Materials: The maternal serum and placental metabolomes in association with prenatal phthalate exposure and neurodevelopmental outcomes in the MARBLES cohort**

### **AUTHORS**

Mariana Parenti<sup>1</sup>, Rebecca J. Schmidt<sup>2,3</sup>, Sally Ozonoff<sup>3,4</sup>, Hyeong-Moo Shin<sup>5</sup>, Daniel J. Tancredi<sup>6</sup>, Paula Krakowiak<sup>2</sup>, Irva Hertz-Picciotto<sup>2,3</sup>, Cheryl K. Walker<sup>3,7</sup>, and Carolyn M. Slupsky<sup>1,8</sup>

<sup>1</sup> Department of Nutrition, University of California, Davis, 95616, CA, USA

<sup>2</sup> Department of Public Health Sciences, University of California, Davis, 95616, CA, USA

<sup>3</sup> Medical Investigation of Neurodevelopmental Disorders (MIND) Institute, University of California, Davis, 95616, CA, USA

<sup>4</sup> Department of Psychiatry and Behavioral Sciences, University of California, Davis, 95616, CA, USA

<sup>5</sup> Department of Environmental Science, Baylor University, Waco, 76798, TX, USA

<sup>6</sup> Department of Pediatrics, School of Medicine, University of California, Davis, 95616, CA, USA

<sup>7</sup> Department of Obstetrics & Gynecology, School of Medicine, University of California, Davis, 95616, CA, USA

<sup>8</sup> Department of Food Science and Technology, University of California, Davis, 95616, CA, USA

### **FIGURES AND TABLES**

**Table S1.** Distribution of phthalate metabolite concentrations

**Table S2.** Estimates of the total and direct effects of each phthalate metabolite on each serum metabolite

**Table S3.** Estimates of the total and direct effects the phthalate mixture on each serum metabolite

**Table S4.** Associations between the serum metabolome and neurodevelopmental outcome stratified by sex

**Table S5.** Associations between serum metabolites and neurodevelopmental outcome

**Table S6.** Estimates of the total and direct effects of each phthalate metabolite on each placenta metabolite

**Table S7.** Associations between placenta metabolites and birth year

**Table S8.** Associations between placenta metabolites and neurodevelopmental outcome overall and stratified by sex

**Figure S1.** Correlation heatmap between placental and serum metabolites

**Figure S2.** Directed acyclic graphs (DAGs) for the association between phthalate exposure, serum metabolome, and neurodevelopmental outcome

**Figure S3.** Directed acyclic graph (DAG) for the association between phthalate exposure, placenta metabolome, and neurodevelopmental outcome

**Table S1:** Distribution of urinary phthalate metabolite concentrations ( $\mu\text{g/L}$ ) and the molar sum of DEHP metabolites ( $\Sigma\text{DEHP} = \text{MEHP} + \text{MEHHP} + \text{MEOHP} + \text{MECPP}$ ,  $\mu\text{mol/L}$ ). LOD = Limit of detection ( $\mu\text{g/L}$ ).

|                     | Serum       |            |      |      |       | Placenta    |      |      |       |
|---------------------|-------------|------------|------|------|-------|-------------|------|------|-------|
|                     | Percentiles |            |      |      |       | Percentiles |      |      |       |
|                     | LOD         | % Detected | 5    | 50   | 95    | % Detected  | 5    | 50   | 95    |
| MEP                 | 1.2         | 100        | 6.5  | 24.4 | 122.5 | 100         | 6.6  | 28.4 | 277.3 |
| MiBP                | 0.8         | 100        | 2.7  | 7.6  | 26.8  | 100         | 3.2  | 7.8  | 27.5  |
| MHiBP               | 0.4         | 100        | 1.0  | 2.7  | 8.7   | 100         | 1.0  | 2.7  | 8.4   |
| MBP                 | 0.4         | 100        | 5.3  | 12.1 | 32.4  | 100         | 5.6  | 12.6 | 34.4  |
| MHBP                | 0.4         | 94         | 0.4  | 1.1  | 2.7   | 96          | 0.5  | 1.1  | 2.7   |
| MBzP                | 0.3         | 100        | 1.6  | 6.8  | 34.1  | 100         | 1.9  | 6.7  | 41.0  |
| MEHP                | 0.8         | 89         | <LOD | 2.9  | 19.1  | 93          | <LOD | 3.3  | 25.5  |
| MEHHP               | 0.4         | 100        | 4.0  | 11.6 | 73.0  | 100         | 4.4  | 13.2 | 110.4 |
| MEOHP               | 0.2         | 100        | 3.2  | 8.6  | 54.4  | 100         | 3.2  | 10.7 | 70.1  |
| MECPP               | 0.4         | 100        | 7.2  | 19.5 | 98.8  | 100         | 8.1  | 25.0 | 137.4 |
| MCCP                | 0.4         | 98         | 0.7  | 2.3  | 13.5  | 98          | 0.8  | 2.2  | 13.6  |
| MNP                 | 0.9         | 76         | <LOD | 1.5  | 11.1  | 79          | <LOD | 1.5  | 7.5   |
| MCOP                | 0.3         | 100        | 5.2  | 21.0 | 147.2 | 100         | 4.9  | 21.1 | 118.8 |
| MCNP                | 0.2         | 100        | 1.2  | 3.4  | 19.6  | 100         | 1.1  | 3.4  | 18.7  |
| $\Sigma\text{DEHP}$ |             |            | 0.1  | 0.1  | 0.8   |             | 0.1  | 0.2  | 1.2   |

**Table S2:** Estimates of the total and direct effects of each phthalate metabolite on each serum metabolite. The estimated effect of each phthalate metabolite on each serum metabolite was modeled using multiple linear regression and the estimated coefficients and 95% confidence intervals (CI) are reported. The total effect was adjusted for birth year, fasted time, gestational age at sample collection, homeownership, maternal education, and maternal race/ethnicity. The direct effect models were adjusted for birth year, birth year, fasted time, gestational age at serum collection, homeownership, maternal metabolic condition, and maternal race/ethnicity. All *p*-values were adjusted for false discovery rate (FDR) and both the original and FDR *p*-values are reported.

| Phthalate | Metabolite                   | Total Effect               |          |              | Direct Effect              |          |              |
|-----------|------------------------------|----------------------------|----------|--------------|----------------------------|----------|--------------|
|           |                              | Estimate (95% CI)          | <i>p</i> | FDR <i>p</i> | Estimate (95% CI)          | <i>p</i> | FDR <i>p</i> |
| MBP       | 2-Hydroxybutyrate            | -0.0270 (-0.1821, 0.1282)  | 0.7309   | 0.9701       | -0.0026 (-0.1600, 0.1548)  | 0.9738   | 0.9999       |
| MBP       | 2-Hydroxyisobutyrate         | -0.0395 (-0.1178, 0.0388)  | 0.3196   | 0.9330       | -0.0291 (-0.1095, 0.0513)  | 0.4743   | 0.9999       |
| MBP       | 2-Hydroxyisovalerate         | -0.0260 (-0.1145, 0.0624)  | 0.5603   | 0.9556       | -0.0201 (-0.1086, 0.0685)  | 0.6539   | 0.9999       |
| MBP       | 2-Oxoglutarate               | -0.0134 (-0.1089, 0.0822)  | 0.7818   | 0.9701       | -0.0039 (-0.0985, 0.0907)  | 0.9348   | 0.9999       |
| MBP       | 2-Oxoisocaproate             | -0.0865 (-0.1865, 0.0135)  | 0.0892   | 0.9330       | -0.0735 (-0.1758, 0.0288)  | 0.1573   | 0.9999       |
| MBP       | 3-Hydroxybutyrate            | -0.0813 (-0.3479, 0.1853)  | 0.5463   | 0.9556       | -0.0859 (-0.3449, 0.1730)  | 0.5117   | 0.9999       |
| MBP       | 3-Hydroxyisobutyrate         | -0.0617 (-0.1946, 0.0713)  | 0.3598   | 0.9330       | -0.0655 (-0.1888, 0.0578)  | 0.2945   | 0.9999       |
| MBP       | 3-Hydroxyisovalerate         | -0.0399 (-0.1184, 0.0385)  | 0.3150   | 0.9330       | -0.0333 (-0.1104, 0.0437)  | 0.3922   | 0.9999       |
| MBP       | 3-Methyl-2-oxo-butanoic acid | -0.0791 (-0.1554, -0.0028) | 0.0423   | 0.9330       | -0.0674 (-0.1462, 0.0115)  | 0.0932   | 0.9999       |
| MBP       | Acetate                      | -0.0971 (-0.2292, 0.0350)  | 0.1480   | 0.9330       | -0.0895 (-0.2211, 0.0421)  | 0.1803   | 0.9999       |
| MBP       | Acetoacetate                 | -0.0657 (-0.2626, 0.1311)  | 0.5092   | 0.9556       | -0.0657 (-0.2620, 0.1307)  | 0.5085   | 0.9999       |
| MBP       | Acetone                      | -0.0227 (-0.1680, 0.1225)  | 0.7567   | 0.9701       | -0.0245 (-0.1660, 0.1171)  | 0.7323   | 0.9999       |
| MBP       | Alanine                      | -0.0330 (-0.1021, 0.0361)  | 0.3458   | 0.9330       | -0.0378 (-0.1067, 0.0310)  | 0.2776   | 0.9999       |
| MBP       | Arginine                     | -0.0678 (-0.1681, 0.0326)  | 0.1832   | 0.9330       | -0.0655 (-0.1668, 0.0358)  | 0.2026   | 0.9999       |
| MBP       | Asparagine                   | -0.0396 (-0.1361, 0.0570)  | 0.4182   | 0.9462       | -0.0353 (-0.1283, 0.0576)  | 0.4522   | 0.9999       |
| MBP       | Aspartate                    | -0.0132 (-0.1579, 0.1314)  | 0.8562   | 0.9701       | -0.0330 (-0.1718, 0.1058)  | 0.6380   | 0.9999       |
| MBP       | Betaine                      | -0.0160 (-0.0949, 0.0628)  | 0.6871   | 0.9701       | -0.0012 (-0.0829, 0.0805)  | 0.9767   | 0.9999       |
| MBP       | Carnitine                    | -0.0363 (-0.1169, 0.0444)  | 0.3747   | 0.9330       | -0.0328 (-0.1142, 0.0486)  | 0.4255   | 0.9999       |
| MBP       | Choline                      | -0.0383 (-0.1282, 0.0517)  | 0.4009   | 0.9389       | -0.0294 (-0.1192, 0.0603)  | 0.5165   | 0.9999       |
| MBP       | Citrate                      | -0.0004 (-0.0882, 0.0874)  | 0.9929   | 0.9964       | 0.0144 (-0.0702, 0.0991)   | 0.7357   | 0.9999       |
| MBP       | Creatine                     | -0.0085 (-0.1507, 0.1336)  | 0.9055   | 0.9782       | -0.0073 (-0.1482, 0.1336)  | 0.9181   | 0.9999       |
| MBP       | Creatinine                   | -0.0205 (-0.0887, 0.0478)  | 0.5533   | 0.9556       | -0.0151 (-0.0838, 0.0536)  | 0.6634   | 0.9999       |
| MBP       | Cystine                      | -0.0039 (-0.1260, 0.1181)  | 0.9490   | 0.9901       | 0.0137 (-0.1111, 0.1384)   | 0.8283   | 0.9999       |
| MBP       | Dimethyl sulfone             | -0.0582 (-0.2092, 0.0928)  | 0.4460   | 0.9556       | -0.0605 (-0.2034, 0.0825)  | 0.4033   | 0.9999       |
| MBP       | Formate                      | -0.0761 (-0.1567, 0.0044)  | 0.0636   | 0.9330       | -0.0763 (-0.1562, 0.0037)  | 0.0612   | 0.9999       |
| MBP       | Glucose                      | -0.0366 (-0.1221, 0.0489)  | 0.3974   | 0.9389       | -0.0346 (-0.1200, 0.0508)  | 0.4233   | 0.9999       |
| MBP       | Glutamate                    | -0.0112 (-0.1538, 0.1314)  | 0.8763   | 0.9702       | -0.0186 (-0.1598, 0.1227)  | 0.7946   | 0.9999       |
| MBP       | Glutamine                    | -0.0668 (-0.1231, -0.0105) | 0.0206   | 0.9330       | -0.0662 (-0.1230, -0.0093) | 0.0230   | 0.9999       |
| MBP       | Glycine                      | -0.0504 (-0.1376, 0.0368)  | 0.2541   | 0.9330       | -0.0508 (-0.1379, 0.0364)  | 0.2506   | 0.9999       |
| MBP       | Isoleucine                   | -0.0613 (-0.1732, 0.0506)  | 0.2799   | 0.9330       | -0.0662 (-0.1775, 0.0450)  | 0.2402   | 0.9999       |
| MBP       | Lactate                      | 0.0368 (-0.0624, 0.1359)   | 0.4636   | 0.9556       | 0.0324 (-0.0658, 0.1305)   | 0.5141   | 0.9999       |
| MBP       | Leucine                      | -0.0640 (-0.1595, 0.0315)  | 0.1867   | 0.9330       | -0.0691 (-0.1630, 0.0247)  | 0.1469   | 0.9999       |
| MBP       | Lysine                       | -0.0257 (-0.1229, 0.0716)  | 0.6015   | 0.9623       | -0.0323 (-0.1287, 0.0642)  | 0.5082   | 0.9999       |
| MBP       | Methanol                     | -0.2814 (-0.4931, -0.0697) | 0.0097   | 0.9330       | -0.2764 (-0.4869, -0.0660) | 0.0106   | 0.9999       |
| MBP       | Methionine                   | -0.0547 (-0.1478, 0.0383)  | 0.2460   | 0.9330       | -0.0592 (-0.1510, 0.0325)  | 0.2029   | 0.9999       |
| MBP       | myo-Inositol                 | -0.0232 (-0.1074, 0.0611)  | 0.5862   | 0.9556       | -0.0178 (-0.1033, 0.0677)  | 0.6803   | 0.9999       |
| MBP       | N,N-Dimethylglycine          | -0.0585 (-0.1344, 0.0174)  | 0.1296   | 0.9330       | -0.0486 (-0.1258, 0.0287)  | 0.2152   | 0.9999       |
| MBP       | O-Acetylcarnitine            | -0.0067 (-0.0904, 0.0769)  | 0.8734   | 0.9701       | -0.0010 (-0.0833, 0.0814)  | 0.9812   | 0.9999       |
| MBP       | Ornithine                    | -0.0439 (-0.1668, 0.0789)  | 0.4797   | 0.9556       | -0.0584 (-0.1776, 0.0609)  | 0.3336   | 0.9999       |
| MBP       | Phenylalanine                | -0.0459 (-0.1269, 0.0352)  | 0.2641   | 0.9330       | -0.0494 (-0.1297, 0.0310)  | 0.2259   | 0.9999       |
| MBP       | Proline                      | 0.0141 (-0.0834, 0.1115)   | 0.7754   | 0.9701       | 0.0107 (-0.0867, 0.1080)   | 0.8282   | 0.9999       |
| MBP       | Pyruvate                     | 0.0151 (-0.1615, 0.1918)   | 0.8653   | 0.9701       | 0.0003 (-0.1722, 0.1728)   | 0.9971   | 0.9999       |
| MBP       | Serine                       | -0.0425 (-0.1294, 0.0444)  | 0.3342   | 0.9330       | -0.0502 (-0.1340, 0.0335)  | 0.2368   | 0.9999       |
| MBP       | Taurine                      | 0.0888 (-0.0672, 0.2448)   | 0.2614   | 0.9330       | 0.0708 (-0.0791, 0.2207)   | 0.3509   | 0.9999       |
| MBP       | Threonine                    | -0.0401 (-0.1773, 0.0972)  | 0.5639   | 0.9556       | -0.0373 (-0.1754, 0.1008)  | 0.5934   | 0.9999       |
| MBP       | Tyrosine                     | -0.0439 (-0.1409, 0.0530)  | 0.3708   | 0.9330       | -0.0471 (-0.1419, 0.0477)  | 0.3262   | 0.9999       |
| MBP       | Urea                         | -0.0231 (-0.1396, 0.0934)  | 0.6948   | 0.9701       | -0.0131 (-0.1251, 0.0989)  | 0.8163   | 0.9999       |
| MBP       | Valine                       | -0.0416 (-0.1304, 0.0473)  | 0.3558   | 0.9330       | -0.0446 (-0.1322, 0.0430)  | 0.3146   | 0.9999       |
| MBzP      | 2-Hydroxybutyrate            | 0.0178 (-0.0846, 0.1201)   | 0.7311   | 0.9701       | -0.0153 (-0.1206, 0.0900)  | 0.7736   | 0.9999       |
| MBzP      | 2-Hydroxyisobutyrate         | 0.0331 (-0.0183, 0.0846)   | 0.2045   | 0.9330       | 0.0198 (-0.0340, 0.0736)   | 0.4667   | 0.9999       |
| MBzP      | 2-Hydroxyisovalerate         | 0.0268 (-0.0315, 0.0850)   | 0.3639   | 0.9330       | 0.0166 (-0.0427, 0.0758)   | 0.5795   | 0.9999       |

| Phthalate | Metabolite                   | Total Effect               |        |        | Direct Effect              |        |        |
|-----------|------------------------------|----------------------------|--------|--------|----------------------------|--------|--------|
|           |                              | Estimate (95% CI)          | p      | FDR p  | Estimate (95% CI)          | p      | FDR p  |
| MBzP      | 2-Oxoglutarate               | 0.0143 (-0.0487, 0.0773)   | 0.6533 | 0.9701 | -0.0033 (-0.0666, 0.0600)  | 0.9181 | 0.9999 |
| MBzP      | 2-Oxoisocaproate             | 0.0112 (-0.0557, 0.0781)   | 0.7408 | 0.9701 | -0.0068 (-0.0760, 0.0624)  | 0.8453 | 0.9999 |
| MBzP      | 3-Hydroxybutyrate            | 0.0457 (-0.1302, 0.2217)   | 0.6072 | 0.9623 | -0.0127 (-0.1864, 0.1610)  | 0.8847 | 0.9999 |
| MBzP      | 3-Hydroxyisobutyrate         | -0.0324 (-0.1202, 0.0555)  | 0.4664 | 0.9556 | -0.0474 (-0.1299, 0.0351)  | 0.2568 | 0.9999 |
| MBzP      | 3-Hydroxyisovalerate         | -0.0031 (-0.0551, 0.0490)  | 0.9075 | 0.9785 | -0.0179 (-0.0695, 0.0337)  | 0.4925 | 0.9999 |
| MBzP      | 3-Methyl-2-oxo-butanoic acid | -0.0101 (-0.0615, 0.0412)  | 0.6966 | 0.9701 | -0.0208 (-0.0742, 0.0326)  | 0.4421 | 0.9999 |
| MBzP      | Acetate                      | -0.0864 (-0.1728, -0.0001) | 0.0498 | 0.9330 | -0.0644 (-0.1523, 0.0236)  | 0.1496 | 0.9999 |
| MBzP      | Acetoacetate                 | 0.0217 (-0.1084, 0.1518)   | 0.7412 | 0.9701 | -0.0072 (-0.1389, 0.1246)  | 0.9144 | 0.9999 |
| MBzP      | Acetone                      | -0.0169 (-0.1127, 0.0789)  | 0.7277 | 0.9701 | -0.0353 (-0.1299, 0.0592)  | 0.4601 | 0.9999 |
| MBzP      | Alanine                      | -0.0146 (-0.0603, 0.0312)  | 0.5290 | 0.9556 | -0.0037 (-0.0500, 0.0426)  | 0.8741 | 0.9999 |
| MBzP      | Arginine                     | 0.0136 (-0.0531, 0.0803)   | 0.6868 | 0.9701 | 0.0019 (-0.0665, 0.0702)   | 0.9573 | 0.9999 |
| MBzP      | Asparagine                   | -0.0398 (-0.1032, 0.0236)  | 0.2161 | 0.9330 | -0.0265 (-0.0887, 0.0356)  | 0.3991 | 0.9999 |
| MBzP      | Aspartate                    | -0.0149 (-0.1103, 0.0805)  | 0.7573 | 0.9701 | -0.0289 (-0.1217, 0.0640)  | 0.5383 | 0.9999 |
| MBzP      | Betaine                      | -0.0088 (-0.0608, 0.0432)  | 0.7372 | 0.9701 | -0.0250 (-0.0795, 0.0295)  | 0.3646 | 0.9999 |
| MBzP      | Carnitine                    | -0.0092 (-0.0626, 0.0442)  | 0.7326 | 0.9701 | -0.0159 (-0.0705, 0.0387)  | 0.5643 | 0.9999 |
| MBzP      | Choline                      | -0.0011 (-0.0607, 0.0585)  | 0.9708 | 0.9924 | -0.0196 (-0.0797, 0.0405)  | 0.5185 | 0.9999 |
| MBzP      | Citrate                      | 0.0047 (-0.0532, 0.0626)   | 0.8725 | 0.9701 | -0.0103 (-0.0670, 0.0463)  | 0.7179 | 0.9999 |
| MBzP      | Creatine                     | 0.0122 (-0.0816, 0.1059)   | 0.7970 | 0.9701 | 0.0060 (-0.0883, 0.1003)   | 0.9000 | 0.9999 |
| MBzP      | Creatinine                   | -0.0312 (-0.0759, 0.0134)  | 0.1685 | 0.9330 | -0.0336 (-0.0792, 0.0119)  | 0.1457 | 0.9999 |
| MBzP      | Cystine                      | -0.0259 (-0.1062, 0.0545)  | 0.5246 | 0.9556 | -0.0329 (-0.1161, 0.0504)  | 0.4352 | 0.9999 |
| MBzP      | Dimethyl sulfone             | -0.0765 (-0.1753, 0.0222)  | 0.1270 | 0.9330 | -0.0487 (-0.1442, 0.0468)  | 0.3139 | 0.9999 |
| MBzP      | Formate                      | -0.0469 (-0.1001, 0.0064)  | 0.0838 | 0.9330 | -0.0392 (-0.0931, 0.0147)  | 0.1522 | 0.9999 |
| MBzP      | Glucose                      | -0.0472 (-0.1031, 0.0086)  | 0.0963 | 0.9330 | -0.0422 (-0.0989, 0.0145)  | 0.1427 | 0.9999 |
| MBzP      | Glutamate                    | -0.0135 (-0.1075, 0.0806)  | 0.7768 | 0.9701 | -0.0254 (-0.1199, 0.0690)  | 0.5941 | 0.9999 |
| MBzP      | Glutamine                    | -0.0143 (-0.0524, 0.0238)  | 0.4576 | 0.9556 | -0.0158 (-0.0547, 0.0232)  | 0.4236 | 0.9999 |
| MBzP      | Glycine                      | -0.0409 (-0.0983, 0.0164)  | 0.1596 | 0.9330 | -0.0393 (-0.0975, 0.0189)  | 0.1832 | 0.9999 |
| MBzP      | Isoleucine                   | 0.0056 (-0.0687, 0.0798)   | 0.8824 | 0.9737 | -0.0027 (-0.0777, 0.0723)  | 0.9425 | 0.9999 |
| MBzP      | Lactate                      | -0.0053 (-0.0709, 0.0602)  | 0.8722 | 0.9701 | 0.0003 (-0.0656, 0.0661)   | 0.9934 | 0.9999 |
| MBzP      | Leucine                      | 0.0001 (-0.0635, 0.0636)   | 0.9985 | 0.9985 | -0.0112 (-0.0746, 0.0523)  | 0.7280 | 0.9999 |
| MBzP      | Lysine                       | -0.0021 (-0.0663, 0.0622)  | 0.9487 | 0.9901 | -0.0173 (-0.0819, 0.0473)  | 0.5972 | 0.9999 |
| MBzP      | Methanol                     | -0.1938 (-0.3330, -0.0546) | 0.0069 | 0.9330 | -0.1871 (-0.3278, -0.0464) | 0.0097 | 0.9999 |
| MBzP      | Methionine                   | -0.0071 (-0.0688, 0.0547)  | 0.8213 | 0.9701 | -0.0030 (-0.0649, 0.0589)  | 0.9234 | 0.9999 |
| MBzP      | myo-Inositol                 | -0.0491 (-0.1039, 0.0057)  | 0.0785 | 0.9330 | -0.0482 (-0.1047, 0.0082)  | 0.0932 | 0.9999 |
| MBzP      | N,N-Dimethylglycine          | -0.0123 (-0.0629, 0.0383)  | 0.6309 | 0.9677 | -0.0219 (-0.0739, 0.0300)  | 0.4040 | 0.9999 |
| MBzP      | O-Acetylcarnitine            | 0.0018 (-0.0534, 0.0570)   | 0.9493 | 0.9901 | -0.0218 (-0.0767, 0.0332)  | 0.4338 | 0.9999 |
| MBzP      | Ornithine                    | -0.0576 (-0.1381, 0.0228)  | 0.1584 | 0.9330 | -0.0509 (-0.1304, 0.0287)  | 0.2072 | 0.9999 |
| MBzP      | Phenylalanine                | -0.0153 (-0.0690, 0.0385)  | 0.5742 | 0.9556 | -0.0186 (-0.0727, 0.0355)  | 0.4956 | 0.9999 |
| MBzP      | Proline                      | 0.0356 (-0.0284, 0.0995)   | 0.2725 | 0.9330 | 0.0339 (-0.0309, 0.0987)   | 0.3017 | 0.9999 |
| MBzP      | Pyruvate                     | 0.0078 (-0.1088, 0.1244)   | 0.8946 | 0.9770 | 0.0522 (-0.0628, 0.1672)   | 0.3696 | 0.9999 |
| MBzP      | Serine                       | -0.0204 (-0.0778, 0.0371)  | 0.4835 | 0.9556 | -0.0209 (-0.0772, 0.0354)  | 0.4623 | 0.9999 |
| MBzP      | Taurine                      | -0.0037 (-0.1073, 0.0998)  | 0.9431 | 0.9901 | -0.0156 (-0.1164, 0.0851)  | 0.7586 | 0.9999 |
| MBzP      | Threonine                    | 0.0025 (-0.0883, 0.0932)   | 0.9572 | 0.9901 | 0.0033 (-0.0893, 0.0959)   | 0.9435 | 0.9999 |
| MBzP      | Tyrosine                     | -0.0101 (-0.0743, 0.0541)  | 0.7553 | 0.9701 | 0.0004 (-0.0634, 0.0641)   | 0.9907 | 0.9999 |
| MBzP      | Urea                         | -0.0048 (-0.0817, 0.0721)  | 0.9016 | 0.9782 | -0.0020 (-0.0770, 0.0730)  | 0.9583 | 0.9999 |
| MBzP      | Valine                       | -0.0031 (-0.0620, 0.0558)  | 0.9175 | 0.9818 | -0.0074 (-0.0663, 0.0516)  | 0.8042 | 0.9999 |
| MCNP      | 2-Hydroxybutyrate            | 0.0880 (-0.0177, 0.1937)   | 0.1019 | 0.9330 | 0.1257 (0.0147, 0.2366)    | 0.0269 | 0.9999 |
| MCNP      | 2-Hydroxyisobutyrate         | -0.0103 (-0.0646, 0.0440)  | 0.7075 | 0.9701 | -0.0026 (-0.0609, 0.0557)  | 0.9292 | 0.9999 |
| MCNP      | 2-Hydroxyisovalerate         | 0.0105 (-0.0507, 0.0716)   | 0.7350 | 0.9701 | 0.0084 (-0.0557, 0.0725)   | 0.7956 | 0.9999 |
| MCNP      | 2-Oxoglutarate               | -0.0358 (-0.1014, 0.0298)  | 0.2815 | 0.9330 | -0.0315 (-0.0996, 0.0366)  | 0.3614 | 0.9999 |
| MCNP      | 2-Oxoisocaproate             | 0.0120 (-0.0580, 0.0821)   | 0.7340 | 0.9701 | 0.0230 (-0.0517, 0.0976)   | 0.5431 | 0.9999 |
| MCNP      | 3-Hydroxybutyrate            | -0.0227 (-0.2071, 0.1616)  | 0.8072 | 0.9701 | 0.0136 (-0.1741, 0.2013)   | 0.8859 | 0.9999 |
| MCNP      | 3-Hydroxyisobutyrate         | 0.0347 (-0.0573, 0.1266)   | 0.4563 | 0.9556 | 0.0726 (-0.0159, 0.1611)   | 0.1069 | 0.9999 |
| MCNP      | 3-Hydroxyisovalerate         | 0.0152 (-0.0391, 0.0696)   | 0.5794 | 0.9556 | 0.0098 (-0.0461, 0.0657)   | 0.7286 | 0.9999 |
| MCNP      | 3-Methyl-2-oxo-butanoic acid | 0.0059 (-0.0479, 0.0597)   | 0.8276 | 0.9701 | 0.0127 (-0.0452, 0.0705)   | 0.6650 | 0.9999 |
| MCNP      | Acetate                      | 0.0017 (-0.0904, 0.0939)   | 0.9701 | 0.9924 | 0.0054 (-0.0907, 0.1015)   | 0.9111 | 0.9999 |
| MCNP      | Acetoacetate                 | -0.0356 (-0.1716, 0.1005)  | 0.6050 | 0.9623 | -0.0132 (-0.1555, 0.1292)  | 0.8545 | 0.9999 |
| MCNP      | Acetone                      | 0.0283 (-0.0719, 0.1284)   | 0.5770 | 0.9556 | 0.0439 (-0.0582, 0.1460)   | 0.3950 | 0.9999 |
| MCNP      | Alanine                      | 0.0260 (-0.0217, 0.0737)   | 0.2820 | 0.9330 | 0.0360 (-0.0135, 0.0856)   | 0.1521 | 0.9999 |
| MCNP      | Arginine                     | 0.0018 (-0.0681, 0.0717)   | 0.9588 | 0.9901 | 0.0292 (-0.0445, 0.1029)   | 0.4333 | 0.9999 |

| Phthalate | Metabolite                   | Total Effect              |        | Direct Effect |                           |        |        |
|-----------|------------------------------|---------------------------|--------|---------------|---------------------------|--------|--------|
|           |                              | Estimate (95% CI)         | p      | FDR p         | Estimate (95% CI)         | p      | FDR p  |
| MCNP      | Asparagine                   | -0.0042 (-0.0711, 0.0626) | 0.8999 | 0.9782        | 0.0065 (-0.0610, 0.0739)  | 0.8496 | 0.9999 |
| MCNP      | Aspartate                    | -0.0894 (-0.1877, 0.0088) | 0.0739 | 0.9330        | -0.0525 (-0.1525, 0.0475) | 0.2998 | 0.9999 |
| MCNP      | Betaine                      | 0.0251 (-0.0292, 0.0793)  | 0.3615 | 0.9330        | 0.0297 (-0.0291, 0.0885)  | 0.3188 | 0.9999 |
| MCNP      | Carnitine                    | 0.0164 (-0.0394, 0.0722)  | 0.5610 | 0.9556        | 0.0288 (-0.0300, 0.0876)  | 0.3340 | 0.9999 |
| MCNP      | Choline                      | 0.0025 (-0.0599, 0.0648)  | 0.9370 | 0.9901        | 0.0189 (-0.0461, 0.0838)  | 0.5657 | 0.9999 |
| MCNP      | Citrate                      | 0.0163 (-0.0443, 0.0768)  | 0.5950 | 0.9588        | 0.0033 (-0.0580, 0.0646)  | 0.9157 | 0.9999 |
| MCNP      | Creatine                     | 0.0439 (-0.0539, 0.1417)  | 0.3750 | 0.9330        | 0.0447 (-0.0568, 0.1462)  | 0.3839 | 0.9999 |
| MCNP      | Creatinine                   | 0.0100 (-0.0372, 0.0571)  | 0.6756 | 0.9701        | 0.0120 (-0.0377, 0.0617)  | 0.6325 | 0.9999 |
| MCNP      | Cystine                      | -0.0574 (-0.1409, 0.0261) | 0.1757 | 0.9330        | -0.0579 (-0.1474, 0.0316) | 0.2019 | 0.9999 |
| MCNP      | Dimethyl sulfone             | 0.0648 (-0.0389, 0.1685)  | 0.2182 | 0.9330        | 0.0619 (-0.0411, 0.1649)  | 0.2360 | 0.9999 |
| MCNP      | Formate                      | -0.0114 (-0.0680, 0.0451) | 0.6890 | 0.9701        | -0.0056 (-0.0645, 0.0532) | 0.8499 | 0.9999 |
| MCNP      | Glucose                      | 0.0003 (-0.0589, 0.0596)  | 0.9908 | 0.9964        | -0.0004 (-0.0624, 0.0616) | 0.9899 | 0.9999 |
| MCNP      | Glutamate                    | -0.0745 (-0.1718, 0.0229) | 0.1321 | 0.9330        | -0.0517 (-0.1534, 0.0500) | 0.3156 | 0.9999 |
| MCNP      | Glutamine                    | 0.0117 (-0.0282, 0.0516)  | 0.5628 | 0.9556        | 0.0054 (-0.0368, 0.0477)  | 0.7988 | 0.9999 |
| MCNP      | Glycine                      | 0.0168 (-0.0437, 0.0773)  | 0.5822 | 0.9556        | 0.0158 (-0.0476, 0.0793)  | 0.6211 | 0.9999 |
| MCNP      | Isoleucine                   | 0.0450 (-0.0321, 0.1222)  | 0.2497 | 0.9330        | 0.0658 (-0.0141, 0.1458)  | 0.1054 | 0.9999 |
| MCNP      | Lactate                      | -0.0244 (-0.0929, 0.0440) | 0.4801 | 0.9556        | -0.0070 (-0.0781, 0.0642) | 0.8462 | 0.9999 |
| MCNP      | Leucine                      | 0.0242 (-0.0422, 0.0905)  | 0.4714 | 0.9556        | 0.0508 (-0.0171, 0.1186)  | 0.1408 | 0.9999 |
| MCNP      | Lysine                       | 0.0417 (-0.0251, 0.1084)  | 0.2183 | 0.9330        | 0.0661 (-0.0025, 0.1347)  | 0.0589 | 0.9999 |
| MCNP      | Methanol                     | 0.0233 (-0.1279, 0.1745)  | 0.7604 | 0.9701        | 0.0185 (-0.1390, 0.1760)  | 0.8161 | 0.9999 |
| MCNP      | Methionine                   | 0.0378 (-0.0264, 0.1020)  | 0.2459 | 0.9330        | 0.0539 (-0.0121, 0.1199)  | 0.1084 | 0.9999 |
| MCNP      | myo-Inositol                 | -0.0210 (-0.0791, 0.0371) | 0.4755 | 0.9556        | -0.0022 (-0.0641, 0.0598) | 0.9448 | 0.9999 |
| MCNP      | N,N-Dimethylglycine          | 0.0116 (-0.0414, 0.0646)  | 0.6659 | 0.9701        | 0.0322 (-0.0237, 0.0882)  | 0.2557 | 0.9999 |
| MCNP      | O-Acetylcarnitine            | 0.0247 (-0.0328, 0.0823)  | 0.3956 | 0.9389        | 0.0512 (-0.0075, 0.1098)  | 0.0865 | 0.9999 |
| MCNP      | Ornithine                    | -0.0215 (-0.1065, 0.0634) | 0.6160 | 0.9626        | -0.0045 (-0.0912, 0.0822) | 0.9180 | 0.9999 |
| MCNP      | Phenylalanine                | 0.0065 (-0.0498, 0.0628)  | 0.8185 | 0.9701        | 0.0166 (-0.0419, 0.0751)  | 0.5748 | 0.9999 |
| MCNP      | Proline                      | 0.0171 (-0.0502, 0.0843)  | 0.6159 | 0.9626        | 0.0356 (-0.0344, 0.1057)  | 0.3155 | 0.9999 |
| MCNP      | Pyruvate                     | -0.0753 (-0.1964, 0.0457) | 0.2199 | 0.9330        | -0.0529 (-0.1772, 0.0715) | 0.4007 | 0.9999 |
| MCNP      | Serine                       | -0.0040 (-0.0643, 0.0563) | 0.8956 | 0.9770        | 0.0106 (-0.0504, 0.0716)  | 0.7308 | 0.9999 |
| MCNP      | Taurine                      | -0.0527 (-0.1606, 0.0552) | 0.3345 | 0.9330        | -0.0131 (-0.1220, 0.0958) | 0.8122 | 0.9999 |
| MCNP      | Threonine                    | -0.0356 (-0.1302, 0.0591) | 0.4579 | 0.9556        | -0.0271 (-0.1270, 0.0728) | 0.5920 | 0.9999 |
| MCNP      | Tyrosine                     | 0.0271 (-0.0400, 0.0941)  | 0.4251 | 0.9462        | 0.0470 (-0.0213, 0.1152)  | 0.1752 | 0.9999 |
| MCNP      | Urea                         | 0.0228 (-0.0576, 0.1031)  | 0.5755 | 0.9556        | 0.0263 (-0.0546, 0.1071)  | 0.5208 | 0.9999 |
| MCNP      | Valine                       | 0.0315 (-0.0299, 0.0928)  | 0.3111 | 0.9330        | 0.0527 (-0.0102, 0.1155)  | 0.0993 | 0.9999 |
| MCOP      | 2-Hydroxybutyrate            | -0.0005 (-0.0862, 0.0852) | 0.9905 | 0.9964        | 0.0480 (-0.0406, 0.1365)  | 0.2850 | 0.9999 |
| MCOP      | 2-Hydroxyisobutyrate         | -0.0237 (-0.0669, 0.0194) | 0.2779 | 0.9330        | -0.0135 (-0.0590, 0.0320) | 0.5580 | 0.9999 |
| MCOP      | 2-Hydroxyisovalerate         | -0.0255 (-0.0741, 0.0231) | 0.3007 | 0.9330        | -0.0221 (-0.0720, 0.0279) | 0.3826 | 0.9999 |
| MCOP      | 2-Oxoglutarate               | -0.0050 (-0.0577, 0.0477) | 0.8515 | 0.9701        | 0.0137 (-0.0397, 0.0671)  | 0.6121 | 0.9999 |
| MCOP      | 2-Oxoisocaproate             | -0.0513 (-0.1064, 0.0038) | 0.0676 | 0.9330        | -0.0347 (-0.0928, 0.0234) | 0.2382 | 0.9999 |
| MCOP      | 3-Hydroxybutyrate            | -0.0611 (-0.2080, 0.0858) | 0.4115 | 0.9462        | -0.0038 (-0.1506, 0.1431) | 0.9596 | 0.9999 |
| MCOP      | 3-Hydroxyisobutyrate         | -0.0100 (-0.0837, 0.0636) | 0.7874 | 0.9701        | 0.0259 (-0.0441, 0.0959)  | 0.4649 | 0.9999 |
| MCOP      | 3-Hydroxyisovalerate         | -0.0058 (-0.0493, 0.0377) | 0.7927 | 0.9701        | 0.0003 (-0.0435, 0.0440)  | 0.9908 | 0.9999 |
| MCOP      | 3-Methyl-2-oxo-butanoic acid | -0.0321 (-0.0746, 0.0104) | 0.1373 | 0.9330        | -0.0216 (-0.0666, 0.0235) | 0.3445 | 0.9999 |
| MCOP      | Acetate                      | 0.0103 (-0.0633, 0.0840)  | 0.7812 | 0.9701        | 0.0050 (-0.0701, 0.0802)  | 0.8946 | 0.9999 |
| MCOP      | Acetoacetate                 | -0.0784 (-0.1862, 0.0293) | 0.1517 | 0.9330        | -0.0540 (-0.1648, 0.0568) | 0.3356 | 0.9999 |
| MCOP      | Acetone                      | 0.0037 (-0.0765, 0.0839)  | 0.9270 | 0.9870        | 0.0191 (-0.0609, 0.0992)  | 0.6365 | 0.9999 |
| MCOP      | Alanine                      | 0.0045 (-0.0338, 0.0428)  | 0.8166 | 0.9701        | 0.0055 (-0.0337, 0.0447)  | 0.7811 | 0.9999 |
| MCOP      | Arginine                     | -0.0163 (-0.0721, 0.0395) | 0.5632 | 0.9556        | -0.0088 (-0.0666, 0.0490) | 0.7633 | 0.9999 |
| MCOP      | Asparagine                   | 0.0121 (-0.0413, 0.0655)  | 0.6544 | 0.9701        | 0.0061 (-0.0467, 0.0588)  | 0.8192 | 0.9999 |
| MCOP      | Aspartate                    | -0.0134 (-0.0932, 0.0664) | 0.7402 | 0.9701        | 0.0094 (-0.0692, 0.0881)  | 0.8123 | 0.9999 |
| MCOP      | Betaine                      | -0.0094 (-0.0529, 0.0341) | 0.6704 | 0.9701        | -0.0060 (-0.0522, 0.0403) | 0.7989 | 0.9999 |
| MCOP      | Carnitine                    | -0.0329 (-0.0772, 0.0113) | 0.1425 | 0.9330        | -0.0171 (-0.0632, 0.0290) | 0.4639 | 0.9999 |
| MCOP      | Choline                      | -0.0137 (-0.0635, 0.0361) | 0.5861 | 0.9556        | 0.0019 (-0.0490, 0.0527)  | 0.9424 | 0.9999 |
| MCOP      | Citrate                      | 0.0259 (-0.0223, 0.0741)  | 0.2891 | 0.9330        | 0.0358 (-0.0116, 0.0832)  | 0.1369 | 0.9999 |
| MCOP      | Creatine                     | 0.0020 (-0.0765, 0.0804)  | 0.9607 | 0.9901        | 0.0015 (-0.0782, 0.0813)  | 0.9697 | 0.9999 |
| MCOP      | Creatinine                   | 0.0358 (-0.0013, 0.0728)  | 0.0582 | 0.9330        | 0.0387 (0.0006, 0.0768)   | 0.0465 | 0.9999 |
| MCOP      | Cystine                      | -0.0445 (-0.1112, 0.0223) | 0.1896 | 0.9330        | -0.0331 (-0.1033, 0.0372) | 0.3527 | 0.9999 |
| MCOP      | Dimethyl sulfone             | 0.0594 (-0.0233, 0.1421)  | 0.1570 | 0.9330        | 0.0311 (-0.0498, 0.1120)  | 0.4474 | 0.9999 |
| MCOP      | Formate                      | -0.0142 (-0.0593, 0.0310) | 0.5343 | 0.9556        | -0.0104 (-0.0564, 0.0356) | 0.6549 | 0.9999 |
| MCOP      | Glucose                      | 0.0092 (-0.0381, 0.0566)  | 0.6998 | 0.9701        | 0.0104 (-0.0380, 0.0589)  | 0.6697 | 0.9999 |

| Phthalate | Metabolite                   | Total Effect               |          |              | Direct Effect             |          |              |
|-----------|------------------------------|----------------------------|----------|--------------|---------------------------|----------|--------------|
|           |                              | Estimate (95% CI)          | <i>p</i> | FDR <i>p</i> | Estimate (95% CI)         | <i>p</i> | FDR <i>p</i> |
| MCOP      | Glutamate                    | -0.0285 (-0.1070, 0.0500)  | 0.4731   | 0.9556       | -0.0091 (-0.0891, 0.0708) | 0.8214   | 0.9999       |
| MCOP      | Glutamine                    | -0.0049 (-0.0369, 0.0270)  | 0.7597   | 0.9701       | -0.0121 (-0.0451, 0.0208) | 0.4663   | 0.9999       |
| MCOP      | Glycine                      | 0.0324 (-0.0156, 0.0804)   | 0.1836   | 0.9330       | 0.0277 (-0.0216, 0.0771)  | 0.2677   | 0.9999       |
| MCOP      | Isoleucine                   | -0.0135 (-0.0755, 0.0486)  | 0.6680   | 0.9701       | -0.0012 (-0.0646, 0.0622) | 0.9692   | 0.9999       |
| MCOP      | Lactate                      | 0.0177 (-0.0370, 0.0725)   | 0.5216   | 0.9556       | 0.0275 (-0.0279, 0.0829)  | 0.3265   | 0.9999       |
| MCOP      | Leucine                      | -0.0176 (-0.0707, 0.0355)  | 0.5124   | 0.9556       | -0.0036 (-0.0573, 0.0501) | 0.8943   | 0.9999       |
| MCOP      | Lysine                       | -0.0044 (-0.0582, 0.0493)  | 0.8707   | 0.9701       | 0.0076 (-0.0470, 0.0623)  | 0.7823   | 0.9999       |
| MCOP      | Methanol                     | -0.0341 (-0.1548, 0.0867)  | 0.5766   | 0.9556       | -0.0174 (-0.1405, 0.1058) | 0.7802   | 0.9999       |
| MCOP      | Methionine                   | 0.0332 (-0.0180, 0.0845)   | 0.2014   | 0.9330       | 0.0339 (-0.0179, 0.0858)  | 0.1973   | 0.9999       |
| MCOP      | myo-Inositol                 | 0.0084 (-0.0381, 0.0550)   | 0.7199   | 0.9701       | 0.0242 (-0.0239, 0.0724)  | 0.3204   | 0.9999       |
| MCOP      | N,N-Dimethylglycine          | -0.0061 (-0.0484, 0.0363)  | 0.7774   | 0.9701       | 0.0064 (-0.0377, 0.0504)  | 0.7751   | 0.9999       |
| MCOP      | O-Acetylcarnitine            | -0.0483 (-0.0934, -0.0032) | 0.0363   | 0.9330       | -0.0214 (-0.0678, 0.0250) | 0.3619   | 0.9999       |
| MCOP      | Ornithine                    | 0.0086 (-0.0594, 0.0766)   | 0.8025   | 0.9701       | 0.0156 (-0.0521, 0.0833)  | 0.6490   | 0.9999       |
| MCOP      | Phenylalanine                | 0.0051 (-0.0399, 0.0501)   | 0.8218   | 0.9701       | 0.0077 (-0.0381, 0.0535)  | 0.7398   | 0.9999       |
| MCOP      | Proline                      | -0.0031 (-0.0569, 0.0507)  | 0.9086   | 0.9785       | 0.0029 (-0.0522, 0.0579)  | 0.9183   | 0.9999       |
| MCOP      | Pyruvate                     | 0.0275 (-0.0698, 0.1249)   | 0.5760   | 0.9556       | 0.0263 (-0.0711, 0.1238)  | 0.5930   | 0.9999       |
| MCOP      | Serine                       | 0.0043 (-0.0439, 0.0524)   | 0.8611   | 0.9701       | 0.0075 (-0.0402, 0.0552)  | 0.7553   | 0.9999       |
| MCOP      | Taurine                      | 0.0443 (-0.0419, 0.1305)   | 0.3098   | 0.9330       | 0.0671 (-0.0170, 0.1512)  | 0.1168   | 0.9999       |
| MCOP      | Threonine                    | -0.0047 (-0.0806, 0.0712)  | 0.9030   | 0.9782       | -0.0156 (-0.0938, 0.0626) | 0.6926   | 0.9999       |
| MCOP      | Tyrosine                     | 0.0334 (-0.0200, 0.0867)   | 0.2173   | 0.9330       | 0.0363 (-0.0171, 0.0897)  | 0.1808   | 0.9999       |
| MCOP      | Urea                         | -0.0155 (-0.0797, 0.0488)  | 0.6341   | 0.9677       | -0.0093 (-0.0727, 0.0541) | 0.7717   | 0.9999       |
| MCOP      | Valine                       | -0.0126 (-0.0618, 0.0366)  | 0.6125   | 0.9626       | 0.0014 (-0.0485, 0.0512)  | 0.9564   | 0.9999       |
| MCPP      | 2-Hydroxybutyrate            | -0.0033 (-0.1271, 0.1206)  | 0.9584   | 0.9901       | 0.0351 (-0.0937, 0.1640)  | 0.5898   | 0.9999       |
| MCPP      | 2-Hydroxyisobutyrate         | -0.0226 (-0.0852, 0.0400)  | 0.4747   | 0.9556       | -0.0205 (-0.0865, 0.0454) | 0.5378   | 0.9999       |
| MCPP      | 2-Hydroxyisovalerate         | -0.0457 (-0.1158, 0.0243)  | 0.1983   | 0.9330       | -0.0484 (-0.1204, 0.0236) | 0.1855   | 0.9999       |
| MCPP      | 2-Oxoglutarate               | -0.0426 (-0.1184, 0.0331)  | 0.2670   | 0.9330       | -0.0264 (-0.1038, 0.0510) | 0.4998   | 0.9999       |
| MCPP      | 2-Oxoisocaproate             | -0.0506 (-0.1310, 0.0297)  | 0.2138   | 0.9330       | -0.0407 (-0.1250, 0.0437) | 0.3412   | 0.9999       |
| MCPP      | 3-Hydroxybutyrate            | -0.1219 (-0.3336, 0.0897)  | 0.2557   | 0.9330       | -0.0598 (-0.2722, 0.1527) | 0.5778   | 0.9999       |
| MCPP      | 3-Hydroxyisobutyrate         | -0.0316 (-0.1379, 0.0748)  | 0.5570   | 0.9556       | 0.0049 (-0.0968, 0.1067)  | 0.9232   | 0.9999       |
| MCPP      | 3-Hydroxyisovalerate         | -0.0103 (-0.0732, 0.0525)  | 0.7447   | 0.9701       | -0.0062 (-0.0696, 0.0572) | 0.8462   | 0.9999       |
| MCPP      | 3-Methyl-2-oxo-butanoic acid | -0.0463 (-0.1078, 0.0151)  | 0.1378   | 0.9330       | -0.0431 (-0.1082, 0.0219) | 0.1911   | 0.9999       |
| MCPP      | Acetate                      | -0.0151 (-0.1216, 0.0914)  | 0.7790   | 0.9701       | -0.0262 (-0.1350, 0.0826) | 0.6336   | 0.9999       |
| MCPP      | Acetoacetate                 | -0.1400 (-0.2948, 0.0148)  | 0.0758   | 0.9330       | -0.1178 (-0.2774, 0.0418) | 0.1461   | 0.9999       |
| MCPP      | Acetone                      | -0.0299 (-0.1456, 0.0859)  | 0.6099   | 0.9626       | -0.0197 (-0.1358, 0.0964) | 0.7369   | 0.9999       |
| MCPP      | Alanine                      | 0.0112 (-0.0441, 0.0666)   | 0.6888   | 0.9701       | 0.0165 (-0.0401, 0.0732)  | 0.5642   | 0.9999       |
| MCPP      | Arginine                     | -0.0230 (-0.1036, 0.0577)  | 0.5734   | 0.9556       | -0.0219 (-0.1055, 0.0618) | 0.6053   | 0.9999       |
| MCPP      | Asparagine                   | -0.0270 (-0.1040, 0.0501)  | 0.4894   | 0.9556       | -0.0446 (-0.1205, 0.0313) | 0.2464   | 0.9999       |
| MCPP      | Aspartate                    | -0.0683 (-0.1828, 0.0463)  | 0.2399   | 0.9330       | -0.0406 (-0.1543, 0.0731) | 0.4801   | 0.9999       |
| MCPP      | Betaine                      | -0.0319 (-0.0944, 0.0307)  | 0.3151   | 0.9330       | -0.0430 (-0.1095, 0.0234) | 0.2018   | 0.9999       |
| MCPP      | Carnitine                    | -0.0268 (-0.0912, 0.0376)  | 0.4102   | 0.9462       | -0.0090 (-0.0760, 0.0579) | 0.7897   | 0.9999       |
| MCPP      | Choline                      | -0.0504 (-0.1217, 0.0209)  | 0.1639   | 0.9330       | -0.0459 (-0.1191, 0.0272) | 0.2155   | 0.9999       |
| MCPP      | Citrate                      | -0.0013 (-0.0713, 0.0688)  | 0.9717   | 0.9924       | 0.0011 (-0.0684, 0.0705)  | 0.9761   | 0.9999       |
| MCPP      | Creatine                     | 0.0295 (-0.0837, 0.1428)   | 0.6059   | 0.9623       | 0.0229 (-0.0926, 0.1383)  | 0.6951   | 0.9999       |
| MCPP      | Creatinine                   | 0.0139 (-0.0406, 0.0683)   | 0.6146   | 0.9626       | 0.0111 (-0.0453, 0.0674)  | 0.6970   | 0.9999       |
| MCPP      | Cystine                      | -0.0942 (-0.1897, 0.0013)  | 0.0532   | 0.9330       | -0.0922 (-0.1927, 0.0084) | 0.0721   | 0.9999       |
| MCPP      | Dimethyl sulfone             | 0.0965 (-0.0227, 0.2157)   | 0.1115   | 0.9330       | 0.0592 (-0.0578, 0.1762)  | 0.3179   | 0.9999       |
| MCPP      | Formate                      | -0.0343 (-0.0993, 0.0307)  | 0.2973   | 0.9330       | -0.0318 (-0.0982, 0.0347) | 0.3449   | 0.9999       |
| MCPP      | Glucose                      | 0.0214 (-0.0469, 0.0897)   | 0.5356   | 0.9556       | 0.0277 (-0.0423, 0.0978)  | 0.4335   | 0.9999       |
| MCPP      | Glutamate                    | -0.0654 (-0.1784, 0.0476)  | 0.2535   | 0.9330       | -0.0425 (-0.1580, 0.0731) | 0.4674   | 0.9999       |
| MCPP      | Glutamine                    | -0.0184 (-0.0644, 0.0277)  | 0.4302   | 0.9473       | -0.0298 (-0.0773, 0.0177) | 0.2157   | 0.9999       |
| MCPP      | Glycine                      | 0.0253 (-0.0445, 0.0952)   | 0.4736   | 0.9556       | 0.0164 (-0.0555, 0.0883)  | 0.6519   | 0.9999       |
| MCPP      | Isoleucine                   | -0.0221 (-0.1118, 0.0676)  | 0.6255   | 0.9677       | -0.0077 (-0.0996, 0.0842) | 0.8685   | 0.9999       |
| MCPP      | Lactate                      | 0.0272 (-0.0519, 0.1063)   | 0.4962   | 0.9556       | 0.0403 (-0.0399, 0.1206)  | 0.3209   | 0.9999       |
| MCPP      | Leucine                      | -0.0392 (-0.1156, 0.0373)  | 0.3120   | 0.9330       | -0.0255 (-0.1032, 0.0521) | 0.5151   | 0.9999       |
| MCPP      | Lysine                       | -0.0116 (-0.0893, 0.0660)  | 0.7673   | 0.9701       | 0.0006 (-0.0786, 0.0799)  | 0.9874   | 0.9999       |
| MCPP      | Methanol                     | -0.0305 (-0.2052, 0.1442)  | 0.7297   | 0.9701       | -0.0137 (-0.1923, 0.1648) | 0.8790   | 0.9999       |
| MCPP      | Methionine                   | 0.0300 (-0.0445, 0.1045)   | 0.4256   | 0.9462       | 0.0282 (-0.0474, 0.1039)  | 0.4606   | 0.9999       |
| MCPP      | myo-Inositol                 | -0.0104 (-0.0776, 0.0569)  | 0.7606   | 0.9701       | 0.0008 (-0.0694, 0.0709)  | 0.9827   | 0.9999       |
| MCPP      | N,N-Dimethylglycine          | -0.0142 (-0.0754, 0.0470)  | 0.6457   | 0.9690       | -0.0114 (-0.0752, 0.0525) | 0.7247   | 0.9999       |
| MCPP      | O-Acetylcarnitine            | -0.0433 (-0.1094, 0.0229)  | 0.1974   | 0.9330       | -0.0204 (-0.0878, 0.0470) | 0.5489   | 0.9999       |

| Phthalate | Metabolite                   | Total Effect              |          |              | Direct Effect             |          |              |
|-----------|------------------------------|---------------------------|----------|--------------|---------------------------|----------|--------------|
|           |                              | Estimate (95% CI)         | <i>p</i> | FDR <i>p</i> | Estimate (95% CI)         | <i>p</i> | FDR <i>p</i> |
| MCPP      | Ornithine                    | -0.0025 (-0.1008, 0.0957) | 0.9595   | 0.9901       | 0.0092 (-0.0890, 0.1074)  | 0.8529   | 0.9999       |
| MCPP      | Phenylalanine                | -0.0206 (-0.0855, 0.0443) | 0.5302   | 0.9556       | -0.0216 (-0.0879, 0.0446) | 0.5185   | 0.9999       |
| MCPP      | Proline                      | -0.0055 (-0.0832, 0.0723) | 0.8894   | 0.9756       | 0.0018 (-0.0781, 0.0816)  | 0.9648   | 0.9999       |
| MCPP      | Pyruvate                     | 0.0443 (-0.0964, 0.1849)  | 0.5337   | 0.9556       | 0.0578 (-0.0832, 0.1987)  | 0.4181   | 0.9999       |
| MCPP      | Serine                       | -0.0216 (-0.0911, 0.0480) | 0.5398   | 0.9556       | -0.0200 (-0.0891, 0.0491) | 0.5666   | 0.9999       |
| MCPP      | Taurine                      | -0.0278 (-0.1529, 0.0973) | 0.6607   | 0.9701       | -0.0065 (-0.1299, 0.1170) | 0.9174   | 0.9999       |
| MCPP      | Threonine                    | -0.0547 (-0.1639, 0.0544) | 0.3222   | 0.9330       | -0.0812 (-0.1934, 0.0310) | 0.1543   | 0.9999       |
| MCPP      | Tyrosine                     | 0.0062 (-0.0715, 0.0839)  | 0.8744   | 0.9701       | 0.0070 (-0.0711, 0.0851)  | 0.8598   | 0.9999       |
| MCPP      | Urea                         | -0.0416 (-0.1342, 0.0511) | 0.3755   | 0.9330       | -0.0480 (-0.1393, 0.0433) | 0.2996   | 0.9999       |
| MCPP      | Valine                       | -0.0325 (-0.1034, 0.0384) | 0.3647   | 0.9330       | -0.0174 (-0.0896, 0.0547) | 0.6326   | 0.9999       |
| MECPP     | 2-Hydroxybutyrate            | 0.0425 (-0.0785, 0.1635)  | 0.4872   | 0.9556       | 0.0518 (-0.0733, 0.1770)  | 0.4131   | 0.9999       |
| MECPP     | 2-Hydroxyisobutyrate         | 0.0131 (-0.0483, 0.0746)  | 0.6719   | 0.9701       | 0.0124 (-0.0519, 0.0767)  | 0.7030   | 0.9999       |
| MECPP     | 2-Hydroxyisovalerate         | 0.0245 (-0.0445, 0.0936)  | 0.4824   | 0.9556       | 0.0201 (-0.0505, 0.0908)  | 0.5732   | 0.9999       |
| MECPP     | 2-Oxoglutarate               | 0.0052 (-0.0694, 0.0799)  | 0.8896   | 0.9756       | 0.0181 (-0.0573, 0.0935)  | 0.6344   | 0.9999       |
| MECPP     | 2-Oxoisocaproate             | -0.0427 (-0.1215, 0.0362) | 0.2856   | 0.9330       | -0.0411 (-0.1232, 0.0410) | 0.3227   | 0.9999       |
| MECPP     | 3-Hydroxybutyrate            | -0.0201 (-0.2288, 0.1885) | 0.8485   | 0.9701       | -0.0286 (-0.2356, 0.1785) | 0.7847   | 0.9999       |
| MECPP     | 3-Hydroxyisobutyrate         | 0.0494 (-0.0545, 0.1533)  | 0.3475   | 0.9330       | 0.0363 (-0.0624, 0.1350)  | 0.4674   | 0.9999       |
| MECPP     | 3-Hydroxyisovalerate         | -0.0167 (-0.0782, 0.0448) | 0.5916   | 0.9556       | -0.0145 (-0.0761, 0.0471) | 0.6420   | 0.9999       |
| MECPP     | 3-Methyl-2-oxo-butanoic acid | -0.0153 (-0.0761, 0.0455) | 0.6184   | 0.9642       | -0.0137 (-0.0775, 0.0501) | 0.6717   | 0.9999       |
| MECPP     | Acetate                      | -0.0011 (-0.1054, 0.1032) | 0.9830   | 0.9964       | 0.0028 (-0.1033, 0.1088)  | 0.9588   | 0.9999       |
| MECPP     | Acetoacetate                 | -0.0686 (-0.2221, 0.0850) | 0.3777   | 0.9330       | -0.0688 (-0.2253, 0.0876) | 0.3846   | 0.9999       |
| MECPP     | Acetone                      | 0.0853 (-0.0269, 0.1975)  | 0.1347   | 0.9330       | 0.0728 (-0.0393, 0.1849)  | 0.2002   | 0.9999       |
| MECPP     | Alanine                      | 0.0455 (-0.0080, 0.0989)  | 0.0949   | 0.9330       | 0.0484 (-0.0059, 0.1028)  | 0.0801   | 0.9999       |
| MECPP     | Arginine                     | 0.0003 (-0.0788, 0.0794)  | 0.9940   | 0.9964       | 0.0069 (-0.0747, 0.0884)  | 0.8677   | 0.9999       |
| MECPP     | Asparagine                   | 0.0255 (-0.0500, 0.1011)  | 0.5037   | 0.9556       | 0.0183 (-0.0560, 0.0926)  | 0.6258   | 0.9999       |
| MECPP     | Aspartate                    | 0.0043 (-0.1087, 0.1173)  | 0.9400   | 0.9901       | -0.0043 (-0.1152, 0.1066) | 0.9390   | 0.9999       |
| MECPP     | Betaine                      | 0.0193 (-0.0422, 0.0808)  | 0.5343   | 0.9556       | 0.0193 (-0.0458, 0.0845)  | 0.5569   | 0.9999       |
| MECPP     | Carnitine                    | 0.0047 (-0.0586, 0.0679)  | 0.8839   | 0.9738       | 0.0087 (-0.0565, 0.0739)  | 0.7915   | 0.9999       |
| MECPP     | Choline                      | 0.0637 (-0.0057, 0.1331)  | 0.0714   | 0.9330       | 0.0606 (-0.0101, 0.1313)  | 0.0922   | 0.9999       |
| MECPP     | Citrate                      | 0.0369 (-0.0313, 0.1052)  | 0.2853   | 0.9330       | 0.0375 (-0.0297, 0.1047)  | 0.2705   | 0.9999       |
| MECPP     | Creatine                     | -0.0004 (-0.1114, 0.1107) | 0.9949   | 0.9964       | -0.0216 (-0.1339, 0.0908) | 0.7041   | 0.9999       |
| MECPP     | Creatinine                   | 0.0234 (-0.0298, 0.0766)  | 0.3844   | 0.9360       | 0.0223 (-0.0324, 0.0770)  | 0.4194   | 0.9999       |
| MECPP     | Cystine                      | -0.0232 (-0.1185, 0.0720) | 0.6294   | 0.9677       | -0.0103 (-0.1098, 0.0893) | 0.8384   | 0.9999       |
| MECPP     | Dimethyl sulfone             | 0.0365 (-0.0816, 0.1545)  | 0.5410   | 0.9556       | 0.0133 (-0.1012, 0.1278)  | 0.8183   | 0.9999       |
| MECPP     | Formate                      | 0.0180 (-0.0460, 0.0819)  | 0.5781   | 0.9556       | 0.0131 (-0.0518, 0.0780)  | 0.6905   | 0.9999       |
| MECPP     | Glucose                      | -0.0467 (-0.1131, 0.0197) | 0.1660   | 0.9330       | -0.0332 (-0.1013, 0.0348) | 0.3344   | 0.9999       |
| MECPP     | Glutamate                    | 0.0533 (-0.0576, 0.1643)  | 0.3422   | 0.9330       | 0.0598 (-0.0524, 0.1719)  | 0.2928   | 0.9999       |
| MECPP     | Glutamine                    | -0.0239 (-0.0688, 0.0211) | 0.2949   | 0.9330       | -0.0323 (-0.0784, 0.0139) | 0.1685   | 0.9999       |
| MECPP     | Glycine                      | 0.0499 (-0.0180, 0.1177)  | 0.1477   | 0.9330       | 0.0419 (-0.0277, 0.1114)  | 0.2349   | 0.9999       |
| MECPP     | Isoleucine                   | 0.0107 (-0.0773, 0.0986)  | 0.8104   | 0.9701       | 0.0081 (-0.0813, 0.0975)  | 0.8575   | 0.9999       |
| MECPP     | Lactate                      | 0.0533 (-0.0237, 0.1302)  | 0.1726   | 0.9330       | 0.0580 (-0.0196, 0.1356)  | 0.1414   | 0.9999       |
| MECPP     | Leucine                      | 0.0082 (-0.0671, 0.0835)  | 0.8292   | 0.9701       | 0.0050 (-0.0707, 0.0807)  | 0.8963   | 0.9999       |
| MECPP     | Lysine                       | 0.0092 (-0.0668, 0.0853)  | 0.8106   | 0.9701       | 0.0035 (-0.0736, 0.0806)  | 0.9285   | 0.9999       |
| MECPP     | Methanol                     | -0.0784 (-0.2488, 0.0921) | 0.3638   | 0.9330       | -0.1114 (-0.2837, 0.0609) | 0.2026   | 0.9999       |
| MECPP     | Methionine                   | 0.0202 (-0.0529, 0.0932)  | 0.5853   | 0.9556       | 0.0111 (-0.0627, 0.0849)  | 0.7667   | 0.9999       |
| MECPP     | myo-Inositol                 | 0.0014 (-0.0645, 0.0673)  | 0.9663   | 0.9924       | -0.0004 (-0.0687, 0.0679) | 0.9911   | 0.9999       |
| MECPP     | N,N-Dimethylglycine          | 0.0123 (-0.0476, 0.0723)  | 0.6844   | 0.9701       | 0.0142 (-0.0479, 0.0763)  | 0.6505   | 0.9999       |
| MECPP     | O-Acetylcarnitine            | 0.0062 (-0.0591, 0.0715)  | 0.8508   | 0.9701       | 0.0005 (-0.0652, 0.0663)  | 0.9870   | 0.9999       |
| MECPP     | Ornithine                    | 0.0180 (-0.0782, 0.1141)  | 0.7118   | 0.9701       | 0.0012 (-0.0944, 0.0968)  | 0.9806   | 0.9999       |
| MECPP     | Phenylalanine                | 0.0238 (-0.0398, 0.0873)  | 0.4593   | 0.9556       | 0.0145 (-0.0501, 0.0791)  | 0.6570   | 0.9999       |
| MECPP     | Proline                      | 0.0011 (-0.0751, 0.0773)  | 0.9766   | 0.9958       | 0.0059 (-0.0718, 0.0836)  | 0.8808   | 0.9999       |
| MECPP     | Pyruvate                     | 0.0732 (-0.0641, 0.2104)  | 0.2927   | 0.9330       | 0.0954 (-0.0410, 0.2317)  | 0.1682   | 0.9999       |
| MECPP     | Serine                       | 0.0545 (-0.0128, 0.1219)  | 0.1112   | 0.9330       | 0.0455 (-0.0212, 0.1122)  | 0.1786   | 0.9999       |
| MECPP     | Taurine                      | 0.0689 (-0.0530, 0.1908)  | 0.2647   | 0.9330       | 0.0521 (-0.0676, 0.1718)  | 0.3895   | 0.9999       |
| MECPP     | Threonine                    | 0.0142 (-0.0932, 0.1216)  | 0.7942   | 0.9701       | 0.0059 (-0.1044, 0.1163)  | 0.9151   | 0.9999       |
| MECPP     | Tyrosine                     | 0.0062 (-0.0698, 0.0823)  | 0.8711   | 0.9701       | 0.0048 (-0.0712, 0.0808)  | 0.9001   | 0.9999       |
| MECPP     | Urea                         | 0.0300 (-0.0609, 0.1209)  | 0.5140   | 0.9556       | 0.0104 (-0.0789, 0.0998)  | 0.8172   | 0.9999       |
| MECPP     | Valine                       | 0.0300 (-0.0395, 0.0995)  | 0.3936   | 0.9389       | 0.0294 (-0.0407, 0.0994)  | 0.4075   | 0.9999       |
| MEHHP     | 2-Hydroxybutyrate            | 0.0104 (-0.1033, 0.1242)  | 0.8561   | 0.9701       | 0.0225 (-0.0959, 0.1409)  | 0.7074   | 0.9999       |
| MEHHP     | 2-Hydroxyisobutyrate         | 0.0062 (-0.0514, 0.0639)  | 0.8304   | 0.9701       | 0.0040 (-0.0566, 0.0647)  | 0.8952   | 0.9999       |

| Phthalate | Metabolite                   | Total Effect               |          |              | Direct Effect              |          |              |
|-----------|------------------------------|----------------------------|----------|--------------|----------------------------|----------|--------------|
|           |                              | Estimate (95% CI)          | <i>p</i> | FDR <i>p</i> | Estimate (95% CI)          | <i>p</i> | FDR <i>p</i> |
| MEHHP     | 2-Hydroxyisovalerate         | 0.0258 (-0.0389, 0.0905)   | 0.4314   | 0.9473       | 0.0253 (-0.0412, 0.0918)   | 0.4524   | 0.9999       |
| MEHHP     | 2-Oxoglutarate               | 0.0031 (-0.0669, 0.0731)   | 0.9297   | 0.9870       | 0.0207 (-0.0503, 0.0918)   | 0.5636   | 0.9999       |
| MEHHP     | 2-Oxoisocaproate             | -0.0363 (-0.1103, 0.0377)  | 0.3327   | 0.9330       | -0.0340 (-0.1115, 0.0435)  | 0.3864   | 0.9999       |
| MEHHP     | 3-Hydroxybutyrate            | -0.0252 (-0.2209, 0.1704)  | 0.7985   | 0.9701       | -0.0309 (-0.2262, 0.1643)  | 0.7539   | 0.9999       |
| MEHHP     | 3-Hydroxyisobutyrate         | 0.0431 (-0.0543, 0.1406)   | 0.3818   | 0.9350       | 0.0290 (-0.0642, 0.1222)   | 0.5381   | 0.9999       |
| MEHHP     | 3-Hydroxyisovalerate         | -0.0290 (-0.0865, 0.0285)  | 0.3193   | 0.9330       | -0.0204 (-0.0785, 0.0376)  | 0.4868   | 0.9999       |
| MEHHP     | 3-Methyl-2-oxo-butanoic acid | -0.0131 (-0.0701, 0.0439)  | 0.6494   | 0.9690       | -0.0112 (-0.0714, 0.0490)  | 0.7125   | 0.9999       |
| MEHHP     | Acetate                      | 0.0089 (-0.0889, 0.1067)   | 0.8568   | 0.9701       | 0.0073 (-0.0927, 0.1073)   | 0.8856   | 0.9999       |
| MEHHP     | Acetoacetate                 | -0.0315 (-0.1759, 0.1129)  | 0.6657   | 0.9701       | -0.0336 (-0.1816, 0.1144)  | 0.6534   | 0.9999       |
| MEHHP     | Acetone                      | 0.0799 (-0.0253, 0.1852)   | 0.1351   | 0.9330       | 0.0710 (-0.0347, 0.1767)   | 0.1856   | 0.9999       |
| MEHHP     | Alanine                      | 0.0536 ( 0.0039, 0.1033)   | 0.0350   | 0.9330       | 0.0542 ( 0.0033, 0.1052)   | 0.0372   | 0.9999       |
| MEHHP     | Arginine                     | -0.0083 (-0.0825, 0.0658)  | 0.8237   | 0.9701       | -0.0133 (-0.0902, 0.0636)  | 0.7320   | 0.9999       |
| MEHHP     | Asparagine                   | 0.0445 (-0.0259, 0.1149)   | 0.2130   | 0.9330       | 0.0281 (-0.0419, 0.0980)   | 0.4275   | 0.9999       |
| MEHHP     | Aspartate                    | 0.0048 (-0.1012, 0.1108)   | 0.9288   | 0.9870       | -0.0161 (-0.1206, 0.0885)  | 0.7611   | 0.9999       |
| MEHHP     | Betaine                      | 0.0216 (-0.0361, 0.0792)   | 0.4594   | 0.9556       | 0.0217 (-0.0396, 0.0831)   | 0.4839   | 0.9999       |
| MEHHP     | Carnitine                    | 0.0032 (-0.0562, 0.0625)   | 0.9156   | 0.9818       | 0.0088 (-0.0527, 0.0702)   | 0.7775   | 0.9999       |
| MEHHP     | Choline                      | 0.0628 (-0.0021, 0.1278)   | 0.0578   | 0.9330       | 0.0589 (-0.0078, 0.1255)   | 0.0827   | 0.9999       |
| MEHHP     | Citrate                      | 0.0273 (-0.0369, 0.0914)   | 0.4010   | 0.9389       | 0.0407 (-0.0226, 0.1039)   | 0.2049   | 0.9999       |
| MEHHP     | Creatine                     | -0.0143 (-0.1184, 0.0898)  | 0.7862   | 0.9701       | -0.0335 (-0.1393, 0.0724)  | 0.5317   | 0.9999       |
| MEHHP     | Creatinine                   | 0.0206 (-0.0293, 0.0705)   | 0.4143   | 0.9462       | 0.0195 (-0.0321, 0.0712)   | 0.4545   | 0.9999       |
| MEHHP     | Cystine                      | -0.0179 (-0.1073, 0.0715)  | 0.6921   | 0.9701       | -0.0025 (-0.0965, 0.0914)  | 0.9571   | 0.9999       |
| MEHHP     | Dimethyl sulfone             | 0.0393 (-0.0714, 0.1499)   | 0.4827   | 0.9556       | 0.0029 (-0.1051, 0.1109)   | 0.9570   | 0.9999       |
| MEHHP     | Formate                      | 0.0255 (-0.0343, 0.0854)   | 0.3993   | 0.9389       | 0.0191 (-0.0421, 0.0803)   | 0.5367   | 0.9999       |
| MEHHP     | Glucose                      | -0.0439 (-0.1061, 0.0184)  | 0.1654   | 0.9330       | -0.0298 (-0.0940, 0.0344)  | 0.3592   | 0.9999       |
| MEHHP     | Glutamate                    | 0.0614 (-0.0424, 0.1652)   | 0.2432   | 0.9330       | 0.0623 (-0.0433, 0.1679)   | 0.2447   | 0.9999       |
| MEHHP     | Glutamine                    | -0.0192 (-0.0615, 0.0230)  | 0.3684   | 0.9330       | -0.0257 (-0.0694, 0.0179)  | 0.2448   | 0.9999       |
| MEHHP     | Glycine                      | 0.0321 (-0.0319, 0.0961)   | 0.3217   | 0.9330       | 0.0231 (-0.0428, 0.0890)   | 0.4877   | 0.9999       |
| MEHHP     | Isoleucine                   | 0.0087 (-0.0738, 0.0911)   | 0.8351   | 0.9701       | 0.0029 (-0.0815, 0.0873)   | 0.9456   | 0.9999       |
| MEHHP     | Lactate                      | 0.0610 (-0.0108, 0.1328)   | 0.0948   | 0.9330       | 0.0604 (-0.0127, 0.1334)   | 0.1041   | 0.9999       |
| MEHHP     | Leucine                      | 0.0135 (-0.0571, 0.0841)   | 0.7048   | 0.9701       | 0.0040 (-0.0674, 0.0754)   | 0.9121   | 0.9999       |
| MEHHP     | Lysine                       | 0.0086 (-0.0627, 0.0800)   | 0.8108   | 0.9701       | -0.0027 (-0.0755, 0.0701)  | 0.9412   | 0.9999       |
| MEHHP     | Methanol                     | -0.0977 (-0.2570, 0.0617)  | 0.2267   | 0.9330       | -0.1225 (-0.2846, 0.0395)  | 0.1366   | 0.9999       |
| MEHHP     | Methionine                   | 0.0292 (-0.0392, 0.0976)   | 0.3993   | 0.9389       | 0.0130 (-0.0566, 0.0826)   | 0.7120   | 0.9999       |
| MEHHP     | myo-Inositol                 | 0.0018 (-0.0600, 0.0636)   | 0.9543   | 0.9901       | -0.0074 (-0.0718, 0.0570)  | 0.8196   | 0.9999       |
| MEHHP     | N,N-Dimethylglycine          | 0.0154 (-0.0408, 0.0716)   | 0.5886   | 0.9556       | 0.0119 (-0.0467, 0.0705)   | 0.6881   | 0.9999       |
| MEHHP     | O-Acetylcarnitine            | -0.0024 (-0.0637, 0.0589)  | 0.9383   | 0.9901       | -0.0120 (-0.0740, 0.0499)  | 0.7006   | 0.9999       |
| MEHHP     | Ornithine                    | 0.0441 (-0.0458, 0.1339)   | 0.3327   | 0.9330       | 0.0192 (-0.0709, 0.1093)   | 0.6735   | 0.9999       |
| MEHHP     | Phenylalanine                | 0.0301 (-0.0293, 0.0896)   | 0.3173   | 0.9330       | 0.0176 (-0.0432, 0.0785)   | 0.5666   | 0.9999       |
| MEHHP     | Proline                      | 0.0333 (-0.0379, 0.1044)   | 0.3555   | 0.9330       | 0.0318 (-0.0412, 0.1048)   | 0.3892   | 0.9999       |
| MEHHP     | Pyruvate                     | 0.1197 (-0.0075, 0.2469)   | 0.0649   | 0.9330       | 0.1292 ( 0.0019, 0.2564)   | 0.0467   | 0.9999       |
| MEHHP     | Serine                       | 0.0436 (-0.0197, 0.1070)   | 0.1750   | 0.9330       | 0.0303 (-0.0329, 0.0935)   | 0.3438   | 0.9999       |
| MEHHP     | Taurine                      | 0.0679 (-0.0463, 0.1822)   | 0.2408   | 0.9330       | 0.0383 (-0.0748, 0.1514)   | 0.5026   | 0.9999       |
| MEHHP     | Threonine                    | 0.0381 (-0.0624, 0.1386)   | 0.4535   | 0.9556       | 0.0210 (-0.0830, 0.1250)   | 0.6895   | 0.9999       |
| MEHHP     | Tyrosine                     | 0.0194 (-0.0519, 0.0906)   | 0.5903   | 0.9556       | 0.0098 (-0.0619, 0.0815)   | 0.7874   | 0.9999       |
| MEHHP     | Urea                         | 0.0328 (-0.0524, 0.1180)   | 0.4462   | 0.9556       | 0.0153 (-0.0690, 0.0996)   | 0.7191   | 0.9999       |
| MEHHP     | Valine                       | 0.0319 (-0.0332, 0.0970)   | 0.3326   | 0.9330       | 0.0284 (-0.0376, 0.0945)   | 0.3948   | 0.9999       |
| MEHP      | 2-Hydroxybutyrate            | -0.0581 (-0.1839, 0.0677)  | 0.3619   | 0.9330       | -0.0505 (-0.1826, 0.0817)  | 0.4502   | 0.9999       |
| MEHP      | 2-Hydroxyisobutyrate         | -0.0357 (-0.0994, 0.0279)  | 0.2675   | 0.9330       | -0.0381 (-0.1055, 0.0294)  | 0.2653   | 0.9999       |
| MEHP      | 2-Hydroxyisovalerate         | 0.0087 (-0.0633, 0.0808)   | 0.8104   | 0.9701       | 0.0132 (-0.0614, 0.0878)   | 0.7269   | 0.9999       |
| MEHP      | 2-Oxoglutarate               | -0.0200 (-0.0976, 0.0577)  | 0.6112   | 0.9626       | -0.0018 (-0.0814, 0.0778)  | 0.9639   | 0.9999       |
| MEHP      | 2-Oxoisocaproate             | -0.0943 (-0.1746, -0.0139) | 0.0221   | 0.9330       | -0.0969 (-0.1817, -0.0121) | 0.0256   | 0.9999       |
| MEHP      | 3-Hydroxybutyrate            | -0.1803 (-0.3946, 0.0340)  | 0.0981   | 0.9330       | -0.1766 (-0.3922, 0.0390)  | 0.1072   | 0.9999       |
| MEHP      | 3-Hydroxyisobutyrate         | 0.0366 (-0.0718, 0.1450)   | 0.5042   | 0.9556       | 0.0336 (-0.0706, 0.1379)   | 0.5232   | 0.9999       |
| MEHP      | 3-Hydroxyisovalerate         | -0.0576 (-0.1207, 0.0055)  | 0.0732   | 0.9330       | -0.0456 (-0.1100, 0.0188)  | 0.1633   | 0.9999       |
| MEHP      | 3-Methyl-2-oxo-butanoic acid | -0.0490 (-0.1116, 0.0136)  | 0.1238   | 0.9330       | -0.0520 (-0.1185, 0.0146)  | 0.1243   | 0.9999       |
| MEHP      | Acetate                      | 0.0317 (-0.0768, 0.1401)   | 0.5633   | 0.9556       | 0.0129 (-0.0990, 0.1247)   | 0.8197   | 0.9999       |
| MEHP      | Acetoacetate                 | -0.0731 (-0.2329, 0.0867)  | 0.3664   | 0.9330       | -0.0679 (-0.2330, 0.0973)  | 0.4166   | 0.9999       |
| MEHP      | Acetone                      | 0.0799 (-0.0372, 0.1971)   | 0.1787   | 0.9330       | 0.0943 (-0.0234, 0.2121)   | 0.1151   | 0.9999       |
| MEHP      | Alanine                      | 0.0716 ( 0.0169, 0.1262)   | 0.0108   | 0.9330       | 0.0693 ( 0.0128, 0.1259)   | 0.0168   | 0.9999       |



| Phthalate | Metabolite                   | Total Effect              |        |        | Direct Effect             |        |        |
|-----------|------------------------------|---------------------------|--------|--------|---------------------------|--------|--------|
|           |                              | Estimate (95% CI)         | p      | FDR p  | Estimate (95% CI)         | p      | FDR p  |
| MEHP      | Arginine                     | -0.0374 (-0.1195, 0.0446) | 0.3673 | 0.9330 | -0.0343 (-0.1201, 0.0514) | 0.4288 | 0.9999 |
| MEHP      | Asparagine                   | 0.0834 ( 0.0063, 0.1604)  | 0.0342 | 0.9330 | 0.0652 (-0.0122, 0.1426)  | 0.0976 | 0.9999 |
| MEHP      | Aspartate                    | -0.0104 (-0.1281, 0.1072) | 0.8606 | 0.9701 | -0.0125 (-0.1295, 0.1045) | 0.8324 | 0.9999 |
| MEHP      | Betaine                      | 0.0361 (-0.0277, 0.0998)  | 0.2645 | 0.9330 | 0.0452 (-0.0230, 0.1134)  | 0.1919 | 0.9999 |
| MEHP      | Carnitine                    | 0.0107 (-0.0552, 0.0766)  | 0.7480 | 0.9701 | 0.0139 (-0.0548, 0.0826)  | 0.6892 | 0.9999 |
| MEHP      | Choline                      | 0.0451 (-0.0278, 0.1180)  | 0.2228 | 0.9330 | 0.0518 (-0.0232, 0.1268)  | 0.1733 | 0.9999 |
| MEHP      | Citrate                      | -0.0112 (-0.0826, 0.0602) | 0.7566 | 0.9701 | 0.0044 (-0.0670, 0.0757)  | 0.9037 | 0.9999 |
| MEHP      | Creatine                     | -0.0111 (-0.1267, 0.1046) | 0.8497 | 0.9701 | -0.0165 (-0.1351, 0.1021) | 0.7827 | 0.9999 |
| MEHP      | Creatinine                   | 0.0237 (-0.0317, 0.0792)  | 0.3973 | 0.9389 | 0.0239 (-0.0338, 0.0816)  | 0.4129 | 0.9999 |
| MEHP      | Cystine                      | -0.0277 (-0.1269, 0.0714) | 0.5800 | 0.9556 | -0.0224 (-0.1274, 0.0826) | 0.6727 | 0.9999 |
| MEHP      | Dimethyl sulfone             | 0.0630 (-0.0595, 0.1856)  | 0.3098 | 0.9330 | 0.0170 (-0.1037, 0.1378)  | 0.7803 | 0.9999 |
| MEHP      | Formate                      | 0.0300 (-0.0364, 0.0964)  | 0.3722 | 0.9330 | 0.0189 (-0.0496, 0.0873)  | 0.5854 | 0.9999 |
| MEHP      | Glucose                      | -0.0493 (-0.1184, 0.0198) | 0.1601 | 0.9330 | -0.0456 (-0.1172, 0.0259) | 0.2086 | 0.9999 |
| MEHP      | Glutamate                    | 0.0388 (-0.0770, 0.1546)  | 0.5078 | 0.9556 | 0.0456 (-0.0730, 0.1642)  | 0.4472 | 0.9999 |
| MEHP      | Glutamine                    | -0.0178 (-0.0648, 0.0292) | 0.4535 | 0.9556 | -0.0172 (-0.0663, 0.0319) | 0.4883 | 0.9999 |
| MEHP      | Glycine                      | 0.0301 (-0.0411, 0.1013)  | 0.4035 | 0.9416 | 0.0269 (-0.0468, 0.1006)  | 0.4707 | 0.9999 |
| MEHP      | Isoleucine                   | -0.0122 (-0.1038, 0.0793) | 0.7916 | 0.9701 | -0.0131 (-0.1075, 0.0812) | 0.7829 | 0.9999 |
| MEHP      | Lactate                      | 0.0827 ( 0.0035, 0.1618)  | 0.0408 | 0.9330 | 0.0817 ( 0.0006, 0.1629)  | 0.0484 | 0.9999 |
| MEHP      | Leucine                      | 0.0068 (-0.0716, 0.0852)  | 0.8633 | 0.9701 | 0.0063 (-0.0736, 0.0861)  | 0.8769 | 0.9999 |
| MEHP      | Lysine                       | 0.0244 (-0.0546, 0.1035)  | 0.5410 | 0.9556 | 0.0274 (-0.0538, 0.1086)  | 0.5043 | 0.9999 |
| MEHP      | Methanol                     | -0.0373 (-0.2155, 0.1408) | 0.6783 | 0.9701 | -0.0737 (-0.2564, 0.1091) | 0.4254 | 0.9999 |
| MEHP      | Methionine                   | 0.0604 (-0.0148, 0.1357)  | 0.1142 | 0.9330 | 0.0499 (-0.0273, 0.1272)  | 0.2025 | 0.9999 |
| MEHP      | myo-Inositol                 | 0.0110 (-0.0576, 0.0796)  | 0.7501 | 0.9701 | -0.0081 (-0.0801, 0.0640) | 0.8239 | 0.9999 |
| MEHP      | N,N-Dimethylglycine          | 0.0043 (-0.0582, 0.0668)  | 0.8914 | 0.9756 | 0.0035 (-0.0621, 0.0691)  | 0.9157 | 0.9999 |
| MEHP      | O-Acetylcarnitine            | -0.0494 (-0.1168, 0.0179) | 0.1483 | 0.9330 | -0.0599 (-0.1282, 0.0084) | 0.0847 | 0.9999 |
| MEHP      | Ornithine                    | 0.0916 (-0.0069, 0.1902)  | 0.0680 | 0.9330 | 0.0681 (-0.0318, 0.1681)  | 0.1791 | 0.9999 |
| MEHP      | Phenylalanine                | 0.0379 (-0.0281, 0.1038)  | 0.2571 | 0.9330 | 0.0345 (-0.0334, 0.1023)  | 0.3160 | 0.9999 |
| MEHP      | Proline                      | 0.0797 ( 0.0020, 0.1574)  | 0.0445 | 0.9330 | 0.0808 ( 0.0005, 0.1612)  | 0.0486 | 0.9999 |
| MEHP      | Pyruvate                     | 0.1352 (-0.0060, 0.2764)  | 0.0603 | 0.9330 | 0.1235 (-0.0196, 0.2666)  | 0.0900 | 0.9999 |
| MEHP      | Serine                       | 0.0446 (-0.0259, 0.1151)  | 0.2122 | 0.9330 | 0.0448 (-0.0256, 0.1153)  | 0.2096 | 0.9999 |
| MEHP      | Taurine                      | 0.1097 (-0.0161, 0.2356)  | 0.0867 | 0.9330 | 0.1056 (-0.0194, 0.2306)  | 0.0968 | 0.9999 |
| MEHP      | Threonine                    | 0.0618 (-0.0494, 0.1730)  | 0.2726 | 0.9330 | 0.0599 (-0.0559, 0.1757)  | 0.3072 | 0.9999 |
| MEHP      | Tyrosine                     | 0.0642 (-0.0140, 0.1423)  | 0.1067 | 0.9330 | 0.0550 (-0.0244, 0.1344)  | 0.1724 | 0.9999 |
| MEHP      | Urea                         | 0.0479 (-0.0465, 0.1423)  | 0.3163 | 0.9330 | 0.0310 (-0.0631, 0.1251)  | 0.5146 | 0.9999 |
| MEHP      | Valine                       | 0.0369 (-0.0354, 0.1091)  | 0.3136 | 0.9330 | 0.0366 (-0.0372, 0.1104)  | 0.3274 | 0.9999 |
| MEOHP     | 2-Hydroxybutyrate            | 0.0050 (-0.1178, 0.1279)  | 0.9353 | 0.9901 | 0.0118 (-0.1160, 0.1397)  | 0.8546 | 0.9999 |
| MEOHP     | 2-Hydroxyisobutyrate         | 0.0056 (-0.0566, 0.0679)  | 0.8581 | 0.9701 | 0.0014 (-0.0641, 0.0669)  | 0.9658 | 0.9999 |
| MEOHP     | 2-Hydroxyisovalerate         | 0.0282 (-0.0417, 0.0981)  | 0.4259 | 0.9462 | 0.0263 (-0.0455, 0.0981)  | 0.4689 | 0.9999 |
| MEOHP     | 2-Oxoglutarate               | 0.0069 (-0.0687, 0.0826)  | 0.8561 | 0.9701 | 0.0235 (-0.0532, 0.1002)  | 0.5448 | 0.9999 |
| MEOHP     | 2-Oxoisocaproate             | -0.0430 (-0.1229, 0.0369) | 0.2881 | 0.9330 | -0.0432 (-0.1268, 0.0403) | 0.3067 | 0.9999 |
| MEOHP     | 3-Hydroxybutyrate            | -0.0255 (-0.2368, 0.1859) | 0.8115 | 0.9701 | -0.0389 (-0.2496, 0.1718) | 0.7146 | 0.9999 |
| MEOHP     | 3-Hydroxyisobutyrate         | 0.0336 (-0.0719, 0.1390)  | 0.5293 | 0.9556 | 0.0145 (-0.0862, 0.1152)  | 0.7757 | 0.9999 |
| MEOHP     | 3-Hydroxyisovalerate         | -0.0350 (-0.0970, 0.0270) | 0.2655 | 0.9330 | -0.0276 (-0.0902, 0.0349) | 0.3828 | 0.9999 |
| MEOHP     | 3-Methyl-2-oxo-butanoic acid | -0.0192 (-0.0808, 0.0423) | 0.5370 | 0.9556 | -0.0191 (-0.0840, 0.0458) | 0.5608 | 0.9999 |
| MEOHP     | Acetate                      | 0.0004 (-0.1053, 0.1060)  | 0.9947 | 0.9964 | 0.0000 (-0.1079, 0.1079)  | 0.9999 | 0.9999 |
| MEOHP     | Acetoacetate                 | -0.0309 (-0.1869, 0.1251) | 0.6951 | 0.9701 | -0.0362 (-0.1959, 0.1235) | 0.6537 | 0.9999 |
| MEOHP     | Acetone                      | 0.0872 (-0.0265, 0.2008)  | 0.1312 | 0.9330 | 0.0753 (-0.0388, 0.1893)  | 0.1935 | 0.9999 |
| MEOHP     | Alanine                      | 0.0509 (-0.0031, 0.1049)  | 0.0642 | 0.9330 | 0.0521 (-0.0031, 0.1074)  | 0.0642 | 0.9999 |
| MEOHP     | Arginine                     | -0.0016 (-0.0817, 0.0785) | 0.9683 | 0.9924 | -0.0071 (-0.0901, 0.0759) | 0.8648 | 0.9999 |
| MEOHP     | Asparagine                   | 0.0482 (-0.0279, 0.1242)  | 0.2118 | 0.9330 | 0.0320 (-0.0435, 0.1075)  | 0.4019 | 0.9999 |
| MEOHP     | Aspartate                    | 0.0204 (-0.0940, 0.1348)  | 0.7237 | 0.9701 | -0.0024 (-0.1154, 0.1105) | 0.9657 | 0.9999 |
| MEOHP     | Betaine                      | 0.0238 (-0.0384, 0.0861)  | 0.4496 | 0.9556 | 0.0224 (-0.0438, 0.0887)  | 0.5030 | 0.9999 |
| MEOHP     | Carnitine                    | 0.0032 (-0.0609, 0.0673)  | 0.9214 | 0.9829 | 0.0076 (-0.0588, 0.0739)  | 0.8214 | 0.9999 |
| MEOHP     | Choline                      | 0.0705 ( 0.0005, 0.1406)  | 0.0485 | 0.9330 | 0.0640 (-0.0079, 0.1359)  | 0.0805 | 0.9999 |
| MEOHP     | Citrate                      | 0.0363 (-0.0329, 0.1054)  | 0.3002 | 0.9330 | 0.0485 (-0.0196, 0.1166)  | 0.1608 | 0.9999 |
| MEOHP     | Creatine                     | -0.0220 (-0.1344, 0.0904) | 0.6987 | 0.9701 | -0.0437 (-0.1578, 0.0705) | 0.4494 | 0.9999 |
| MEOHP     | Creatinine                   | 0.0249 (-0.0290, 0.0787)  | 0.3621 | 0.9330 | 0.0234 (-0.0322, 0.0791)  | 0.4054 | 0.9999 |
| MEOHP     | Cystine                      | -0.0096 (-0.1062, 0.0869) | 0.8433 | 0.9701 | 0.0057 (-0.0957, 0.1070)  | 0.9120 | 0.9999 |
| MEOHP     | Dimethyl sulfone             | 0.0397 (-0.0798, 0.1593)  | 0.5110 | 0.9556 | 0.0045 (-0.1120, 0.1211)  | 0.9388 | 0.9999 |
| MEOHP     | Formate                      | 0.0254 (-0.0392, 0.0901)  | 0.4373 | 0.9542 | 0.0186 (-0.0474, 0.0846)  | 0.5773 | 0.9999 |

| Phthalate | Metabolite                   | Total Effect               |        | Direct Effect |                            |        |        |
|-----------|------------------------------|----------------------------|--------|---------------|----------------------------|--------|--------|
|           |                              | Estimate (95% CI)          | p      | FDR p         | Estimate (95% CI)          | p      | FDR p  |
| MEOHP     | Glucose                      | -0.0557 (-0.1227, 0.0113)  | 0.1024 | 0.9330        | -0.0405 (-0.1096, 0.0286)  | 0.2479 | 0.9999 |
| MEOHP     | Glutamate                    | 0.0744 (-0.0375, 0.1863)   | 0.1899 | 0.9330        | 0.0743 (-0.0396, 0.1881)   | 0.1984 | 0.9999 |
| MEOHP     | Glutamine                    | -0.0208 (-0.0664, 0.0249)  | 0.3690 | 0.9330        | -0.0275 (-0.0746, 0.0196)  | 0.2498 | 0.9999 |
| MEOHP     | Glycine                      | 0.0352 (-0.0339, 0.1043)   | 0.3149 | 0.9330        | 0.0260 (-0.0451, 0.0971)   | 0.4702 | 0.9999 |
| MEOHP     | Isoleucine                   | 0.0086 (-0.0805, 0.0976)   | 0.8490 | 0.9701        | 0.0013 (-0.0898, 0.0923)   | 0.9777 | 0.9999 |
| MEOHP     | Lactate                      | 0.0667 (-0.0108, 0.1443)   | 0.0907 | 0.9330        | 0.0662 (-0.0126, 0.1450)   | 0.0986 | 0.9999 |
| MEOHP     | Leucine                      | 0.0122 (-0.0641, 0.0884)   | 0.7523 | 0.9701        | 0.0006 (-0.0764, 0.0777)   | 0.9870 | 0.9999 |
| MEOHP     | Lysine                       | 0.0129 (-0.0641, 0.0899)   | 0.7399 | 0.9701        | -0.0004 (-0.0789, 0.0782)  | 0.9929 | 0.9999 |
| MEOHP     | Methanol                     | -0.1284 (-0.2999, 0.0431)  | 0.1405 | 0.9330        | -0.1577 (-0.3317, 0.0163)  | 0.0751 | 0.9999 |
| MEOHP     | Methionine                   | 0.0238 (-0.0502, 0.0978)   | 0.5245 | 0.9556        | 0.0067 (-0.0685, 0.0818)   | 0.8603 | 0.9999 |
| MEOHP     | myo-Inositol                 | 0.0072 (-0.0595, 0.0740)   | 0.8307 | 0.9701        | -0.0032 (-0.0727, 0.0663)  | 0.9275 | 0.9999 |
| MEOHP     | N,N-Dimethylglycine          | 0.0158 (-0.0449, 0.0765)   | 0.6067 | 0.9623        | 0.0107 (-0.0525, 0.0739)   | 0.7378 | 0.9999 |
| MEOHP     | O-Acetylcarnitine            | -0.0055 (-0.0717, 0.0607)  | 0.8696 | 0.9701        | -0.0193 (-0.0861, 0.0475)  | 0.5670 | 0.9999 |
| MEOHP     | Ornithine                    | 0.0574 (-0.0394, 0.1542)   | 0.2424 | 0.9330        | 0.0316 (-0.0655, 0.1288)   | 0.5194 | 0.9999 |
| MEOHP     | Phenylalanine                | 0.0308 (-0.0335, 0.0950)   | 0.3443 | 0.9330        | 0.0171 (-0.0486, 0.0828)   | 0.6072 | 0.9999 |
| MEOHP     | Proline                      | 0.0418 (-0.0349, 0.1185)   | 0.2825 | 0.9330        | 0.0404 (-0.0383, 0.1191)   | 0.3103 | 0.9999 |
| MEOHP     | Pyruvate                     | 0.1289 (-0.0085, 0.2663)   | 0.0657 | 0.9330        | 0.1430 (0.0059, 0.2802)    | 0.0411 | 0.9999 |
| MEOHP     | Serine                       | 0.0518 (-0.0165, 0.1202)   | 0.1353 | 0.9330        | 0.0378 (-0.0303, 0.1059)   | 0.2733 | 0.9999 |
| MEOHP     | Taurine                      | 0.0814 (-0.0418, 0.2046)   | 0.1927 | 0.9330        | 0.0488 (-0.0731, 0.1707)   | 0.4289 | 0.9999 |
| MEOHP     | Threonine                    | 0.0490 (-0.0594, 0.1574)   | 0.3715 | 0.9330        | 0.0321 (-0.0801, 0.1443)   | 0.5712 | 0.9999 |
| MEOHP     | Tyrosine                     | 0.0229 (-0.0541, 0.0998)   | 0.5567 | 0.9556        | 0.0136 (-0.0637, 0.0910)   | 0.7274 | 0.9999 |
| MEOHP     | Urea                         | 0.0411 (-0.0508, 0.1330)   | 0.3773 | 0.9330        | 0.0215 (-0.0694, 0.1125)   | 0.6391 | 0.9999 |
| MEOHP     | Valine                       | 0.0346 (-0.0357, 0.1050)   | 0.3306 | 0.9330        | 0.0299 (-0.0414, 0.1012)   | 0.4074 | 0.9999 |
| MEP       | 2-Hydroxybutyrate            | -0.0689 (-0.1563, 0.0185)  | 0.1208 | 0.9330        | -0.0576 (-0.1482, 0.0329)  | 0.2097 | 0.9999 |
| MEP       | 2-Hydroxyisobutyrate         | -0.0053 (-0.0501, 0.0395)  | 0.8139 | 0.9701        | 0.0000 (-0.0468, 0.0468)   | 0.9999 | 0.9999 |
| MEP       | 2-Hydroxyisovalerate         | -0.0225 (-0.0728, 0.0278)  | 0.3762 | 0.9330        | -0.0172 (-0.0685, 0.0341)  | 0.5079 | 0.9999 |
| MEP       | 2-Oxoglutarate               | -0.0220 (-0.0763, 0.0322)  | 0.4224 | 0.9462        | -0.0096 (-0.0644, 0.0452)  | 0.7288 | 0.9999 |
| MEP       | 2-Oxoisocaproate             | -0.0444 (-0.1016, 0.0127)  | 0.1260 | 0.9330        | -0.0388 (-0.0983, 0.0207)  | 0.1985 | 0.9999 |
| MEP       | 3-Hydroxybutyrate            | -0.1732 (-0.3214, -0.0251) | 0.0224 | 0.9330        | -0.1625 (-0.3095, -0.0156) | 0.0305 | 0.9999 |
| MEP       | 3-Hydroxyisobutyrate         | -0.0211 (-0.0970, 0.0549)  | 0.5832 | 0.9556        | -0.0246 (-0.0964, 0.0472)  | 0.4986 | 0.9999 |
| MEP       | 3-Hydroxyisovalerate         | -0.0087 (-0.0536, 0.0361)  | 0.6997 | 0.9701        | 0.0028 (-0.0420, 0.0477)   | 0.8999 | 0.9999 |
| MEP       | 3-Methyl-2-oxo-butanoic acid | -0.0418 (-0.0854, 0.0018)  | 0.0598 | 0.9330        | -0.0393 (-0.0850, 0.0065)  | 0.0917 | 0.9999 |
| MEP       | Acetate                      | 0.0260 (-0.0499, 0.1018)   | 0.4990 | 0.9556        | 0.0114 (-0.0657, 0.0885)   | 0.7696 | 0.9999 |
| MEP       | Acetoacetate                 | -0.1543 (-0.2623, -0.0462) | 0.0056 | 0.9330        | -0.1487 (-0.2588, -0.0385) | 0.0087 | 0.9999 |
| MEP       | Acetone                      | -0.0463 (-0.1286, 0.0359)  | 0.2666 | 0.9330        | -0.0383 (-0.1202, 0.0435)  | 0.3550 | 0.9999 |
| MEP       | Alanine                      | 0.0194 (-0.0200, 0.0588)   | 0.3309 | 0.9330        | 0.0121 (-0.0280, 0.0522)   | 0.5521 | 0.9999 |
| MEP       | Arginine                     | -0.0020 (-0.0597, 0.0557)  | 0.9445 | 0.9901        | 0.0057 (-0.0535, 0.0650)   | 0.8481 | 0.9999 |
| MEP       | Asparagine                   | 0.0116 (-0.0436, 0.0667)   | 0.6777 | 0.9701        | 0.0000 (-0.0541, 0.0541)   | 0.9995 | 0.9999 |
| MEP       | Aspartate                    | 0.0194 (-0.0630, 0.1017)   | 0.6417 | 0.9690        | 0.0189 (-0.0617, 0.0994)   | 0.6427 | 0.9999 |
| MEP       | Betaine                      | 0.0242 (-0.0204, 0.0689)   | 0.2844 | 0.9330        | 0.0369 (-0.0099, 0.0838)   | 0.1208 | 0.9999 |
| MEP       | Carnitine                    | 0.0426 (-0.0028, 0.0879)   | 0.0654 | 0.9330        | 0.0446 (-0.0019, 0.0911)   | 0.0600 | 0.9999 |
| MEP       | Choline                      | 0.0271 (-0.0241, 0.0783)   | 0.2958 | 0.9330        | 0.0365 (-0.0151, 0.0882)   | 0.1634 | 0.9999 |
| MEP       | Citrate                      | 0.0099 (-0.0401, 0.0599)   | 0.6957 | 0.9701        | 0.0235 (-0.0255, 0.0724)   | 0.3436 | 0.9999 |
| MEP       | Creatine                     | -0.0015 (-0.0825, 0.0795)  | 0.9703 | 0.9924        | 0.0003 (-0.0815, 0.0820)   | 0.9946 | 0.9999 |
| MEP       | Creatinine                   | 0.0321 (-0.0063, 0.0705)   | 0.1006 | 0.9330        | 0.0343 (-0.0050, 0.0736)   | 0.0867 | 0.9999 |
| MEP       | Cystine                      | -0.0118 (-0.0813, 0.0577)  | 0.7362 | 0.9701        | -0.0061 (-0.0785, 0.0663)  | 0.8667 | 0.9999 |
| MEP       | Dimethyl sulfone             | 0.0681 (-0.0171, 0.1533)   | 0.1159 | 0.9330        | 0.0434 (-0.0394, 0.1261)   | 0.3011 | 0.9999 |
| MEP       | Formate                      | 0.0130 (-0.0336, 0.0597)   | 0.5802 | 0.9556        | 0.0039 (-0.0433, 0.0511)   | 0.8702 | 0.9999 |
| MEP       | Glucose                      | -0.0016 (-0.0505, 0.0473)  | 0.9498 | 0.9901        | -0.0014 (-0.0511, 0.0483)  | 0.9547 | 0.9999 |
| MEP       | Glutamate                    | -0.0118 (-0.0931, 0.0694)  | 0.7729 | 0.9701        | -0.0103 (-0.0922, 0.0717)  | 0.8044 | 0.9999 |
| MEP       | Glutamine                    | 0.0162 (-0.0167, 0.0490)   | 0.3313 | 0.9330        | 0.0197 (-0.0140, 0.0533)   | 0.2490 | 0.9999 |
| MEP       | Glycine                      | 0.0492 (0.0001, 0.0982)    | 0.0493 | 0.9330        | 0.0493 (-0.0006, 0.0992)   | 0.0529 | 0.9999 |
| MEP       | Isoleucine                   | -0.0116 (-0.0757, 0.0524)  | 0.7192 | 0.9701        | -0.0117 (-0.0767, 0.0533)  | 0.7221 | 0.9999 |
| MEP       | Lactate                      | 0.0138 (-0.0428, 0.0703)   | 0.6295 | 0.9677        | 0.0078 (-0.0493, 0.0649)   | 0.7866 | 0.9999 |
| MEP       | Leucine                      | -0.0068 (-0.0617, 0.0481)  | 0.8056 | 0.9701        | -0.0058 (-0.0608, 0.0492)  | 0.8347 | 0.9999 |
| MEP       | Lysine                       | 0.0067 (-0.0488, 0.0621)   | 0.8121 | 0.9701        | 0.0108 (-0.0453, 0.0668)   | 0.7037 | 0.9999 |
| MEP       | Methanol                     | -0.0362 (-0.1608, 0.0884)  | 0.5657 | 0.9556        | -0.0602 (-0.1860, 0.0655)  | 0.3441 | 0.9999 |
| MEP       | Methionine                   | 0.0172 (-0.0361, 0.0705)   | 0.5230 | 0.9556        | 0.0104 (-0.0433, 0.0640)   | 0.7017 | 0.9999 |
| MEP       | myo-Inositol                 | -0.0201 (-0.0680, 0.0278)  | 0.4080 | 0.9453        | -0.0315 (-0.0808, 0.0177)  | 0.2071 | 0.9999 |
| MEP       | N,N-Dimethylglycine          | 0.0213 (-0.0223, 0.0649)   | 0.3343 | 0.9330        | 0.0259 (-0.0190, 0.0708)   | 0.2547 | 0.9999 |

| Phthalate | Metabolite                   | Total Effect               |        |        | Direct Effect              |        |        |
|-----------|------------------------------|----------------------------|--------|--------|----------------------------|--------|--------|
|           |                              | Estimate (95% CI)          | p      | FDR p  | Estimate (95% CI)          | p      | FDR p  |
| MEP       | O-Acetylcarnitine            | -0.0107 (-0.0583, 0.0369)  | 0.6573 | 0.9701 | -0.0095 (-0.0573, 0.0382)  | 0.6935 | 0.9999 |
| MEP       | Ornithine                    | 0.0390 (-0.0307, 0.1088)   | 0.2696 | 0.9330 | 0.0209 (-0.0485, 0.0903)   | 0.5505 | 0.9999 |
| MEP       | Phenylalanine                | 0.0437 (-0.0020, 0.0893)   | 0.0605 | 0.9330 | 0.0436 (-0.0026, 0.0897)   | 0.0640 | 0.9999 |
| MEP       | Proline                      | 0.0179 (-0.0375, 0.0734)   | 0.5228 | 0.9556 | 0.0164 (-0.0400, 0.0728)   | 0.5658 | 0.9999 |
| MEP       | Pyruvate                     | 0.0373 (-0.0631, 0.1377)   | 0.4623 | 0.9556 | 0.0118 (-0.0883, 0.1119)   | 0.8156 | 0.9999 |
| MEP       | Serine                       | 0.0275 (-0.0219, 0.0770)   | 0.2717 | 0.9330 | 0.0271 (-0.0215, 0.0758)   | 0.2714 | 0.9999 |
| MEP       | Taurine                      | 0.0210 (-0.0683, 0.1104)   | 0.6418 | 0.9690 | 0.0172 (-0.0701, 0.1045)   | 0.6966 | 0.9999 |
| MEP       | Threonine                    | -0.0169 (-0.0952, 0.0614)  | 0.6694 | 0.9701 | -0.0150 (-0.0952, 0.0652)  | 0.7114 | 0.9999 |
| MEP       | Tyrosine                     | 0.0219 (-0.0334, 0.0772)   | 0.4347 | 0.9514 | 0.0132 (-0.0420, 0.0684)   | 0.6364 | 0.9999 |
| MEP       | Urea                         | -0.0018 (-0.0683, 0.0646)  | 0.9562 | 0.9901 | -0.0102 (-0.0751, 0.0548)  | 0.7567 | 0.9999 |
| MEP       | Valine                       | -0.0090 (-0.0598, 0.0418)  | 0.7257 | 0.9701 | -0.0115 (-0.0625, 0.0396)  | 0.6561 | 0.9999 |
| MHBP      | 2-Hydroxybutyrate            | -0.0532 (-0.3298, 0.2233)  | 0.7032 | 0.9701 | -0.0233 (-0.3037, 0.2571)  | 0.8691 | 0.9999 |
| MHBP      | 2-Hydroxyisobutyrate         | -0.0726 (-0.2121, 0.0669)  | 0.3040 | 0.9330 | -0.0580 (-0.2012, 0.0851)  | 0.4232 | 0.9999 |
| MHBP      | 2-Hydroxyisovalerate         | -0.0640 (-0.2214, 0.0934)  | 0.4219 | 0.9462 | -0.0566 (-0.2142, 0.1010)  | 0.4775 | 0.9999 |
| MHBP      | 2-Oxoglutarate               | -0.0273 (-0.1976, 0.1429)  | 0.7509 | 0.9701 | -0.0142 (-0.1827, 0.1543)  | 0.8677 | 0.9999 |
| MHBP      | 2-Oxoisocaproate             | -0.0976 (-0.2775, 0.0822)  | 0.2841 | 0.9330 | -0.0806 (-0.2641, 0.1029)  | 0.3854 | 0.9999 |
| MHBP      | 3-Hydroxybutyrate            | 0.0848 (-0.3909, 0.5606)   | 0.7242 | 0.9701 | 0.0824 (-0.3797, 0.5445)   | 0.7243 | 0.9999 |
| MHBP      | 3-Hydroxyisobutyrate         | -0.1198 (-0.3566, 0.1170)  | 0.3178 | 0.9330 | -0.1262 (-0.3458, 0.0933)  | 0.2565 | 0.9999 |
| MHBP      | 3-Hydroxyisovalerate         | -0.0326 (-0.1729, 0.1078)  | 0.6464 | 0.9690 | -0.0242 (-0.1619, 0.1134)  | 0.7274 | 0.9999 |
| MHBP      | 3-Methyl-2-oxo-butanoic acid | -0.1254 (-0.2620, 0.0111)  | 0.0714 | 0.9330 | -0.1105 (-0.2514, 0.0303)  | 0.1225 | 0.9999 |
| MHBP      | Acetate                      | -0.0947 (-0.3320, 0.1425)  | 0.4301 | 0.9473 | -0.0890 (-0.3250, 0.1471)  | 0.4562 | 0.9999 |
| MHBP      | Acetoacetate                 | 0.0435 (-0.3080, 0.3951)   | 0.8064 | 0.9701 | 0.0479 (-0.3026, 0.3984)   | 0.7868 | 0.9999 |
| MHBP      | Acetone                      | 0.1458 (-0.1116, 0.4031)   | 0.2637 | 0.9330 | 0.1433 (-0.1074, 0.3941)   | 0.2594 | 0.9999 |
| MHBP      | Alanine                      | -0.0689 (-0.1920, 0.0541)  | 0.2688 | 0.9330 | -0.0759 (-0.1983, 0.0465)  | 0.2214 | 0.9999 |
| MHBP      | Arginine                     | -0.1025 (-0.2818, 0.0768)  | 0.2594 | 0.9330 | -0.0916 (-0.2727, 0.0895)  | 0.3181 | 0.9999 |
| MHBP      | Asparagine                   | 0.0261 (-0.1465, 0.1987)   | 0.7644 | 0.9701 | 0.0309 (-0.1351, 0.1969)   | 0.7129 | 0.9999 |
| MHBP      | Aspartate                    | 0.0489 (-0.2088, 0.3065)   | 0.7073 | 0.9701 | 0.0303 (-0.2172, 0.2779)   | 0.8083 | 0.9999 |
| MHBP      | Betaine                      | -0.0444 (-0.1847, 0.0959)  | 0.5317 | 0.9556 | -0.0228 (-0.1684, 0.1227)  | 0.7563 | 0.9999 |
| MHBP      | Carnitine                    | -0.0740 (-0.2176, 0.0696)  | 0.3091 | 0.9330 | -0.0708 (-0.2156, 0.0741)  | 0.3344 | 0.9999 |
| MHBP      | Choline                      | -0.0582 (-0.2187, 0.1024)  | 0.4737 | 0.9556 | -0.0448 (-0.2048, 0.1152)  | 0.5798 | 0.9999 |
| MHBP      | Citrate                      | -0.0162 (-0.1728, 0.1403)  | 0.8373 | 0.9701 | -0.0010 (-0.1520, 0.1500)  | 0.9893 | 0.9999 |
| MHBP      | Creatine                     | -0.0358 (-0.2891, 0.2175)  | 0.7796 | 0.9701 | -0.0357 (-0.2866, 0.2152)  | 0.7782 | 0.9999 |
| MHBP      | Creatinine                   | 0.0216 (-0.1002, 0.1433)   | 0.7261 | 0.9701 | 0.0277 (-0.0947, 0.1501)   | 0.6544 | 0.9999 |
| MHBP      | Cystine                      | 0.0114 (-0.2062, 0.2290)   | 0.9175 | 0.9818 | 0.0323 (-0.1899, 0.2546)   | 0.7734 | 0.9999 |
| MHBP      | Dimethyl sulfone             | -0.1586 (-0.4265, 0.1094)  | 0.2431 | 0.9330 | -0.1628 (-0.4164, 0.0907)  | 0.2054 | 0.9999 |
| MHBP      | Formate                      | -0.0586 (-0.2042, 0.0870)  | 0.4266 | 0.9462 | -0.0619 (-0.2064, 0.0826)  | 0.3974 | 0.9999 |
| MHBP      | Glucose                      | -0.0869 (-0.2389, 0.0651)  | 0.2594 | 0.9330 | -0.0844 (-0.2361, 0.0672)  | 0.2719 | 0.9999 |
| MHBP      | Glutamate                    | 0.0013 (-0.2529, 0.2555)   | 0.9920 | 0.9964 | -0.0038 (-0.2556, 0.2480)  | 0.9763 | 0.9999 |
| MHBP      | Glutamine                    | -0.0336 (-0.1366, 0.0694)  | 0.5192 | 0.9556 | -0.0331 (-0.1370, 0.0708)  | 0.5284 | 0.9999 |
| MHBP      | Glycine                      | -0.0433 (-0.1995, 0.1129)  | 0.5834 | 0.9556 | -0.0443 (-0.2004, 0.1119)  | 0.5750 | 0.9999 |
| MHBP      | Isoleucine                   | -0.0245 (-0.2251, 0.1761)  | 0.8088 | 0.9701 | -0.0292 (-0.2288, 0.1704)  | 0.7723 | 0.9999 |
| MHBP      | Lactate                      | 0.0727 (-0.1038, 0.2493)   | 0.4157 | 0.9462 | 0.0677 (-0.1070, 0.2425)   | 0.4437 | 0.9999 |
| MHBP      | Leucine                      | -0.0292 (-0.2009, 0.1425)  | 0.7367 | 0.9701 | -0.0321 (-0.2010, 0.1369)  | 0.7072 | 0.9999 |
| MHBP      | Lysine                       | -0.0145 (-0.1880, 0.1591)  | 0.8689 | 0.9701 | -0.0182 (-0.1904, 0.1540)  | 0.8344 | 0.9999 |
| MHBP      | Methanol                     | -0.5183 (-0.8948, -0.1418) | 0.0075 | 0.9330 | -0.5258 (-0.8989, -0.1527) | 0.0062 | 0.9999 |
| MHBP      | Methionine                   | -0.0231 (-0.1900, 0.1438)  | 0.7840 | 0.9701 | -0.0277 (-0.1925, 0.1370)  | 0.7389 | 0.9999 |
| MHBP      | myo-Inositol                 | -0.0418 (-0.1919, 0.1083)  | 0.5817 | 0.9556 | -0.0362 (-0.1885, 0.1162)  | 0.6384 | 0.9999 |
| MHBP      | N,N-Dimethylglycine          | -0.0718 (-0.2080, 0.0643)  | 0.2977 | 0.9330 | -0.0567 (-0.1950, 0.0816)  | 0.4176 | 0.9999 |
| MHBP      | O-Acetylcarnitine            | -0.0153 (-0.1643, 0.1338)  | 0.8394 | 0.9701 | -0.0065 (-0.1532, 0.1402)  | 0.9302 | 0.9999 |
| MHBP      | Ornithine                    | 0.0708 (-0.1483, 0.2899)   | 0.5231 | 0.9556 | 0.0508 (-0.1624, 0.2641)   | 0.6373 | 0.9999 |
| MHBP      | Phenylalanine                | 0.0038 (-0.1416, 0.1491)   | 0.9593 | 0.9901 | 0.0003 (-0.1441, 0.1446)   | 0.9969 | 0.9999 |
| MHBP      | Proline                      | 0.0530 (-0.1205, 0.2265)   | 0.5456 | 0.9556 | 0.0521 (-0.1210, 0.2253)   | 0.5514 | 0.9999 |
| MHBP      | Pyruvate                     | 0.0346 (-0.2803, 0.3494)   | 0.8280 | 0.9701 | 0.0148 (-0.2926, 0.3222)   | 0.9241 | 0.9999 |
| MHBP      | Serine                       | 0.0124 (-0.1432, 0.1680)   | 0.8748 | 0.9701 | 0.0039 (-0.1465, 0.1542)   | 0.9595 | 0.9999 |
| MHBP      | Taurine                      | 0.0999 (-0.1792, 0.3791)   | 0.4791 | 0.9556 | 0.0829 (-0.1849, 0.3507)   | 0.5404 | 0.9999 |
| MHBP      | Threonine                    | 0.0401 (-0.2049, 0.2851)   | 0.7459 | 0.9701 | 0.0482 (-0.1981, 0.2944)   | 0.6986 | 0.9999 |
| MHBP      | Tyrosine                     | 0.0022 (-0.1714, 0.1757)   | 0.9803 | 0.9964 | -0.0013 (-0.1711, 0.1684)  | 0.9875 | 0.9999 |
| MHBP      | Urea                         | 0.0128 (-0.1950, 0.2206)   | 0.9027 | 0.9782 | 0.0191 (-0.1805, 0.2187)   | 0.8500 | 0.9999 |
| MHBP      | Valine                       | -0.0163 (-0.1754, 0.1427)  | 0.8389 | 0.9701 | -0.0198 (-0.1767, 0.1371)  | 0.8023 | 0.9999 |
| MHiBP     | 2-Hydroxybutyrate            | -0.0453 (-0.2054, 0.1148)  | 0.5760 | 0.9556 | -0.0252 (-0.1948, 0.1445)  | 0.7690 | 0.9999 |

| Phthalate | Metabolite                   | Total Effect              |          | Direct Effect |                            |          |              |
|-----------|------------------------------|---------------------------|----------|---------------|----------------------------|----------|--------------|
|           |                              | Estimate (95% CI)         | <i>p</i> | FDR <i>p</i>  | Estimate (95% CI)          | <i>p</i> | FDR <i>p</i> |
| MHiBP     | 2-Hydroxyisobutyrate         | -0.0567 (-0.1372, 0.0237) | 0.1650   | 0.9330        | -0.0545 (-0.1407, 0.0317)  | 0.2123   | 0.9999       |
| MHiBP     | 2-Hydroxyisovalerate         | -0.0516 (-0.1425, 0.0393) | 0.2630   | 0.9330        | -0.0493 (-0.1443, 0.0458)  | 0.3063   | 0.9999       |
| MHiBP     | 2-Oxoglutarate               | -0.0619 (-0.1598, 0.0360) | 0.2125   | 0.9330        | -0.0335 (-0.1353, 0.0682)  | 0.5144   | 0.9999       |
| MHiBP     | 2-Oxoisocaproate             | -0.0138 (-0.1186, 0.0910) | 0.7949   | 0.9701        | -0.0002 (-0.1116, 0.1113)  | 0.9977   | 0.9999       |
| MHiBP     | 3-Hydroxybutyrate            | 0.1459 (-0.1285, 0.4202)  | 0.2939   | 0.9330        | 0.1932 (-0.0838, 0.4703)   | 0.1695   | 0.9999       |
| MHiBP     | 3-Hydroxyisobutyrate         | -0.0957 (-0.2322, 0.0409) | 0.1677   | 0.9330        | -0.1273 (-0.2585, 0.0039)  | 0.0571   | 0.9999       |
| MHiBP     | 3-Hydroxyisovalerate         | -0.0427 (-0.1237, 0.0383) | 0.2983   | 0.9330        | -0.0202 (-0.1035, 0.0630)  | 0.6307   | 0.9999       |
| MHiBP     | 3-Methyl-2-oxo-butanoic acid | -0.0392 (-0.1193, 0.0409) | 0.3342   | 0.9330        | -0.0355 (-0.1215, 0.0505)  | 0.4144   | 0.9999       |
| MHiBP     | Acetate                      | 0.0563 (-0.0811, 0.1938)  | 0.4179   | 0.9462        | 0.0286 (-0.1145, 0.1717)   | 0.6924   | 0.9999       |
| MHiBP     | Acetoacetate                 | 0.0569 (-0.1465, 0.2603)  | 0.5801   | 0.9556        | 0.0853 (-0.1262, 0.2968)   | 0.4252   | 0.9999       |
| MHiBP     | Acetone                      | 0.1202 (-0.0279, 0.2683)  | 0.1105   | 0.9330        | 0.1297 (-0.0208, 0.2801)   | 0.0904   | 0.9999       |
| MHiBP     | Alanine                      | -0.0084 (-0.0801, 0.0633) | 0.8175   | 0.9701        | -0.0250 (-0.0995, 0.0495)  | 0.5065   | 0.9999       |
| MHiBP     | Arginine                     | -0.0574 (-0.1613, 0.0466) | 0.2762   | 0.9330        | -0.0490 (-0.1587, 0.0607)  | 0.3772   | 0.9999       |
| MHiBP     | Asparagine                   | 0.0407 (-0.0590, 0.1404)  | 0.4200   | 0.9462        | 0.0069 (-0.0936, 0.1074)   | 0.8917   | 0.9999       |
| MHiBP     | Aspartate                    | -0.0190 (-0.1684, 0.1303) | 0.8012   | 0.9701        | -0.0327 (-0.1824, 0.1170)  | 0.6654   | 0.9999       |
| MHiBP     | Betaine                      | -0.0408 (-0.1218, 0.0403) | 0.3209   | 0.9330        | -0.0276 (-0.1155, 0.0604)  | 0.5350   | 0.9999       |
| MHiBP     | Carnitine                    | -0.0543 (-0.1372, 0.0287) | 0.1973   | 0.9330        | -0.0553 (-0.1427, 0.0320)  | 0.2118   | 0.9999       |
| MHiBP     | Choline                      | -0.0217 (-0.1149, 0.0714) | 0.6445   | 0.9690        | -0.0178 (-0.1147, 0.0791)  | 0.7161   | 0.9999       |
| MHiBP     | Citrate                      | -0.0466 (-0.1368, 0.0437) | 0.3082   | 0.9330        | -0.0276 (-0.1187, 0.0636)  | 0.5500   | 0.9999       |
| MHiBP     | Creatine                     | -0.0399 (-0.1865, 0.1067) | 0.5901   | 0.9556        | -0.0603 (-0.2117, 0.0911)  | 0.4309   | 0.9999       |
| MHiBP     | Creatinine                   | 0.0043 (-0.0663, 0.0749)  | 0.9040   | 0.9782        | 0.0024 (-0.0718, 0.0765)   | 0.9489   | 0.9999       |
| MHiBP     | Cystine                      | -0.0352 (-0.1611, 0.0906) | 0.5797   | 0.9556        | -0.0206 (-0.1550, 0.1139)  | 0.7622   | 0.9999       |
| MHiBP     | Dimethyl sulfone             | -0.0595 (-0.2154, 0.0964) | 0.4506   | 0.9556        | -0.1352 (-0.2875, 0.0170)  | 0.0811   | 0.9999       |
| MHiBP     | Formate                      | 0.0119 (-0.0727, 0.0965)  | 0.7807   | 0.9701        | -0.0124 (-0.1002, 0.0753)  | 0.7791   | 0.9999       |
| MHiBP     | Glucose                      | -0.0378 (-0.1261, 0.0505) | 0.3974   | 0.9389        | -0.0283 (-0.1205, 0.0639)  | 0.5438   | 0.9999       |
| MHiBP     | Glutamate                    | 0.0102 (-0.1371, 0.1575)  | 0.8906   | 0.9756        | 0.0171 (-0.1352, 0.1694)   | 0.8238   | 0.9999       |
| MHiBP     | Glutamine                    | 0.0202 (-0.0395, 0.0799)  | 0.5036   | 0.9556        | 0.0202 (-0.0427, 0.0830)   | 0.5260   | 0.9999       |
| MHiBP     | Glycine                      | 0.0208 (-0.0698, 0.1113)  | 0.6503   | 0.9690        | 0.0093 (-0.0853, 0.1039)   | 0.8455   | 0.9999       |
| MHiBP     | Isoleucine                   | -0.0372 (-0.1532, 0.0789) | 0.5266   | 0.9556        | -0.0422 (-0.1627, 0.0783)  | 0.4889   | 0.9999       |
| MHiBP     | Lactate                      | 0.0444 (-0.0579, 0.1467)  | 0.3912   | 0.9389        | 0.0340 (-0.0718, 0.1398)   | 0.5252   | 0.9999       |
| MHiBP     | Leucine                      | -0.0472 (-0.1463, 0.0518) | 0.3464   | 0.9330        | -0.0537 (-0.1554, 0.0480)  | 0.2973   | 0.9999       |
| MHiBP     | Lysine                       | -0.0475 (-0.1477, 0.0526) | 0.3485   | 0.9330        | -0.0493 (-0.1530, 0.0545)  | 0.3483   | 0.9999       |
| MHiBP     | Methanol                     | -0.1559 (-0.3800, 0.0682) | 0.1706   | 0.9330        | -0.2351 (-0.4650, -0.0052) | 0.0451   | 0.9999       |
| MHiBP     | Methionine                   | -0.0332 (-0.1298, 0.0633) | 0.4960   | 0.9556        | -0.0608 (-0.1597, 0.0382)  | 0.2260   | 0.9999       |
| MHiBP     | myo-Inositol                 | 0.0202 (-0.0668, 0.1073)  | 0.6453   | 0.9690        | -0.0033 (-0.0956, 0.0890)  | 0.9435   | 0.9999       |
| MHiBP     | N,N-Dimethylglycine          | -0.0511 (-0.1298, 0.0276) | 0.2005   | 0.9330        | -0.0545 (-0.1377, 0.0288)  | 0.1969   | 0.9999       |
| MHiBP     | O-Acetylcarnitine            | 0.0177 (-0.0686, 0.1040)  | 0.6853   | 0.9701        | 0.0184 (-0.0703, 0.1071)   | 0.6817   | 0.9999       |
| MHiBP     | Ornithine                    | 0.0569 (-0.0699, 0.1836)  | 0.3754   | 0.9330        | 0.0140 (-0.1152, 0.1432)   | 0.8301   | 0.9999       |
| MHiBP     | Phenylalanine                | -0.0435 (-0.1272, 0.0403) | 0.3059   | 0.9330        | -0.0603 (-0.1468, 0.0262)  | 0.1694   | 0.9999       |
| MHiBP     | Proline                      | -0.0117 (-0.1124, 0.0890) | 0.8177   | 0.9701        | -0.0130 (-0.1179, 0.0920)  | 0.8067   | 0.9999       |
| MHiBP     | Pyruvate                     | 0.1475 (-0.0325, 0.3276)  | 0.1072   | 0.9330        | 0.1169 (-0.0676, 0.3014)   | 0.2116   | 0.9999       |
| MHiBP     | Serine                       | 0.0245 (-0.0656, 0.1145)  | 0.5909   | 0.9556        | 0.0096 (-0.0814, 0.1005)   | 0.8346   | 0.9999       |
| MHiBP     | Taurine                      | 0.0426 (-0.1193, 0.2045)  | 0.6028   | 0.9623        | 0.0165 (-0.1458, 0.1788)   | 0.8402   | 0.9999       |
| MHiBP     | Threonine                    | 0.0277 (-0.1142, 0.1696)  | 0.6993   | 0.9701        | 0.0172 (-0.1319, 0.1663)   | 0.8194   | 0.9999       |
| MHiBP     | Tyrosine                     | -0.0164 (-0.1169, 0.0841) | 0.7466   | 0.9701        | -0.0425 (-0.1448, 0.0599)  | 0.4121   | 0.9999       |
| MHiBP     | Urea                         | -0.0598 (-0.1796, 0.0600) | 0.3244   | 0.9330        | -0.1040 (-0.2229, 0.0150)  | 0.0859   | 0.9999       |
| MHiBP     | Valine                       | -0.0449 (-0.1367, 0.0469) | 0.3339   | 0.9330        | -0.0564 (-0.1507, 0.0378)  | 0.2377   | 0.9999       |
| MiBP      | 2-Hydroxybutyrate            | -0.0625 (-0.1958, 0.0708) | 0.3543   | 0.9330        | -0.0484 (-0.1869, 0.0900)  | 0.4893   | 0.9999       |
| MiBP      | 2-Hydroxyisobutyrate         | -0.0623 (-0.1290, 0.0044) | 0.0670   | 0.9330        | -0.0566 (-0.1268, 0.0136)  | 0.1127   | 0.9999       |
| MiBP      | 2-Hydroxyisovalerate         | -0.0457 (-0.1216, 0.0302) | 0.2348   | 0.9330        | -0.0409 (-0.1186, 0.0369)  | 0.2996   | 0.9999       |
| MiBP      | 2-Oxoglutarate               | -0.0545 (-0.1362, 0.0272) | 0.1884   | 0.9330        | -0.0348 (-0.1179, 0.0483)  | 0.4084   | 0.9999       |
| MiBP      | 2-Oxoisocaproate             | -0.0335 (-0.1208, 0.0537) | 0.4474   | 0.9556        | -0.0228 (-0.1139, 0.0683)  | 0.6204   | 0.9999       |
| MiBP      | 3-Hydroxybutyrate            | 0.0131 (-0.2172, 0.2435)  | 0.9101   | 0.9785        | 0.0306 (-0.1982, 0.2594)   | 0.7909   | 0.9999       |
| MiBP      | 3-Hydroxyisobutyrate         | -0.0825 (-0.1965, 0.0315) | 0.1539   | 0.9330        | -0.1078 (-0.2150, -0.0006) | 0.0488   | 0.9999       |
| MiBP      | 3-Hydroxyisovalerate         | -0.0591 (-0.1260, 0.0079) | 0.0831   | 0.9330        | -0.0429 (-0.1105, 0.0247)  | 0.2110   | 0.9999       |
| MiBP      | 3-Methyl-2-oxo-butanoic acid | -0.0500 (-0.1165, 0.0164) | 0.1383   | 0.9330        | -0.0450 (-0.1150, 0.0250)  | 0.2050   | 0.9999       |
| MiBP      | Acetate                      | 0.0334 (-0.0816, 0.1484)  | 0.5656   | 0.9556        | 0.0139 (-0.1033, 0.1310)   | 0.8147   | 0.9999       |
| MiBP      | Acetoacetate                 | -0.0263 (-0.1964, 0.1438) | 0.7597   | 0.9701        | -0.0129 (-0.1864, 0.1607)  | 0.8833   | 0.9999       |
| MiBP      | Acetone                      | 0.0662 (-0.0584, 0.1908)  | 0.2942   | 0.9330        | 0.0680 (-0.0562, 0.1922)   | 0.2797   | 0.9999       |

| Phthalate | Metabolite                   | Total Effect               |        |        | Direct Effect              |        |        |
|-----------|------------------------------|----------------------------|--------|--------|----------------------------|--------|--------|
|           |                              | Estimate (95% CI)          | p      | FDR p  | Estimate (95% CI)          | p      | FDR p  |
| MiBP      | Alanine                      | 0.0055 (-0.0544, 0.0653)   | 0.8570 | 0.9701 | -0.0081 (-0.0691, 0.0530)  | 0.7940 | 0.9999 |
| MiBP      | Arginine                     | -0.0769 (-0.1629, 0.0090)  | 0.0788 | 0.9330 | -0.0680 (-0.1570, 0.0211)  | 0.1329 | 0.9999 |
| MiBP      | Asparagine                   | -0.0004 (-0.0840, 0.0831)  | 0.9923 | 0.9964 | -0.0214 (-0.1035, 0.0607)  | 0.6057 | 0.9999 |
| MiBP      | Aspartate                    | -0.0412 (-0.1657, 0.0833)  | 0.5125 | 0.9556 | -0.0570 (-0.1790, 0.0650)  | 0.3562 | 0.9999 |
| MiBP      | Betaine                      | -0.0240 (-0.0919, 0.0438)  | 0.4836 | 0.9556 | -0.0069 (-0.0790, 0.0652)  | 0.8493 | 0.9999 |
| MiBP      | Carnitine                    | -0.0430 (-0.1123, 0.0264)  | 0.2216 | 0.9330 | -0.0451 (-0.1166, 0.0264)  | 0.2134 | 0.9999 |
| MiBP      | Choline                      | -0.0246 (-0.1023, 0.0531)  | 0.5316 | 0.9556 | -0.0186 (-0.0978, 0.0606)  | 0.6419 | 0.9999 |
| MiBP      | Citrate                      | -0.0365 (-0.1119, 0.0389)  | 0.3389 | 0.9330 | -0.0203 (-0.0949, 0.0543)  | 0.5904 | 0.9999 |
| MiBP      | Creatine                     | -0.0325 (-0.1549, 0.0899)  | 0.5994 | 0.9623 | -0.0425 (-0.1664, 0.0815)  | 0.4979 | 0.9999 |
| MiBP      | Creatinine                   | -0.0107 (-0.0696, 0.0482)  | 0.7195 | 0.9701 | -0.0107 (-0.0713, 0.0500)  | 0.7278 | 0.9999 |
| MiBP      | Cystine                      | -0.0559 (-0.1606, 0.0487)  | 0.2915 | 0.9330 | -0.0442 (-0.1539, 0.0654)  | 0.4253 | 0.9999 |
| MiBP      | Dimethyl sulfone             | -0.0115 (-0.1421, 0.1190)  | 0.8611 | 0.9701 | -0.0526 (-0.1786, 0.0735)  | 0.4101 | 0.9999 |
| MiBP      | Formate                      | -0.0251 (-0.0956, 0.0454)  | 0.4809 | 0.9556 | -0.0449 (-0.1161, 0.0263)  | 0.2140 | 0.9999 |
| MiBP      | Glucose                      | -0.0177 (-0.0917, 0.0562)  | 0.6351 | 0.9677 | -0.0120 (-0.0876, 0.0635)  | 0.7521 | 0.9999 |
| MiBP      | Glutamate                    | 0.0063 (-0.1167, 0.1293)   | 0.9194 | 0.9823 | 0.0064 (-0.1182, 0.1310)   | 0.9187 | 0.9999 |
| MiBP      | Glutamine                    | -0.0122 (-0.0621, 0.0377)  | 0.6288 | 0.9677 | -0.0117 (-0.0631, 0.0398)  | 0.6540 | 0.9999 |
| MiBP      | Glycine                      | 0.0004 (-0.0753, 0.0761)   | 0.9924 | 0.9964 | -0.0066 (-0.0840, 0.0708)  | 0.8667 | 0.9999 |
| MiBP      | Isoleucine                   | -0.0672 (-0.1633, 0.0290)  | 0.1688 | 0.9330 | -0.0735 (-0.1712, 0.0242)  | 0.1387 | 0.9999 |
| MiBP      | Lactate                      | 0.0589 (-0.0260, 0.1438)   | 0.1717 | 0.9330 | 0.0487 (-0.0375, 0.1349)   | 0.2645 | 0.9999 |
| MiBP      | Leucine                      | -0.0699 (-0.1518, 0.0121)  | 0.0937 | 0.9330 | -0.0758 (-0.1581, 0.0064)  | 0.0704 | 0.9999 |
| MiBP      | Lysine                       | -0.0522 (-0.1356, 0.0311)  | 0.2164 | 0.9330 | -0.0535 (-0.1381, 0.0311)  | 0.2122 | 0.9999 |
| MiBP      | Methanol                     | -0.1102 (-0.2979, 0.0775)  | 0.2468 | 0.9330 | -0.1646 (-0.3537, 0.0246)  | 0.0874 | 0.9999 |
| MiBP      | Methionine                   | -0.0489 (-0.1291, 0.0313)  | 0.2288 | 0.9330 | -0.0668 (-0.1473, 0.0136)  | 0.1026 | 0.9999 |
| MiBP      | myo-Inositol                 | 0.0257 (-0.0469, 0.0983)   | 0.4839 | 0.9556 | 0.0094 (-0.0660, 0.0849)   | 0.8045 | 0.9999 |
| MiBP      | N,N-Dimethylglycine          | -0.0472 (-0.1128, 0.0184)  | 0.1563 | 0.9330 | -0.0453 (-0.1134, 0.0228)  | 0.1899 | 0.9999 |
| MiBP      | O-Acetylcarnitine            | -0.0078 (-0.0799, 0.0643)  | 0.8309 | 0.9701 | -0.0085 (-0.0811, 0.0641)  | 0.8175 | 0.9999 |
| MiBP      | Ornithine                    | 0.0122 (-0.0941, 0.1184)   | 0.8206 | 0.9701 | -0.0235 (-0.1291, 0.0821)  | 0.6596 | 0.9999 |
| MiBP      | Phenylalanine                | -0.0601 (-0.1294, 0.0092)  | 0.0884 | 0.9330 | -0.0708 (-0.1408, -0.0008) | 0.0474 | 0.9999 |
| MiBP      | Proline                      | -0.0105 (-0.0946, 0.0736)  | 0.8051 | 0.9701 | -0.0117 (-0.0975, 0.0742)  | 0.7879 | 0.9999 |
| MiBP      | Pyruvate                     | 0.1549 (0.0057, 0.3041)    | 0.0420 | 0.9330 | 0.1229 (-0.0272, 0.2730)   | 0.1073 | 0.9999 |
| MiBP      | Serine                       | -0.0130 (-0.0883, 0.0622)  | 0.7318 | 0.9701 | -0.0261 (-0.1003, 0.0482)  | 0.4874 | 0.9999 |
| MiBP      | Taurine                      | 0.0461 (-0.0890, 0.1812)   | 0.5002 | 0.9556 | 0.0243 (-0.1084, 0.1571)   | 0.7166 | 0.9999 |
| MiBP      | Threonine                    | -0.0347 (-0.1531, 0.0837)  | 0.5625 | 0.9556 | -0.0377 (-0.1594, 0.0840)  | 0.5402 | 0.9999 |
| MiBP      | Tyrosine                     | -0.0360 (-0.1197, 0.0477)  | 0.3950 | 0.9389 | -0.0548 (-0.1381, 0.0285)  | 0.1945 | 0.9999 |
| MiBP      | Urea                         | -0.0621 (-0.1618, 0.0377)  | 0.2202 | 0.9330 | -0.0883 (-0.1855, 0.0089)  | 0.0744 | 0.9999 |
| MiBP      | Valine                       | -0.0636 (-0.1395, 0.0123)  | 0.0997 | 0.9330 | -0.0742 (-0.1504, 0.0020)  | 0.0562 | 0.9999 |
| MNP       | 2-Hydroxybutyrate            | -0.0620 (-0.1793, 0.0552)  | 0.2963 | 0.9330 | -0.0162 (-0.1439, 0.1115)  | 0.8015 | 0.9999 |
| MNP       | 2-Hydroxyisobutyrate         | -0.0402 (-0.0994, 0.0190)  | 0.1810 | 0.9330 | -0.0291 (-0.0943, 0.0360)  | 0.3773 | 0.9999 |
| MNP       | 2-Hydroxyisovalerate         | -0.0282 (-0.0953, 0.0388)  | 0.4054 | 0.9426 | -0.0198 (-0.0916, 0.0521)  | 0.5862 | 0.9999 |
| MNP       | 2-Oxoglutarate               | -0.0383 (-0.1104, 0.0339)  | 0.2952 | 0.9330 | -0.0207 (-0.0973, 0.0560)  | 0.5937 | 0.9999 |
| MNP       | 2-Oxoisocaproate             | -0.0867 (-0.1618, -0.0116) | 0.0242 | 0.9330 | -0.0741 (-0.1566, 0.0085)  | 0.0781 | 0.9999 |
| MNP       | 3-Hydroxybutyrate            | -0.2142 (-0.4124, -0.0160) | 0.0345 | 0.9330 | -0.1291 (-0.3380, 0.0799)  | 0.2232 | 0.9999 |
| MNP       | 3-Hydroxyisobutyrate         | 0.0010 (-0.1004, 0.1025)   | 0.9837 | 0.9964 | 0.0520 (-0.0481, 0.1521)   | 0.3053 | 0.9999 |
| MNP       | 3-Hydroxyisovalerate         | -0.0264 (-0.0860, 0.0333)  | 0.3826 | 0.9350 | -0.0150 (-0.0777, 0.0476)  | 0.6353 | 0.9999 |
| MNP       | 3-Methyl-2-oxo-butanoic acid | -0.0439 (-0.1024, 0.0146)  | 0.1394 | 0.9330 | -0.0379 (-0.1024, 0.0266)  | 0.2466 | 0.9999 |
| MNP       | Acetate                      | 0.0547 (-0.0461, 0.1555)   | 0.2840 | 0.9330 | 0.0280 (-0.0796, 0.1357)   | 0.6063 | 0.9999 |
| MNP       | Acetoacetate                 | -0.1274 (-0.2750, 0.0202)  | 0.0899 | 0.9330 | -0.0940 (-0.2526, 0.0645)  | 0.2421 | 0.9999 |
| MNP       | Acetone                      | 0.0267 (-0.0835, 0.1369)   | 0.6316 | 0.9677 | 0.0656 (-0.0486, 0.1798)   | 0.2573 | 0.9999 |
| MNP       | Alanine                      | 0.0383 (-0.0139, 0.0905)   | 0.1482 | 0.9330 | 0.0360 (-0.0198, 0.0917)   | 0.2033 | 0.9999 |
| MNP       | Arginine                     | -0.0488 (-0.1251, 0.0274)  | 0.2069 | 0.9330 | -0.0426 (-0.1250, 0.0399)  | 0.3079 | 0.9999 |
| MNP       | Asparagine                   | 0.0731 (0.0010, 0.1451)    | 0.0471 | 0.9330 | 0.0626 (-0.0119, 0.1372)   | 0.0988 | 0.9999 |
| MNP       | Aspartate                    | 0.0033 (-0.1065, 0.1132)   | 0.9520 | 0.9901 | 0.0499 (-0.0624, 0.1623)   | 0.3797 | 0.9999 |
| MNP       | Betaine                      | 0.0137 (-0.0461, 0.0736)   | 0.6494 | 0.9690 | 0.0240 (-0.0422, 0.0901)   | 0.4736 | 0.9999 |
| MNP       | Carnitine                    | -0.0296 (-0.0908, 0.0317)  | 0.3402 | 0.9330 | -0.0160 (-0.0822, 0.0502)  | 0.6320 | 0.9999 |
| MNP       | Choline                      | -0.0125 (-0.0810, 0.0560)  | 0.7179 | 0.9701 | 0.0122 (-0.0607, 0.0851)   | 0.7407 | 0.9999 |
| MNP       | Citrate                      | 0.0240 (-0.0426, 0.0905)   | 0.4764 | 0.9556 | 0.0406 (-0.0277, 0.1088)   | 0.2413 | 0.9999 |
| MNP       | Creatine                     | 0.0263 (-0.0815, 0.1341)   | 0.6295 | 0.9677 | 0.0414 (-0.0726, 0.1554)   | 0.4727 | 0.9999 |
| MNP       | Creatinine                   | 0.0567 (0.0060, 0.1073)    | 0.0287 | 0.9330 | 0.0641 (0.0098, 0.1183)    | 0.0212 | 0.9999 |
| MNP       | Cystine                      | -0.0408 (-0.1331, 0.0515)  | 0.3825 | 0.9350 | -0.0449 (-0.1458, 0.0559)  | 0.3788 | 0.9999 |
| MNP       | Dimethyl sulfone             | 0.0885 (-0.0251, 0.2021)   | 0.1254 | 0.9330 | 0.0557 (-0.0602, 0.1716)   | 0.3422 | 0.9999 |

| Phthalate | Metabolite          | Total Effect               |          | Direct Effect |                            |          |              |
|-----------|---------------------|----------------------------|----------|---------------|----------------------------|----------|--------------|
|           |                     | Estimate (95% CI)          | <i>p</i> | FDR <i>p</i>  | Estimate (95% CI)          | <i>p</i> | FDR <i>p</i> |
| MNP       | Formate             | 0.0083 (-0.0540, 0.0705)   | 0.7929   | 0.9701        | 0.0068 (-0.0593, 0.0728)   | 0.8387   | 0.9999       |
| MNP       | Glucose             | 0.0202 (-0.0449, 0.0852)   | 0.5394   | 0.9556        | 0.0118 (-0.0577, 0.0813)   | 0.7361   | 0.9999       |
| MNP       | Glutamate           | -0.0192 (-0.1274, 0.0891)  | 0.7260   | 0.9701        | 0.0090 (-0.1057, 0.1237)   | 0.8767   | 0.9999       |
| MNP       | Glutamine           | -0.0152 (-0.0591, 0.0287)  | 0.4933   | 0.9556        | -0.0199 (-0.0672, 0.0273)  | 0.4042   | 0.9999       |
| MNP       | Glycine             | 0.0527 (-0.0131, 0.1186)   | 0.1149   | 0.9330        | 0.0555 (-0.0148, 0.1258)   | 0.1206   | 0.9999       |
| MNP       | Isoleucine          | -0.0196 (-0.1050, 0.0657)  | 0.6491   | 0.9690        | 0.0004 (-0.0905, 0.0914)   | 0.9926   | 0.9999       |
| MNP       | Lactate             | 0.0674 (-0.0068, 0.1417)   | 0.0747   | 0.9330        | 0.0794 (0.0012, 0.1576)    | 0.0467   | 0.9999       |
| MNP       | Leucine             | -0.0163 (-0.0894, 0.0568)  | 0.6587   | 0.9701        | 0.0082 (-0.0688, 0.0852)   | 0.8333   | 0.9999       |
| MNP       | Lysine              | 0.0177 (-0.0561, 0.0916)   | 0.6349   | 0.9677        | 0.0502 (-0.0276, 0.1280)   | 0.2031   | 0.9999       |
| MNP       | Methanol            | -0.0308 (-0.1971, 0.1354)  | 0.7135   | 0.9701        | -0.0203 (-0.1970, 0.1564)  | 0.8199   | 0.9999       |
| MNP       | Methionine          | 0.0819 (0.0127, 0.1511)    | 0.0208   | 0.9330        | 0.0938 (0.0211, 0.1664)    | 0.0120   | 0.9999       |
| MNP       | myo-Inositol        | 0.0520 (-0.0112, 0.1152)   | 0.1055   | 0.9330        | 0.0670 (-0.0011, 0.1351)   | 0.0538   | 0.9999       |
| MNP       | N,N-Dimethylglycine | 0.0077 (-0.0506, 0.0661)   | 0.7926   | 0.9701        | 0.0203 (-0.0428, 0.0834)   | 0.5240   | 0.9999       |
| MNP       | O-Acetylcarnitine   | -0.1000 (-0.1603, -0.0398) | 0.0014   | 0.9228        | -0.0684 (-0.1337, -0.0030) | 0.0406   | 0.9999       |
| MNP       | Ornithine           | 0.0630 (-0.0297, 0.1557)   | 0.1804   | 0.9330        | 0.0845 (-0.0112, 0.1803)   | 0.0828   | 0.9999       |
| MNP       | Phenylalanine       | 0.0355 (-0.0260, 0.0971)   | 0.2544   | 0.9330        | 0.0502 (-0.0147, 0.1152)   | 0.1282   | 0.9999       |
| MNP       | Proline             | 0.0472 (-0.0262, 0.1206)   | 0.2052   | 0.9330        | 0.0610 (-0.0171, 0.1390)   | 0.1242   | 0.9999       |
| MNP       | Pyruvate            | 0.0602 (-0.0735, 0.1938)   | 0.3739   | 0.9330        | 0.0253 (-0.1146, 0.1653)   | 0.7200   | 0.9999       |
| MNP       | Serine              | 0.0315 (-0.0345, 0.0975)   | 0.3458   | 0.9330        | 0.0457 (-0.0221, 0.1136)   | 0.1841   | 0.9999       |
| MNP       | Taurine             | 0.0658 (-0.0526, 0.1843)   | 0.2729   | 0.9330        | 0.1186 (-0.0012, 0.2384)   | 0.0524   | 0.9999       |
| MNP       | Threonine           | 0.0487 (-0.0553, 0.1526)   | 0.3553   | 0.9330        | 0.0442 (-0.0677, 0.1561)   | 0.4347   | 0.9999       |
| MNP       | Tyrosine            | 0.0817 (0.0096, 0.1538)    | 0.0268   | 0.9330        | 0.0852 (0.0098, 0.1606)    | 0.0271   | 0.9999       |
| MNP       | Urea                | 0.0066 (-0.0819, 0.0951)   | 0.8824   | 0.9737        | 0.0108 (-0.0801, 0.1017)   | 0.8143   | 0.9999       |
| MNP       | Valine              | 0.0071 (-0.0607, 0.0749)   | 0.8360   | 0.9701        | 0.0264 (-0.0449, 0.0977)   | 0.4637   | 0.9999       |

**Table S3:** Estimates of the total and direct effects of a one quartile increase of each phthalate metabolite in the mixture on each serum metabolite. The estimate and 95% confidence interval (CI) for each serum metabolite were bootstrapped independently using quantile g-computation models. The total effect was adjusted for birth year, fasted time, gestational age at sample collection, homeownership, maternal education, and maternal race/ethnicity. The direct effect models were adjusted for birth year, birth year, fasted time, gestational age at sample collection, homeownership, maternal metabolic condition, and maternal race/ethnicity. All *p*-values were adjusted for false discovery rate (FDR) and both the original and FDR *p*-values are reported.

| Metabolite                   | Total Effect              |          |              | Direct Effect              |          |              |
|------------------------------|---------------------------|----------|--------------|----------------------------|----------|--------------|
|                              | Estimate (95% CI)         | <i>p</i> | FDR <i>p</i> | Estimate (95% CI)          | <i>p</i> | FDR <i>p</i> |
| 2-Hydroxybutyrate            | -0.0184 (-0.0833, 0.0465) | 0.5792   | 0.9613       | -0.0108 (-0.0746, 0.0531)  | 0.7414   | 0.9692       |
| 2-Hydroxyisobutyrate         | -0.0173 (-0.0452, 0.0105) | 0.2253   | 0.8688       | -0.0192 (-0.0473, 0.0089)  | 0.1838   | 0.9692       |
| 2-Hydroxyisovalerate         | -0.0008 (-0.0362, 0.0347) | 0.9665   | 0.9790       | -0.0022 (-0.0417, 0.0372)  | 0.9125   | 0.9692       |
| 2-Oxoglutarate               | -0.0005 (-0.0394, 0.0383) | 0.9790   | 0.9790       | 0.0048 (-0.0346, 0.0442)   | 0.8118   | 0.9692       |
| 2-Oxoisocaproate             | -0.0256 (-0.0692, 0.0180) | 0.2537   | 0.8688       | -0.0230 (-0.0672, 0.0212)  | 0.3106   | 0.9692       |
| 3-Hydroxybutyrate            | -0.0547 (-0.1673, 0.0580) | 0.3444   | 0.8701       | -0.0469 (-0.1564, 0.0627)  | 0.4041   | 0.9692       |
| 3-Hydroxyisobutyrate         | -0.0142 (-0.0673, 0.0390) | 0.6030   | 0.9613       | -0.0135 (-0.0639, 0.0369)  | 0.6015   | 0.9692       |
| 3-Hydroxyisovalerate         | -0.0154 (-0.0460, 0.0151) | 0.3258   | 0.8688       | -0.0125 (-0.0461, 0.0210)  | 0.4669   | 0.9692       |
| 3-Methyl-2-oxo-butanoic acid | -0.0228 (-0.0509, 0.0054) | 0.1170   | 0.8688       | -0.0225 (-0.0536, 0.0085)  | 0.1591   | 0.9692       |
| Acetate                      | -0.0047 (-0.0612, 0.0518) | 0.8712   | 0.9790       | -0.0054 (-0.0650, 0.0543)  | 0.8606   | 0.9692       |
| Acetoacetate                 | -0.0507 (-0.1420, 0.0406) | 0.2793   | 0.8688       | -0.0469 (-0.1389, 0.0451)  | 0.3203   | 0.9692       |
| Acetone                      | 0.0134 (-0.0454, 0.0722)  | 0.6566   | 0.9613       | 0.0166 (-0.0451, 0.0783)   | 0.6000   | 0.9692       |
| Alanine                      | 0.0210 (-0.0080, 0.0499)  | 0.1603   | 0.8688       | 0.0219 (-0.0093, 0.0531)   | 0.1721   | 0.9692       |
| Arginine                     | -0.0158 (-0.0540, 0.0223) | 0.4189   | 0.9091       | -0.0184 (-0.0606, 0.0237)  | 0.3941   | 0.9692       |
| Asparagine                   | 0.0230 (-0.0157, 0.0617)  | 0.2478   | 0.8688       | 0.0184 (-0.0221, 0.0589)   | 0.3749   | 0.9692       |
| Aspartate                    | -0.0030 (-0.0643, 0.0584) | 0.9250   | 0.9790       | -0.0047 (-0.0677, 0.0583)  | 0.8848   | 0.9692       |
| Betaine                      | 0.0018 (-0.0337, 0.0372)  | 0.9214   | 0.9790       | 0.0027 (-0.0341, 0.0395)   | 0.8849   | 0.9692       |
| Carnitine                    | -0.0080 (-0.0437, 0.0277) | 0.6609   | 0.9613       | -0.0034 (-0.0394, 0.0326)  | 0.8539   | 0.9692       |
| Choline                      | 0.0096 (-0.0289, 0.0481)  | 0.6271   | 0.9613       | 0.0112 (-0.0316, 0.0540)   | 0.6102   | 0.9692       |
| Citrate                      | -0.0020 (-0.0357, 0.0317) | 0.9076   | 0.9790       | 0.0011 (-0.0346, 0.0367)   | 0.9539   | 0.9692       |
| Creatine                     | 0.0123 (-0.0507, 0.0753)  | 0.7031   | 0.9790       | 0.0073 (-0.0555, 0.0700)   | 0.8213   | 0.9692       |
| Creatinine                   | 0.0101 (-0.0169, 0.0371)  | 0.4645   | 0.9290       | 0.0116 (-0.0172, 0.0405)   | 0.4323   | 0.9692       |
| Cystine                      | -0.0224 (-0.0716, 0.0267) | 0.3730   | 0.8919       | -0.0188 (-0.0690, 0.0314)  | 0.4640   | 0.9692       |
| Dimethyl sulfone             | 0.0236 (-0.0355, 0.0828)  | 0.4356   | 0.9091       | 0.0019 (-0.0549, 0.0587)   | 0.9477   | 0.9692       |
| Formate                      | -0.0122 (-0.0510, 0.0266) | 0.5393   | 0.9613       | -0.0136 (-0.0536, 0.0265)  | 0.5093   | 0.9692       |
| Glucose                      | -0.0288 (-0.0643, 0.0068) | 0.1166   | 0.8688       | -0.0245 (-0.0598, 0.0109)  | 0.1784   | 0.9692       |
| Glutamate                    | 0.0025 (-0.0527, 0.0578)  | 0.9282   | 0.9790       | 0.0059 (-0.0536, 0.0653)   | 0.8472   | 0.9692       |
| Glutamine                    | -0.0035 (-0.0290, 0.0220) | 0.7904   | 0.9790       | -0.0035 (-0.0311, 0.0241)  | 0.8029   | 0.9692       |
| Glycine                      | 0.0196 (-0.0178, 0.0570)  | 0.3076   | 0.8688       | 0.0183 (-0.0207, 0.0572)   | 0.3612   | 0.9692       |
| Isoleucine                   | 0.0010 (-0.0466, 0.0486)  | 0.9668   | 0.9790       | 0.0019 (-0.0504, 0.0542)   | 0.9438   | 0.9692       |
| Lactate                      | 0.0344 (-0.0069, 0.0758)  | 0.1065   | 0.8688       | 0.0372 (-0.0043, 0.0788)   | 0.0829   | 0.9692       |
| Leucine                      | -0.0039 (-0.0446, 0.0368) | 0.8530   | 0.9790       | -0.0039 (-0.0466, 0.0389)  | 0.8595   | 0.9692       |
| Lysine                       | 0.0048 (-0.0419, 0.0515)  | 0.8414   | 0.9790       | 0.0053 (-0.0443, 0.0548)   | 0.8349   | 0.9692       |
| Methanol                     | -0.1060 (-0.2141, 0.0021) | 0.0580   | 0.8688       | -0.1077 (-0.2145, -0.0008) | 0.0516   | 0.9692       |
| Methionine                   | 0.0213 (-0.0198, 0.0624)  | 0.3127   | 0.8688       | 0.0171 (-0.0242, 0.0584)   | 0.4188   | 0.9692       |
| myo-Inositol                 | -0.0162 (-0.0528, 0.0205) | 0.3902   | 0.8919       | -0.0179 (-0.0536, 0.0178)  | 0.3295   | 0.9692       |
| N,N-Dimethylglycine          | -0.0089 (-0.0396, 0.0218) | 0.5722   | 0.9613       | -0.0086 (-0.0397, 0.0224)  | 0.5871   | 0.9692       |
| O-Acetylcarnitine            | -0.0178 (-0.0512, 0.0157) | 0.3008   | 0.8688       | -0.0175 (-0.0493, 0.0143)  | 0.2846   | 0.9692       |
| Ornithine                    | 0.0296 (-0.0167, 0.0760)  | 0.2140   | 0.8688       | 0.0299 (-0.0166, 0.0764)   | 0.2112   | 0.9692       |
| Phenylalanine                | 0.0092 (-0.0252, 0.0437)  | 0.6007   | 0.9613       | 0.0065 (-0.0284, 0.0415)   | 0.7148   | 0.9692       |
| Proline                      | 0.0312 (-0.0099, 0.0722)  | 0.1402   | 0.8688       | 0.0310 (-0.0120, 0.0741)   | 0.1617   | 0.9692       |
| Pyruvate                     | 0.0583 (-0.0161, 0.1328)  | 0.1285   | 0.8688       | 0.0620 (-0.0067, 0.1307)   | 0.0808   | 0.9692       |
| Serine                       | 0.0112 (-0.0213, 0.0438)  | 0.5005   | 0.9610       | 0.0096 (-0.0253, 0.0445)   | 0.5917   | 0.9692       |
| Taurine                      | 0.0420 (-0.0229, 0.1070)  | 0.2084   | 0.8688       | 0.0393 (-0.0246, 0.1033)   | 0.2312   | 0.9692       |
| Threonine                    | 0.0085 (-0.0508, 0.0678)  | 0.7798   | 0.9790       | 0.0038 (-0.0581, 0.0658)   | 0.9040   | 0.9692       |
| Tyrosine                     | 0.0211 (-0.0192, 0.0614)  | 0.3079   | 0.8688       | 0.0185 (-0.0233, 0.0603)   | 0.3887   | 0.9692       |
| Urea                         | 0.0062 (-0.0427, 0.0551)  | 0.8037   | 0.9790       | -0.0028 (-0.0485, 0.0430)  | 0.9054   | 0.9692       |
| Valine                       | 0.0010 (-0.0368, 0.0387)  | 0.9604   | 0.9790       | 0.0008 (-0.0376, 0.0391)   | 0.9692   | 0.9692       |

**Table S4:** Permutational multivariate analysis of variance (PERMANOVA) to assess the association between the serum metabolome and neurodevelopmental outcome stratified by child of interest's sex. Serum metabolites were log<sub>10</sub>-transformed. The marginal effects of terms were tested under 9999 permutations.

|                                           | All Children |      |                |        | Females |      |                |        | Males |      |                |        |
|-------------------------------------------|--------------|------|----------------|--------|---------|------|----------------|--------|-------|------|----------------|--------|
| Term                                      | df           | F    | R <sup>2</sup> | p      | df      | F    | R <sup>2</sup> | p      | df    | F    | R <sup>2</sup> | p      |
| Fasted time, minutes                      | 1            | 2.22 | 0.0200         | 0.0217 | 1       | 2.25 | 0.0446         | 0.0236 | 1     | 2.05 | 0.0342         | 0.0273 |
| Gestational age at serum collection, days | 1            | 2.09 | 0.0189         | 0.0306 | 1       | 1.80 | 0.0357         | 0.0724 | 1     | 1.30 | 0.0217         | 0.1980 |
| Birth year                                | 1            | 1.91 | 0.0172         | 0.0490 | 1       | 3.62 | 0.0716         | 0.0016 | 1     | 0.69 | 0.0116         | 0.7554 |
| Homeownership                             | 1            | 1.20 | 0.0108         | 0.2577 | 1       | 1.77 | 0.0350         | 0.0752 | 1     | 0.59 | 0.0099         | 0.8642 |
| Maternal race/ethnicity                   | 1            | 1.24 | 0.0112         | 0.2330 | 1       | 1.08 | 0.0213         | 0.3392 | 1     | 0.60 | 0.0100         | 0.8574 |
| Maternal metabolic condition              | 4            | 1.58 | 0.0569         | 0.0212 | 4       | 1.32 | 0.1044         | 0.1069 | 4     | 1.17 | 0.0780         | 0.2131 |
| Neurodevelopmental Outcome                | 2            | 0.80 | 0.0144         | 0.7125 | 2       | 0.85 | 0.0337         | 0.6273 | 2     | 0.77 | 0.0257         | 0.7662 |
| Residual                                  | 94           |      | 0.8492         |        | 34      |      | 0.6727         |        | 48    |      | 0.8023         |        |
| Total                                     | 105          |      | 1.0000         |        | 45      |      | 1.0000         |        | 59    |      | 1.0000         |        |



**Table S5:** Associations between serum metabolites and neurodevelopmental outcomes. Single-response PERMANOVA was used to assess the association between each log<sub>10</sub>-transformed serum metabolite concentration and neurodevelopmental outcome after adjustment for fasted time, gestational age at serum collection, birth year, homeownership status, maternal metabolic condition, and maternal race/ethnicity. Significance was assessed using permutation testing under 4999 permutations and *p*-values were corrected for false discovery rate (FDR).

| Metabolite                   | F    | R <sup>2</sup> | <i>p</i> | FDR <i>p</i> |
|------------------------------|------|----------------|----------|--------------|
| 2-Hydroxybutyrate            | 1.81 | 0.0295         | 0.1675   | 0.9168       |
| 2-Hydroxyisobutyrate         | 1.22 | 0.0223         | 0.2865   | 0.9168       |
| 2-Hydroxyisovalerate         | 1.69 | 0.0322         | 0.2030   | 0.9168       |
| 2-Oxoglutarate               | 0.08 | 0.0013         | 0.9300   | 0.9935       |
| 2-Oxoisocaproate             | 1.93 | 0.0337         | 0.1625   | 0.9168       |
| 3-Hydroxybutyrate            | 1.55 | 0.0286         | 0.2225   | 0.9168       |
| 3-Hydroxyisobutyrate         | 0.87 | 0.0146         | 0.4200   | 0.9600       |
| 3-Hydroxyisovalerate         | 1.36 | 0.0251         | 0.2605   | 0.9168       |
| 3-Methyl-2-oxo-butanoic acid | 0.95 | 0.0173         | 0.3890   | 0.9516       |
| Acetate                      | 1.98 | 0.0359         | 0.1480   | 0.9168       |
| Acetoacetate                 | 0.01 | 0.0002         | 0.9875   | 0.9935       |
| Acetone                      | 0.13 | 0.0025         | 0.8690   | 0.9935       |
| Alanine                      | 1.83 | 0.0334         | 0.1735   | 0.9168       |
| Arginine                     | 0.50 | 0.0094         | 0.6135   | 0.9935       |
| Asparagine                   | 0.62 | 0.0112         | 0.5565   | 0.9935       |
| Aspartate                    | 0.39 | 0.0063         | 0.6745   | 0.9935       |
| Betaine                      | 1.03 | 0.0184         | 0.3665   | 0.9516       |
| Carnitine                    | 3.07 | 0.0553         | 0.0390   | 0.9168       |
| Choline                      | 0.29 | 0.0044         | 0.7540   | 0.9935       |
| Citrate                      | 1.45 | 0.0227         | 0.2465   | 0.9168       |
| Creatine                     | 1.30 | 0.0250         | 0.2850   | 0.9168       |
| Creatinine                   | 1.05 | 0.0185         | 0.3670   | 0.9516       |
| Cystine                      | 3.22 | 0.0567         | 0.0380   | 0.9168       |
| Dimethyl sulfone             | 0.02 | 0.0004         | 0.9815   | 0.9935       |
| Formate                      | 0.08 | 0.0016         | 0.9205   | 0.9935       |
| Glucose                      | 0.17 | 0.0029         | 0.8390   | 0.9935       |
| Glutamate                    | 0.52 | 0.0096         | 0.5990   | 0.9935       |
| Glutamine                    | 2.28 | 0.0448         | 0.1070   | 0.9168       |
| Glycine                      | 0.72 | 0.0138         | 0.5015   | 0.9935       |
| Isoleucine                   | 0.02 | 0.0004         | 0.9785   | 0.9935       |
| Lactate                      | 1.71 | 0.0281         | 0.1865   | 0.9168       |
| Leucine                      | 0.10 | 0.0019         | 0.8945   | 0.9935       |
| Lysine                       | 0.31 | 0.0059         | 0.7295   | 0.9935       |
| Methanol                     | 0.04 | 0.0007         | 0.9660   | 0.9935       |
| Methionine                   | 0.38 | 0.0072         | 0.6865   | 0.9935       |
| myo-Inositol                 | 0.15 | 0.0025         | 0.8645   | 0.9935       |
| N,N-Dimethylglycine          | 1.03 | 0.0175         | 0.3740   | 0.9516       |
| O-Acetylcarnitine            | 2.20 | 0.0359         | 0.1225   | 0.9168       |
| Ornithine                    | 0.15 | 0.0027         | 0.8545   | 0.9935       |
| Phenylalanine                | 0.15 | 0.0027         | 0.8550   | 0.9935       |
| Proline                      | 0.01 | 0.0001         | 0.9935   | 0.9935       |
| Pyruvate                     | 0.51 | 0.0086         | 0.6055   | 0.9935       |
| Serine                       | 0.61 | 0.0108         | 0.5600   | 0.9935       |
| Taurine                      | 0.43 | 0.0070         | 0.6625   | 0.9935       |
| Threonine                    | 0.78 | 0.0153         | 0.4480   | 0.9775       |
| Tyrosine                     | 0.94 | 0.0174         | 0.3965   | 0.9516       |
| Urea                         | 0.54 | 0.0096         | 0.5925   | 0.9935       |
| Valine                       | 0.17 | 0.0032         | 0.8525   | 0.9935       |

**Table S6:** Estimates of the total and direct effects of each phthalate metabolite on each placental metabolite. The estimated effect of each phthalate metabolite on each placenta metabolite was modeled using multiple linear regression and the estimated coefficients and 95% confidence intervals (CI) are reported. The total effect was adjusted for birth year, maternal education, maternal race/ethnicity, and homeownership status. The direct effect models were adjusted for birth year, maternal education, maternal race/ethnicity, homeownership status, maternal metabolic condition, delivery mode, and gestational age at delivery. All *p*-values were adjusted for false discovery rate (FDR) and both the original and FDR *p*-values are reported.

| Phthalate | Metabolite                  | Total Effect              |        |        | Direct Effect             |        |        |
|-----------|-----------------------------|---------------------------|--------|--------|---------------------------|--------|--------|
|           |                             | Estimate (95% CI)         | p      | FDR p  | Estimate (95% CI)         | p      | FDR p  |
| MBP       | 1,3-Dihydroxyacetone        | -0.1729 (-0.4262, 0.0803) | 0.1789 | 0.9986 | -0.1804 (-0.4423, 0.0814) | 0.1750 | 0.9993 |
| MBP       | 2-Hydroxybutyrate           | -0.0509 (-0.1762, 0.0744) | 0.4229 | 0.9986 | -0.0541 (-0.1829, 0.0746) | 0.4067 | 0.9993 |
| MBP       | 3-Hydroxybutyrate           | 0.1611 (-0.1205, 0.4426)  | 0.2597 | 0.9986 | 0.1358 (-0.1493, 0.4210)  | 0.3475 | 0.9993 |
| MBP       | 4-Aminobutyrate             | -0.0341 (-0.1924, 0.1242) | 0.6708 | 0.9986 | 0.0057 (-0.1505, 0.1618)  | 0.9428 | 0.9993 |
| MBP       | 4-Hydroxybutyrate           | 0.1234 (-0.2365, 0.4833)  | 0.4987 | 0.9986 | 0.1098 (-0.2630, 0.4826)  | 0.5608 | 0.9993 |
| MBP       | Acetate                     | -0.0286 (-0.2488, 0.1915) | 0.7974 | 0.9986 | -0.0102 (-0.2365, 0.2161) | 0.9292 | 0.9993 |
| MBP       | Alanine                     | -0.0360 (-0.1350, 0.0631) | 0.4738 | 0.9986 | -0.0172 (-0.1169, 0.0825) | 0.7335 | 0.9993 |
| MBP       | Arginine                    | -0.0250 (-0.1574, 0.1074) | 0.7093 | 0.9986 | -0.0228 (-0.1590, 0.1134) | 0.7407 | 0.9993 |
| MBP       | Asparagine                  | -0.0260 (-0.1417, 0.0897) | 0.6574 | 0.9986 | -0.0173 (-0.1337, 0.0992) | 0.7696 | 0.9993 |
| MBP       | Aspartate                   | -0.0353 (-0.1367, 0.0661) | 0.4920 | 0.9986 | -0.0431 (-0.1467, 0.0606) | 0.4121 | 0.9993 |
| MBP       | Betaine                     | -0.0738 (-0.1883, 0.0407) | 0.2043 | 0.9986 | -0.0681 (-0.1854, 0.0492) | 0.2527 | 0.9993 |
| MBP       | Carnitine                   | -0.0326 (-0.1329, 0.0677) | 0.5212 | 0.9986 | -0.0237 (-0.1272, 0.0798) | 0.6513 | 0.9993 |
| MBP       | Choline                     | -0.0275 (-0.1351, 0.0800) | 0.6132 | 0.9986 | -0.0223 (-0.1332, 0.0885) | 0.6907 | 0.9993 |
| MBP       | Creatine                    | -0.0323 (-0.1179, 0.0532) | 0.4556 | 0.9986 | -0.0257 (-0.1115, 0.0600) | 0.5537 | 0.9993 |
| MBP       | Cystine                     | 0.0259 (-0.1899, 0.2417)  | 0.8126 | 0.9986 | 0.0267 (-0.1964, 0.2497)  | 0.8133 | 0.9993 |
| MBP       | Ethanolamine                | -0.0421 (-0.1540, 0.0697) | 0.4573 | 0.9986 | -0.0307 (-0.1453, 0.0839) | 0.5970 | 0.9993 |
| MBP       | Formate                     | -0.0774 (-0.2015, 0.0467) | 0.2196 | 0.9986 | -0.0623 (-0.1873, 0.0626) | 0.3255 | 0.9993 |
| MBP       | Fumarate                    | -0.0770 (-0.2349, 0.0809) | 0.3365 | 0.9986 | -0.0880 (-0.2508, 0.0747) | 0.2864 | 0.9993 |
| MBP       | Glucitol                    | -0.0764 (-0.2017, 0.0489) | 0.2297 | 0.9986 | -0.0701 (-0.1987, 0.0585) | 0.2824 | 0.9993 |
| MBP       | Glutamate                   | -0.0096 (-0.1036, 0.0845) | 0.8408 | 0.9986 | -0.0039 (-0.0998, 0.0921) | 0.9364 | 0.9993 |
| MBP       | Glutamine                   | -0.0278 (-0.0923, 0.0367) | 0.3956 | 0.9986 | -0.0228 (-0.0867, 0.0411) | 0.4813 | 0.9993 |
| MBP       | Glutathione                 | -0.0747 (-0.3161, 0.1667) | 0.5414 | 0.9986 | -0.0652 (-0.3102, 0.1798) | 0.5995 | 0.9993 |
| MBP       | Glycerol                    | -0.0195 (-0.1440, 0.1049) | 0.7566 | 0.9986 | -0.0139 (-0.1421, 0.1143) | 0.8305 | 0.9993 |
| MBP       | Glycine                     | -0.0178 (-0.1199, 0.0843) | 0.7305 | 0.9986 | -0.0090 (-0.1131, 0.0951) | 0.8647 | 0.9993 |
| MBP       | Hypoxanthine                | -0.0350 (-0.1308, 0.0608) | 0.4707 | 0.9986 | -0.0211 (-0.1184, 0.0762) | 0.6681 | 0.9993 |
| MBP       | Inosine                     | -0.0115 (-0.2359, 0.2130) | 0.9196 | 0.9986 | -0.0296 (-0.2554, 0.1961) | 0.7953 | 0.9993 |
| MBP       | Isoleucine                  | -0.0083 (-0.1207, 0.1042) | 0.8845 | 0.9986 | 0.0044 (-0.1094, 0.1182)  | 0.9392 | 0.9993 |
| MBP       | Kynurenine                  | -0.0372 (-0.2102, 0.1359) | 0.6716 | 0.9986 | -0.0303 (-0.2076, 0.1470) | 0.7356 | 0.9993 |
| MBP       | Lactate                     | 0.0230 (-0.0498, 0.0958)  | 0.5333 | 0.9986 | 0.0339 (-0.0406, 0.1084)  | 0.3698 | 0.9993 |
| MBP       | Leucine                     | -0.0101 (-0.1266, 0.1064) | 0.8641 | 0.9986 | 0.0040 (-0.1136, 0.1216)  | 0.9466 | 0.9993 |
| MBP       | Lysine                      | -0.0439 (-0.1757, 0.0880) | 0.5117 | 0.9986 | -0.0331 (-0.1665, 0.1003) | 0.6241 | 0.9993 |
| MBP       | Methionine                  | 0.0054 (-0.1182, 0.1290)  | 0.9314 | 0.9986 | 0.0173 (-0.1067, 0.1413)  | 0.7830 | 0.9993 |
| MBP       | myo-Inositol                | 0.0430 (-0.0682, 0.1541)  | 0.4458 | 0.9986 | 0.0291 (-0.0840, 0.1421)  | 0.6114 | 0.9993 |
| MBP       | N-Acetylneuraminate         | -0.0749 (-0.2097, 0.0598) | 0.2733 | 0.9986 | -0.0747 (-0.2134, 0.0641) | 0.2887 | 0.9993 |
| MBP       | NAD+                        | -0.0280 (-0.2838, 0.2278) | 0.8287 | 0.9986 | -0.0151 (-0.2770, 0.2469) | 0.9095 | 0.9993 |
| MBP       | Niacinamide                 | 0.0988 (-0.3800, 0.5776)  | 0.6838 | 0.9986 | 0.0720 (-0.4165, 0.5606)  | 0.7709 | 0.9993 |
| MBP       | O-Acetylcarnitine           | 0.0028 (-0.1155, 0.1210)  | 0.9628 | 0.9986 | 0.0082 (-0.1137, 0.1302)  | 0.8938 | 0.9993 |
| MBP       | O-Phosphocholine            | -0.0410 (-0.3479, 0.2659) | 0.7919 | 0.9986 | -0.0154 (-0.3326, 0.3017) | 0.9234 | 0.9993 |
| MBP       | O-Phosphoethanolamine       | 0.0433 (-0.1768, 0.2633)  | 0.6978 | 0.9986 | 0.0355 (-0.1878, 0.2588)  | 0.7535 | 0.9993 |
| MBP       | Ornithine                   | -0.0274 (-0.1984, 0.1437) | 0.7521 | 0.9986 | -0.0226 (-0.1974, 0.1522) | 0.7987 | 0.9993 |
| MBP       | Pantothenate                | -0.0647 (-0.2168, 0.0873) | 0.4010 | 0.9986 | -0.0616 (-0.2161, 0.0930) | 0.4318 | 0.9993 |
| MBP       | Phenylalanine               | -0.0109 (-0.1290, 0.1072) | 0.8552 | 0.9986 | 0.0005 (-0.1190, 0.1200)  | 0.9937 | 0.9998 |
| MBP       | Proline                     | -0.0083 (-0.1095, 0.0929) | 0.8711 | 0.9986 | 0.0035 (-0.0996, 0.1065)  | 0.9472 | 0.9993 |
| MBP       | Pyroglutamate               | -0.1001 (-0.2389, 0.0386) | 0.1556 | 0.9986 | -0.1002 (-0.2436, 0.0432) | 0.1689 | 0.9993 |
| MBP       | Serine                      | -0.0276 (-0.1479, 0.0926) | 0.6501 | 0.9986 | -0.0184 (-0.1397, 0.1028) | 0.7638 | 0.9993 |
| MBP       | sn-Glycero-3-phosphocholine | -0.0864 (-0.2736, 0.1008) | 0.3628 | 0.9986 | -0.0589 (-0.2439, 0.1261) | 0.5299 | 0.9993 |
| MBP       | Succinate                   | 0.0382 (-0.1738, 0.2503)  | 0.7218 | 0.9986 | 0.0637 (-0.1531, 0.2805)  | 0.5617 | 0.9993 |
| MBP       | Taurine                     | -0.0187 (-0.1093, 0.0718) | 0.6829 | 0.9986 | -0.0090 (-0.1018, 0.0838) | 0.8486 | 0.9993 |
| MBP       | Threonine                   | -0.0204 (-0.1296, 0.0889) | 0.7126 | 0.9986 | -0.0120 (-0.1214, 0.0973) | 0.8280 | 0.9993 |

| Phthalate | Metabolite                  | Total Effect               |        |        | Direct Effect              |        |        |
|-----------|-----------------------------|----------------------------|--------|--------|----------------------------|--------|--------|
|           |                             | Estimate (95% CI)          | p      | FDR p  | Estimate (95% CI)          | p      | FDR p  |
| MBP       | Tryptophan                  | 0.1301 (-0.0589, 0.3190)   | 0.1756 | 0.9986 | 0.1440 (-0.0475, 0.3354)   | 0.1392 | 0.9993 |
| MBP       | Tyrosine                    | -0.0120 (-0.1227, 0.0988)  | 0.8309 | 0.9986 | -0.0019 (-0.1138, 0.1100)  | 0.9730 | 0.9993 |
| MBP       | Uracil                      | 0.0033 (-0.1543, 0.1608)   | 0.9675 | 0.9986 | 0.0092 (-0.1523, 0.1707)   | 0.9106 | 0.9993 |
| MBP       | Uridine                     | -0.0821 (-0.2854, 0.1212)  | 0.4257 | 0.9986 | -0.0905 (-0.2986, 0.1175)  | 0.3908 | 0.9993 |
| MBP       | Valine                      | -0.0145 (-0.1185, 0.0895)  | 0.7834 | 0.9986 | -0.0030 (-0.1080, 0.1021)  | 0.9556 | 0.9993 |
| MBzP      | 1,3-Dihydroxyacetone        | -0.0190 (-0.1934, 0.1553)  | 0.8295 | 0.9986 | -0.0188 (-0.2012, 0.1637)  | 0.8388 | 0.9993 |
| MBzP      | 2-Hydroxybutyrate           | -0.0986 (-0.1827, -0.0145) | 0.0220 | 0.9986 | -0.1046 (-0.1919, -0.0174) | 0.0192 | 0.9993 |
| MBzP      | 3-Hydroxybutyrate           | -0.0889 (-0.2817, 0.1040)  | 0.3636 | 0.9986 | -0.1286 (-0.3252, 0.0680)  | 0.1977 | 0.9993 |
| MBzP      | 4-Aminobutyrate             | 0.0509 (-0.0570, 0.1589)   | 0.3523 | 0.9986 | 0.0919 (-0.0148, 0.1986)   | 0.0907 | 0.9993 |
| MBzP      | 4-Hydroxybutyrate           | 0.1808 (-0.0637, 0.4252)   | 0.1458 | 0.9986 | 0.1698 (-0.0865, 0.4262)   | 0.1921 | 0.9993 |
| MBzP      | Acetate                     | -0.0302 (-0.1807, 0.1202)  | 0.6917 | 0.9986 | -0.0190 (-0.1755, 0.1375)  | 0.8104 | 0.9993 |
| MBzP      | Alanine                     | -0.0024 (-0.0702, 0.0655)  | 0.9450 | 0.9986 | 0.0135 (-0.0555, 0.0824)   | 0.6994 | 0.9993 |
| MBzP      | Arginine                    | -0.0079 (-0.0985, 0.0827)  | 0.8633 | 0.9986 | -0.0045 (-0.0988, 0.0897)  | 0.9247 | 0.9993 |
| MBzP      | Asparagine                  | 0.0059 (-0.0733, 0.0851)   | 0.8835 | 0.9986 | 0.0108 (-0.0698, 0.0913)   | 0.7919 | 0.9993 |
| MBzP      | Aspartate                   | -0.0161 (-0.0854, 0.0533)  | 0.6476 | 0.9986 | -0.0278 (-0.0995, 0.0439)  | 0.4444 | 0.9993 |
| MBzP      | Betaine                     | -0.0359 (-0.1144, 0.0427)  | 0.3677 | 0.9986 | -0.0412 (-0.1225, 0.0400)  | 0.3168 | 0.9993 |
| MBzP      | Carnitine                   | -0.0328 (-0.1012, 0.0357)  | 0.3450 | 0.9986 | -0.0286 (-0.1001, 0.0428)  | 0.4292 | 0.9993 |
| MBzP      | Choline                     | 0.0222 (-0.0513, 0.0957)   | 0.5510 | 0.9986 | 0.0307 (-0.0459, 0.1072)   | 0.4292 | 0.9993 |
| MBzP      | Creatine                    | -0.0278 (-0.0862, 0.0307)  | 0.3489 | 0.9986 | -0.0292 (-0.0884, 0.0299)  | 0.3298 | 0.9993 |
| MBzP      | Cystine                     | 0.0511 (-0.0962, 0.1984)   | 0.4933 | 0.9986 | 0.0620 (-0.0919, 0.2159)   | 0.4265 | 0.9993 |
| MBzP      | Ethanolamine                | 0.0066 (-0.0700, 0.0833)   | 0.8643 | 0.9986 | 0.0170 (-0.0623, 0.0963)   | 0.6725 | 0.9993 |
| MBzP      | Formate                     | -0.0547 (-0.1395, 0.0302)  | 0.2047 | 0.9986 | -0.0461 (-0.1325, 0.0402)  | 0.2925 | 0.9993 |
| MBzP      | Fumarate                    | -0.0603 (-0.1681, 0.0476)  | 0.2710 | 0.9986 | -0.0751 (-0.1874, 0.0371)  | 0.1877 | 0.9993 |
| MBzP      | Glucitol                    | -0.0252 (-0.1112, 0.0608)  | 0.5632 | 0.9986 | -0.0242 (-0.1135, 0.0651)  | 0.5923 | 0.9993 |
| MBzP      | Glutamate                   | 0.0058 (-0.0585, 0.0702)   | 0.8577 | 0.9986 | 0.0050 (-0.0614, 0.0714)   | 0.8819 | 0.9993 |
| MBzP      | Glutamine                   | -0.0334 (-0.0773, 0.0105)  | 0.1345 | 0.9986 | -0.0379 (-0.0816, 0.0059)  | 0.0892 | 0.9993 |
| MBzP      | Glutathione                 | -0.0601 (-0.2251, 0.1048)  | 0.4721 | 0.9986 | -0.0699 (-0.2391, 0.0992)  | 0.4146 | 0.9993 |
| MBzP      | Glycerol                    | 0.0303 (-0.0547, 0.1153)   | 0.4813 | 0.9986 | 0.0416 (-0.0468, 0.1300)   | 0.3530 | 0.9993 |
| MBzP      | Glycine                     | 0.0007 (-0.0692, 0.0705)   | 0.9849 | 0.9986 | 0.0051 (-0.0669, 0.0771)   | 0.8883 | 0.9993 |
| MBzP      | Hypoxanthine                | 0.0101 (-0.0555, 0.0757)   | 0.7612 | 0.9986 | 0.0200 (-0.0473, 0.0872)   | 0.5580 | 0.9993 |
| MBzP      | Inosine                     | -0.0517 (-0.2049, 0.1015)  | 0.5056 | 0.9986 | -0.0873 (-0.2427, 0.0680)  | 0.2680 | 0.9993 |
| MBzP      | Isoleucine                  | -0.0039 (-0.0808, 0.0730)  | 0.9192 | 0.9986 | 0.0072 (-0.0715, 0.0859)   | 0.8574 | 0.9993 |
| MBzP      | Kynurenine                  | -0.0347 (-0.1530, 0.0835)  | 0.5621 | 0.9986 | -0.0364 (-0.1589, 0.0861)  | 0.5576 | 0.9993 |
| MBzP      | Lactate                     | 0.0143 (-0.0355, 0.0641)   | 0.5698 | 0.9986 | 0.0215 (-0.0301, 0.0731)   | 0.4104 | 0.9993 |
| MBzP      | Leucine                     | 0.0016 (-0.0781, 0.0813)   | 0.9690 | 0.9986 | 0.0139 (-0.0673, 0.0952)   | 0.7347 | 0.9993 |
| MBzP      | Lysine                      | -0.0136 (-0.1039, 0.0767)  | 0.7660 | 0.9986 | -0.0018 (-0.0941, 0.0906)  | 0.9700 | 0.9993 |
| MBzP      | Methionine                  | 0.0029 (-0.0816, 0.0874)   | 0.9454 | 0.9986 | 0.0161 (-0.0697, 0.1018)   | 0.7116 | 0.9993 |
| MBzP      | myo-Inositol                | -0.0028 (-0.0789, 0.0734)  | 0.9429 | 0.9986 | -0.0222 (-0.1003, 0.0560)  | 0.5756 | 0.9993 |
| MBzP      | N-Acetylneuraminate         | -0.0265 (-0.1189, 0.0660)  | 0.5721 | 0.9986 | -0.0252 (-0.1215, 0.0711)  | 0.6054 | 0.9993 |
| MBzP      | NAD+                        | -0.0938 (-0.2680, 0.0804)  | 0.2885 | 0.9986 | -0.0986 (-0.2789, 0.0817)  | 0.2811 | 0.9993 |
| MBzP      | Niacinamide                 | 0.0592 (-0.2682, 0.3867)   | 0.7210 | 0.9986 | 0.0408 (-0.2971, 0.3788)   | 0.8113 | 0.9993 |
| MBzP      | O-Acetylcarnitine           | -0.0295 (-0.1101, 0.0512)  | 0.4714 | 0.9986 | -0.0278 (-0.1120, 0.0564)  | 0.5145 | 0.9993 |
| MBzP      | O-Phosphocholine            | -0.0965 (-0.3057, 0.1128)  | 0.3632 | 0.9986 | -0.0849 (-0.3038, 0.1339)  | 0.4437 | 0.9993 |
| MBzP      | O-Phosphoethanolamine       | -0.0030 (-0.1536, 0.1476)  | 0.9685 | 0.9986 | -0.0238 (-0.1783, 0.1307)  | 0.7609 | 0.9993 |
| MBzP      | Ornithine                   | -0.0140 (-0.1310, 0.1029)  | 0.8126 | 0.9986 | -0.0063 (-0.1273, 0.1146)  | 0.9174 | 0.9993 |
| MBzP      | Pantothenate                | -0.0637 (-0.1673, 0.0400)  | 0.2265 | 0.9986 | -0.0532 (-0.1599, 0.0535)  | 0.3258 | 0.9993 |
| MBzP      | Phenylalanine               | 0.0031 (-0.0777, 0.0839)   | 0.9394 | 0.9986 | 0.0133 (-0.0694, 0.0959)   | 0.7514 | 0.9993 |
| MBzP      | Proline                     | -0.0114 (-0.0806, 0.0577)  | 0.7440 | 0.9986 | -0.0019 (-0.0732, 0.0694)  | 0.9583 | 0.9993 |
| MBzP      | Pyroglutamate               | 0.0025 (-0.0931, 0.0981)   | 0.9588 | 0.9986 | 0.0081 (-0.0918, 0.1081)   | 0.8722 | 0.9993 |
| MBzP      | Serine                      | 0.0102 (-0.0720, 0.0925)   | 0.8059 | 0.9986 | 0.0192 (-0.0647, 0.1030)   | 0.6517 | 0.9993 |
| MBzP      | sn-Glycero-3-phosphocholine | -0.0108 (-0.1392, 0.1175)  | 0.8675 | 0.9986 | 0.0116 (-0.1166, 0.1397)   | 0.8585 | 0.9993 |
| MBzP      | Succinate                   | 0.0133 (-0.1318, 0.1584)   | 0.8564 | 0.9986 | 0.0284 (-0.1217, 0.1784)   | 0.7089 | 0.9993 |
| MBzP      | Taurine                     | -0.0024 (-0.0644, 0.0596)  | 0.9389 | 0.9986 | 0.0002 (-0.0640, 0.0644)   | 0.9947 | 0.9998 |
| MBzP      | Threonine                   | 0.0003 (-0.0744, 0.0751)   | 0.9930 | 0.9986 | 0.0073 (-0.0684, 0.0829)   | 0.8498 | 0.9993 |
| MBzP      | Tryptophan                  | 0.0931 (-0.0360, 0.2222)   | 0.1560 | 0.9986 | 0.1035 (-0.0289, 0.2358)   | 0.1242 | 0.9993 |
| MBzP      | Tyrosine                    | 0.0093 (-0.0664, 0.0850)   | 0.8089 | 0.9986 | 0.0181 (-0.0592, 0.0955)   | 0.6433 | 0.9993 |
| MBzP      | Uracil                      | 0.0559 (-0.0513, 0.1632)   | 0.3041 | 0.9986 | 0.0743 (-0.0366, 0.1851)   | 0.1874 | 0.9993 |
| MBzP      | Uridine                     | 0.0086 (-0.1308, 0.1480)   | 0.9029 | 0.9986 | -0.0095 (-0.1539, 0.1348)  | 0.8963 | 0.9993 |
| MBzP      | Valine                      | -0.0105 (-0.0816, 0.0606)  | 0.7706 | 0.9986 | -0.0011 (-0.0737, 0.0715)  | 0.9763 | 0.9993 |
| MCNP      | 1,3-Dihydroxyacetone        | 0.0286 (-0.1487, 0.2059)   | 0.7501 | 0.9986 | 0.0392 (-0.1503, 0.2288)   | 0.6827 | 0.9993 |

| Phthalate | Metabolite                  | Total Effect              |        |        | Direct Effect              |        |        |
|-----------|-----------------------------|---------------------------|--------|--------|----------------------------|--------|--------|
|           |                             | Estimate (95% CI)         | p      | FDR p  | Estimate (95% CI)          | p      | FDR p  |
| MCNP      | 2-Hydroxybutyrate           | 0.0433 (-0.0438, 0.1303)  | 0.3271 | 0.9986 | 0.0448 (-0.0477, 0.1372)   | 0.3397 | 0.9993 |
| MCNP      | 3-Hydroxybutyrate           | 0.1380 (-0.0573, 0.3332)  | 0.1645 | 0.9986 | 0.1356 (-0.0687, 0.3399)   | 0.1913 | 0.9993 |
| MCNP      | 4-Aminobutyrate             | -0.0113 (-0.1214, 0.0989) | 0.8396 | 0.9986 | -0.0403 (-0.1523, 0.0718)  | 0.4781 | 0.9993 |
| MCNP      | 4-Hydroxybutyrate           | -0.0892 (-0.3395, 0.1610) | 0.4816 | 0.9986 | -0.0753 (-0.3433, 0.1927)  | 0.5789 | 0.9993 |
| MCNP      | Acetate                     | -0.0036 (-0.1568, 0.1495) | 0.9627 | 0.9986 | -0.0056 (-0.1683, 0.1570)  | 0.9454 | 0.9993 |
| MCNP      | Alanine                     | -0.0434 (-0.1120, 0.0252) | 0.2128 | 0.9986 | -0.0542 (-0.1252, 0.0168)  | 0.1336 | 0.9993 |
| MCNP      | Arginine                    | -0.0289 (-0.1209, 0.0631) | 0.5347 | 0.9986 | -0.0458 (-0.1434, 0.0518)  | 0.3544 | 0.9993 |
| MCNP      | Asparagine                  | -0.0435 (-0.1237, 0.0367) | 0.2854 | 0.9986 | -0.0654 (-0.1483, 0.0175)  | 0.1208 | 0.9993 |
| MCNP      | Aspartate                   | -0.0238 (-0.0943, 0.0467) | 0.5047 | 0.9986 | -0.0313 (-0.1058, 0.0432)  | 0.4075 | 0.9993 |
| MCNP      | Betaine                     | -0.0094 (-0.0895, 0.0707) | 0.8162 | 0.9986 | -0.0093 (-0.0941, 0.0755)  | 0.8285 | 0.9993 |
| MCNP      | Carnitine                   | -0.0097 (-0.0796, 0.0601) | 0.7832 | 0.9986 | -0.0269 (-0.1012, 0.0474)  | 0.4756 | 0.9993 |
| MCNP      | Choline                     | -0.0384 (-0.1129, 0.0362) | 0.3105 | 0.9986 | -0.0336 (-0.1131, 0.0459)  | 0.4042 | 0.9993 |
| MCNP      | Creatine                    | 0.0001 (-0.0596, 0.0597)  | 0.9984 | 0.9986 | 0.0042 (-0.0575, 0.0659)   | 0.8930 | 0.9993 |
| MCNP      | Cystine                     | -0.0070 (-0.1571, 0.1430) | 0.9261 | 0.9986 | -0.0126 (-0.1730, 0.1477)  | 0.8762 | 0.9993 |
| MCNP      | Ethanolamine                | -0.0263 (-0.1041, 0.0515) | 0.5050 | 0.9986 | -0.0308 (-0.1131, 0.0515)  | 0.4608 | 0.9993 |
| MCNP      | Formate                     | -0.0245 (-0.1113, 0.0622) | 0.5768 | 0.9986 | -0.0123 (-0.1025, 0.0778)  | 0.7874 | 0.9993 |
| MCNP      | Fumarate                    | -0.0245 (-0.1347, 0.0856) | 0.6601 | 0.9986 | -0.0341 (-0.1515, 0.0833)  | 0.5664 | 0.9993 |
| MCNP      | Glucitol                    | -0.0589 (-0.1459, 0.0281) | 0.1827 | 0.9986 | -0.0623 (-0.1545, 0.0299)  | 0.1833 | 0.9993 |
| MCNP      | Glutamate                   | -0.0106 (-0.0760, 0.0548) | 0.7488 | 0.9986 | -0.0178 (-0.0867, 0.0511)  | 0.6103 | 0.9993 |
| MCNP      | Glutamine                   | -0.0056 (-0.0506, 0.0395) | 0.8074 | 0.9986 | -0.0221 (-0.0679, 0.0238)  | 0.3424 | 0.9993 |
| MCNP      | Glutathione                 | -0.0708 (-0.2385, 0.0968) | 0.4048 | 0.9986 | -0.0991 (-0.2745, 0.0763)  | 0.2656 | 0.9993 |
| MCNP      | Glycerol                    | -0.0733 (-0.1589, 0.0124) | 0.0929 | 0.9986 | -0.0726 (-0.1639, 0.0186)  | 0.1176 | 0.9993 |
| MCNP      | Glycine                     | -0.0268 (-0.0977, 0.0440) | 0.4550 | 0.9986 | -0.0331 (-0.1077, 0.0415)  | 0.3813 | 0.9993 |
| MCNP      | Hypoxanthine                | -0.0122 (-0.0789, 0.0546) | 0.7188 | 0.9986 | -0.0207 (-0.0905, 0.0492)  | 0.5596 | 0.9993 |
| MCNP      | Inosine                     | 0.0932 (-0.0620, 0.2484)  | 0.2370 | 0.9986 | 0.0681 (-0.0937, 0.2300)   | 0.4063 | 0.9993 |
| MCNP      | Isoleucine                  | -0.0406 (-0.1184, 0.0373) | 0.3048 | 0.9986 | -0.0470 (-0.1284, 0.0343)  | 0.2548 | 0.9993 |
| MCNP      | Kynurenine                  | -0.0060 (-0.1264, 0.1145) | 0.9220 | 0.9986 | -0.0254 (-0.1528, 0.1020)  | 0.6934 | 0.9993 |
| MCNP      | Lactate                     | 0.0004 (-0.0504, 0.0511)  | 0.9889 | 0.9986 | -0.0032 (-0.0570, 0.0505)  | 0.9051 | 0.9993 |
| MCNP      | Leucine                     | -0.0489 (-0.1295, 0.0317) | 0.2321 | 0.9986 | -0.0571 (-0.1410, 0.0268)  | 0.1802 | 0.9993 |
| MCNP      | Lysine                      | -0.0757 (-0.1667, 0.0152) | 0.1017 | 0.9986 | -0.0826 (-0.1774, 0.0122)  | 0.0872 | 0.9993 |
| MCNP      | Methionine                  | -0.0291 (-0.1149, 0.0567) | 0.5033 | 0.9986 | -0.0336 (-0.1226, 0.0554)  | 0.4563 | 0.9993 |
| MCNP      | myo-Inositol                | 0.0304 (-0.0469, 0.1077)  | 0.4382 | 0.9986 | 0.0290 (-0.0521, 0.1102)   | 0.4802 | 0.9993 |
| MCNP      | N-Acetylneuraminate         | -0.0917 (-0.1845, 0.0011) | 0.0527 | 0.9986 | -0.1020 (-0.2005, -0.0035) | 0.0424 | 0.9993 |
| MCNP      | NAD+                        | -0.0020 (-0.1800, 0.1759) | 0.9819 | 0.9986 | -0.0351 (-0.2233, 0.1532)  | 0.7129 | 0.9993 |
| MCNP      | Niacinamide                 | 0.0545 (-0.2786, 0.3875)  | 0.7468 | 0.9986 | 0.1110 (-0.2397, 0.4618)   | 0.5320 | 0.9993 |
| MCNP      | O-Acetylcarnitine           | 0.0063 (-0.0760, 0.0885)  | 0.8803 | 0.9986 | 0.0005 (-0.0872, 0.0881)   | 0.9919 | 0.9998 |
| MCNP      | O-Phosphocholine            | 0.0594 (-0.1538, 0.2727)  | 0.5822 | 0.9986 | 0.0213 (-0.2066, 0.2493)   | 0.8532 | 0.9993 |
| MCNP      | O-Phosphoethanolamine       | -0.0358 (-0.1888, 0.1172) | 0.6438 | 0.9986 | -0.0642 (-0.2244, 0.0960)  | 0.4290 | 0.9993 |
| MCNP      | Ornithine                   | -0.0976 (-0.2153, 0.0202) | 0.1036 | 0.9986 | -0.0952 (-0.2197, 0.0293)  | 0.1327 | 0.9993 |
| MCNP      | Pantothenate                | 0.0618 (-0.0437, 0.1673)  | 0.2487 | 0.9986 | 0.0511 (-0.0599, 0.1621)   | 0.3639 | 0.9993 |
| MCNP      | Phenylalanine               | -0.0700 (-0.1512, 0.0112) | 0.0906 | 0.9986 | -0.0785 (-0.1632, 0.0063)  | 0.0693 | 0.9993 |
| MCNP      | Proline                     | -0.0408 (-0.1108, 0.0292) | 0.2507 | 0.9986 | -0.0507 (-0.1242, 0.0228)  | 0.1747 | 0.9993 |
| MCNP      | Pyroglutamate               | -0.0765 (-0.1729, 0.0198) | 0.1183 | 0.9986 | -0.0748 (-0.1778, 0.0283)  | 0.1533 | 0.9993 |
| MCNP      | Serine                      | -0.0459 (-0.1292, 0.0374) | 0.2775 | 0.9986 | -0.0606 (-0.1471, 0.0259)  | 0.1680 | 0.9993 |
| MCNP      | sn-Glycero-3-phosphocholine | 0.0281 (-0.1024, 0.1586)  | 0.6710 | 0.9986 | 0.0362 (-0.0968, 0.1693)   | 0.5908 | 0.9993 |
| MCNP      | Succinate                   | 0.0710 (-0.0760, 0.2180)  | 0.3412 | 0.9986 | 0.0618 (-0.0939, 0.2174)   | 0.4336 | 0.9993 |
| MCNP      | Taurine                     | 0.0003 (-0.0627, 0.0634)  | 0.9917 | 0.9986 | -0.0122 (-0.0789, 0.0545)  | 0.7180 | 0.9993 |
| MCNP      | Threonine                   | -0.0247 (-0.1006, 0.0512) | 0.5210 | 0.9986 | -0.0359 (-0.1143, 0.0425)  | 0.3660 | 0.9993 |
| MCNP      | Tryptophan                  | -0.0212 (-0.1536, 0.1111) | 0.7512 | 0.9986 | -0.0310 (-0.1697, 0.1078)  | 0.6596 | 0.9993 |
| MCNP      | Tyrosine                    | -0.0478 (-0.1244, 0.0288) | 0.2191 | 0.9986 | -0.0607 (-0.1404, 0.0190)  | 0.1344 | 0.9993 |
| MCNP      | Uracil                      | -0.0579 (-0.1670, 0.0512) | 0.2957 | 0.9986 | -0.0485 (-0.1643, 0.0672)  | 0.4083 | 0.9993 |
| MCNP      | Uridine                     | -0.0027 (-0.1445, 0.1390) | 0.9699 | 0.9986 | -0.0109 (-0.1609, 0.1391)  | 0.8862 | 0.9993 |
| MCNP      | Valine                      | -0.0377 (-0.1098, 0.0343) | 0.3019 | 0.9986 | -0.0451 (-0.1201, 0.0300)  | 0.2366 | 0.9993 |
| MCOP      | 1,3-Dihydroxyacetone        | 0.0318 (-0.1210, 0.1847)  | 0.6809 | 0.9986 | 0.0261 (-0.1338, 0.1860)   | 0.7470 | 0.9993 |
| MCOP      | 2-Hydroxybutyrate           | -0.0055 (-0.0808, 0.0698) | 0.8853 | 0.9986 | -0.0118 (-0.0900, 0.0665)  | 0.7666 | 0.9993 |
| MCOP      | 3-Hydroxybutyrate           | 0.0302 (-0.1394, 0.1998)  | 0.7249 | 0.9986 | 0.0454 (-0.1280, 0.2187)   | 0.6052 | 0.9993 |
| MCOP      | 4-Aminobutyrate             | -0.0216 (-0.1165, 0.0733) | 0.6537 | 0.9986 | -0.0337 (-0.1282, 0.0608)  | 0.4815 | 0.9993 |
| MCOP      | 4-Hydroxybutyrate           | 0.0182 (-0.1979, 0.2344)  | 0.8677 | 0.9986 | 0.0238 (-0.2026, 0.2501)   | 0.8356 | 0.9993 |
| MCOP      | Acetate                     | 0.0609 (-0.0707, 0.1925)  | 0.3617 | 0.9986 | 0.0719 (-0.0647, 0.2085)   | 0.2994 | 0.9993 |
| MCOP      | Alanine                     | -0.0038 (-0.0633, 0.0557) | 0.8991 | 0.9986 | -0.0011 (-0.0616, 0.0594)  | 0.9710 | 0.9993 |

| Phthalate | Metabolite                  | Total Effect              |        |        | Direct Effect             |        |        |
|-----------|-----------------------------|---------------------------|--------|--------|---------------------------|--------|--------|
|           |                             | Estimate (95% CI)         | p      | FDR p  | Estimate (95% CI)         | p      | FDR p  |
| MCOP      | Arginine                    | -0.0246 (-0.1039, 0.0547) | 0.5408 | 0.9986 | -0.0267 (-0.1092, 0.0558) | 0.5222 | 0.9993 |
| MCOP      | Asparagine                  | -0.0306 (-0.0998, 0.0386) | 0.3834 | 0.9986 | -0.0294 (-0.0998, 0.0410) | 0.4102 | 0.9993 |
| MCOP      | Aspartate                   | -0.0005 (-0.0614, 0.0604) | 0.9877 | 0.9986 | 0.0018 (-0.0612, 0.0648)  | 0.9557 | 0.9993 |
| MCOP      | Betaine                     | -0.0176 (-0.0866, 0.0514) | 0.6149 | 0.9986 | -0.0147 (-0.0862, 0.0568) | 0.6848 | 0.9993 |
| MCOP      | Carnitine                   | -0.0472 (-0.1069, 0.0125) | 0.1199 | 0.9986 | -0.0559 (-0.1179, 0.0061) | 0.0766 | 0.9993 |
| MCOP      | Choline                     | -0.0211 (-0.0855, 0.0433) | 0.5182 | 0.9986 | -0.0161 (-0.0833, 0.0511) | 0.6359 | 0.9993 |
| MCOP      | Creatine                    | 0.0040 (-0.0474, 0.0554)  | 0.8786 | 0.9986 | 0.0069 (-0.0452, 0.0590)  | 0.7933 | 0.9993 |
| MCOP      | Cystine                     | 0.0185 (-0.1108, 0.1479)  | 0.7773 | 0.9986 | 0.0180 (-0.1173, 0.1532)  | 0.7931 | 0.9993 |
| MCOP      | Ethanolamine                | 0.0070 (-0.0602, 0.0743)  | 0.8360 | 0.9986 | 0.0066 (-0.0629, 0.0762)  | 0.8504 | 0.9993 |
| MCOP      | Formate                     | 0.0041 (-0.0708, 0.0790)  | 0.9139 | 0.9986 | 0.0173 (-0.0587, 0.0934)  | 0.6522 | 0.9993 |
| MCOP      | Fumarate                    | -0.0322 (-0.1271, 0.0627) | 0.5030 | 0.9986 | -0.0349 (-0.1339, 0.0641) | 0.4865 | 0.9993 |
| MCOP      | Glucitol                    | -0.0279 (-0.1033, 0.0475) | 0.4656 | 0.9986 | -0.0204 (-0.0987, 0.0579) | 0.6067 | 0.9993 |
| MCOP      | Glutamate                   | 0.0124 (-0.0440, 0.0687)  | 0.6647 | 0.9986 | 0.0165 (-0.0417, 0.0746)  | 0.5762 | 0.9993 |
| MCOP      | Glutamine                   | -0.0019 (-0.0407, 0.0369) | 0.9231 | 0.9986 | -0.0084 (-0.0472, 0.0304) | 0.6691 | 0.9993 |
| MCOP      | Glutathione                 | -0.0933 (-0.2374, 0.0507) | 0.2021 | 0.9986 | -0.1070 (-0.2545, 0.0404) | 0.1533 | 0.9993 |
| MCOP      | Glycerol                    | -0.0309 (-0.1054, 0.0435) | 0.4126 | 0.9986 | -0.0263 (-0.1039, 0.0513) | 0.5037 | 0.9993 |
| MCOP      | Glycine                     | -0.0048 (-0.0660, 0.0564) | 0.8774 | 0.9986 | 0.0019 (-0.0612, 0.0650)  | 0.9527 | 0.9993 |
| MCOP      | Hypoxanthine                | -0.0103 (-0.0679, 0.0472) | 0.7233 | 0.9986 | -0.0086 (-0.0676, 0.0504) | 0.7741 | 0.9993 |
| MCOP      | Inosine                     | 0.0281 (-0.1064, 0.1626)  | 0.6803 | 0.9986 | 0.0110 (-0.1259, 0.1479)  | 0.8739 | 0.9993 |
| MCOP      | Isoleucine                  | -0.0082 (-0.0757, 0.0592) | 0.8094 | 0.9986 | -0.0001 (-0.0691, 0.0689) | 0.9985 | 0.9998 |
| MCOP      | Kynurenine                  | -0.0856 (-0.1884, 0.0171) | 0.1016 | 0.9986 | -0.0899 (-0.1962, 0.0164) | 0.0965 | 0.9993 |
| MCOP      | Lactate                     | 0.0115 (-0.0322, 0.0551)  | 0.6042 | 0.9986 | 0.0105 (-0.0348, 0.0558)  | 0.6471 | 0.9993 |
| MCOP      | Leucine                     | -0.0173 (-0.0871, 0.0526) | 0.6255 | 0.9986 | -0.0090 (-0.0803, 0.0623) | 0.8026 | 0.9993 |
| MCOP      | Lysine                      | -0.0150 (-0.0942, 0.0642) | 0.7089 | 0.9986 | -0.0037 (-0.0847, 0.0773) | 0.9285 | 0.9993 |
| MCOP      | Methionine                  | 0.0008 (-0.0733, 0.0749)  | 0.9821 | 0.9986 | 0.0115 (-0.0637, 0.0867)  | 0.7620 | 0.9993 |
| MCOP      | myo-Inositol                | 0.0365 (-0.0300, 0.1029)  | 0.2799 | 0.9986 | 0.0383 (-0.0300, 0.1066)  | 0.2687 | 0.9993 |
| MCOP      | N-Acetylneuraminate         | -0.0718 (-0.1520, 0.0084) | 0.0788 | 0.9986 | -0.0680 (-0.1516, 0.0157) | 0.1103 | 0.9993 |
| MCOP      | NAD+                        | -0.0368 (-0.1901, 0.1165) | 0.6354 | 0.9986 | -0.0591 (-0.2176, 0.0994) | 0.4619 | 0.9993 |
| MCOP      | Niacinamide                 | 0.0646 (-0.2225, 0.3517)  | 0.6569 | 0.9986 | 0.0651 (-0.2310, 0.3613)  | 0.6639 | 0.9993 |
| MCOP      | O-Acetylcarnitine           | -0.0320 (-0.1027, 0.0386) | 0.3713 | 0.9986 | -0.0347 (-0.1084, 0.0389) | 0.3524 | 0.9993 |
| MCOP      | O-Phosphocholine            | -0.1533 (-0.3354, 0.0288) | 0.0981 | 0.9986 | -0.1815 (-0.3710, 0.0080) | 0.0604 | 0.9993 |
| MCOP      | O-Phosphoethanolamine       | -0.1181 (-0.2485, 0.0123) | 0.0754 | 0.9986 | -0.1197 (-0.2534, 0.0140) | 0.0789 | 0.9993 |
| MCOP      | Ornithine                   | -0.0052 (-0.1078, 0.0974) | 0.9197 | 0.9986 | 0.0083 (-0.0977, 0.1144)  | 0.8764 | 0.9993 |
| MCOP      | Pantothenate                | 0.0061 (-0.0853, 0.0975)  | 0.8952 | 0.9986 | -0.0133 (-0.1072, 0.0806) | 0.7794 | 0.9993 |
| MCOP      | Phenylalanine               | -0.0317 (-0.1023, 0.0390) | 0.3768 | 0.9986 | -0.0234 (-0.0958, 0.0489) | 0.5223 | 0.9993 |
| MCOP      | Proline                     | -0.0092 (-0.0699, 0.0514) | 0.7642 | 0.9986 | -0.0058 (-0.0683, 0.0567) | 0.8546 | 0.9993 |
| MCOP      | Pyroglutamate               | 0.0019 (-0.0819, 0.0858)  | 0.9637 | 0.9986 | 0.0042 (-0.0834, 0.0919)  | 0.9237 | 0.9993 |
| MCOP      | Serine                      | -0.0103 (-0.0824, 0.0619) | 0.7788 | 0.9986 | -0.0038 (-0.0774, 0.0697) | 0.9186 | 0.9993 |
| MCOP      | sn-Glycero-3-phosphocholine | -0.0436 (-0.1559, 0.0688) | 0.4442 | 0.9986 | -0.0299 (-0.1421, 0.0824) | 0.5990 | 0.9993 |
| MCOP      | Succinate                   | 0.1120 (-0.0137, 0.2377)  | 0.0803 | 0.9986 | 0.1124 (-0.0176, 0.2425)  | 0.0896 | 0.9993 |
| MCOP      | Taurine                     | 0.0032 (-0.0511, 0.0576)  | 0.9068 | 0.9986 | 0.0008 (-0.0555, 0.0571)  | 0.9783 | 0.9993 |
| MCOP      | Threonine                   | -0.0288 (-0.0941, 0.0366) | 0.3852 | 0.9986 | -0.0224 (-0.0887, 0.0438) | 0.5034 | 0.9993 |
| MCOP      | Tryptophan                  | 0.0985 (-0.0143, 0.2113)  | 0.0863 | 0.9986 | 0.1134 (-0.0020, 0.2287)  | 0.0540 | 0.9993 |
| MCOP      | Tyrosine                    | -0.0085 (-0.0749, 0.0579) | 0.7998 | 0.9986 | -0.0022 (-0.0701, 0.0657) | 0.9491 | 0.9993 |
| MCOP      | Uracil                      | -0.0141 (-0.1085, 0.0803) | 0.7683 | 0.9986 | -0.0066 (-0.1045, 0.0913) | 0.8943 | 0.9993 |
| MCOP      | Uridine                     | 0.0738 (-0.0478, 0.1953)  | 0.2320 | 0.9986 | 0.0869 (-0.0387, 0.2125)  | 0.1732 | 0.9993 |
| MCOP      | Valine                      | -0.0117 (-0.0740, 0.0506) | 0.7110 | 0.9986 | -0.0044 (-0.0680, 0.0593) | 0.8924 | 0.9993 |
| MCPP      | 1,3-Dihydroxyacetone        | -0.0100 (-0.2282, 0.2082) | 0.9280 | 0.9986 | -0.0065 (-0.2363, 0.2232) | 0.9553 | 0.9993 |
| MCPP      | 2-Hydroxybutyrate           | -0.0284 (-0.1357, 0.0789) | 0.6014 | 0.9986 | -0.0296 (-0.1419, 0.0827) | 0.6028 | 0.9993 |
| MCPP      | 3-Hydroxybutyrate           | 0.0678 (-0.1740, 0.3096)  | 0.5801 | 0.9986 | 0.0618 (-0.1872, 0.3108)  | 0.6241 | 0.9993 |
| MCPP      | 4-Aminobutyrate             | -0.0326 (-0.1680, 0.1028) | 0.6349 | 0.9986 | -0.0398 (-0.1756, 0.0960) | 0.5628 | 0.9993 |
| MCPP      | 4-Hydroxybutyrate           | -0.0170 (-0.3255, 0.2914) | 0.9131 | 0.9986 | -0.0095 (-0.3346, 0.3156) | 0.9540 | 0.9993 |
| MCPP      | Acetate                     | -0.0052 (-0.1936, 0.1832) | 0.9569 | 0.9986 | 0.0120 (-0.1851, 0.2090)  | 0.9044 | 0.9993 |
| MCPP      | Alanine                     | -0.0252 (-0.1101, 0.0596) | 0.5570 | 0.9986 | -0.0201 (-0.1069, 0.0667) | 0.6473 | 0.9993 |
| MCPP      | Arginine                    | -0.0288 (-0.1421, 0.0844) | 0.6155 | 0.9986 | -0.0348 (-0.1533, 0.0837) | 0.5617 | 0.9993 |
| MCPP      | Asparagine                  | -0.0316 (-0.1306, 0.0673) | 0.5279 | 0.9986 | -0.0394 (-0.1406, 0.0617) | 0.4419 | 0.9993 |
| MCPP      | Aspartate                   | 0.0183 (-0.0685, 0.1051)  | 0.6773 | 0.9986 | 0.0132 (-0.0772, 0.1037)  | 0.7729 | 0.9993 |
| MCPP      | Betaine                     | -0.0591 (-0.1572, 0.0389) | 0.2348 | 0.9986 | -0.0668 (-0.1688, 0.0351) | 0.1969 | 0.9993 |
| MCPP      | Carnitine                   | -0.0135 (-0.0995, 0.0724) | 0.7557 | 0.9986 | -0.0255 (-0.1156, 0.0645) | 0.5756 | 0.9993 |
| MCPP      | Choline                     | -0.0346 (-0.1265, 0.0573) | 0.4577 | 0.9986 | -0.0228 (-0.1193, 0.0737) | 0.6407 | 0.9993 |

| Phthalate | Metabolite                  | Total Effect               |        |        | Direct Effect              |        |        |
|-----------|-----------------------------|----------------------------|--------|--------|----------------------------|--------|--------|
|           |                             | Estimate (95% CI)          | p      | FDR p  | Estimate (95% CI)          | p      | FDR p  |
| MCPP      | Creatine                    | -0.0436 (-0.1165, 0.0293)  | 0.2390 | 0.9986 | -0.0451 (-0.1194, 0.0293)  | 0.2326 | 0.9993 |
| MCPP      | Cystine                     | -0.0196 (-0.2043, 0.1650)  | 0.8336 | 0.9986 | -0.0175 (-0.2118, 0.1767)  | 0.8585 | 0.9993 |
| MCPP      | Ethanolamine                | -0.0021 (-0.0980, 0.0938)  | 0.9658 | 0.9986 | -0.0001 (-0.1000, 0.0998)  | 0.9984 | 0.9998 |
| MCPP      | Formate                     | -0.0372 (-0.1438, 0.0695)  | 0.4914 | 0.9986 | -0.0151 (-0.1243, 0.0941)  | 0.7844 | 0.9993 |
| MCPP      | Fumarate                    | 0.0247 (-0.1108, 0.1603)   | 0.7185 | 0.9986 | 0.0122 (-0.1302, 0.1546)   | 0.8654 | 0.9993 |
| MCPP      | Glucitol                    | -0.0270 (-0.1347, 0.0807)  | 0.6208 | 0.9986 | -0.0177 (-0.1302, 0.0948)  | 0.7560 | 0.9993 |
| MCPP      | Glutamate                   | 0.0227 (-0.0577, 0.1031)   | 0.5769 | 0.9986 | 0.0253 (-0.0582, 0.1087)   | 0.5501 | 0.9993 |
| MCPP      | Glutamine                   | 0.0062 (-0.0492, 0.0616)   | 0.8251 | 0.9986 | -0.0082 (-0.0639, 0.0476)  | 0.7721 | 0.9993 |
| MCPP      | Glutathione                 | -0.0856 (-0.2919, 0.1208)  | 0.4134 | 0.9986 | -0.1040 (-0.3167, 0.1088)  | 0.3352 | 0.9993 |
| MCPP      | Glycerol                    | -0.0567 (-0.1628, 0.0494)  | 0.2923 | 0.9986 | -0.0443 (-0.1557, 0.0670)  | 0.4322 | 0.9993 |
| MCPP      | Glycine                     | 0.0019 (-0.0854, 0.0893)   | 0.9651 | 0.9986 | 0.0066 (-0.0841, 0.0973)   | 0.8857 | 0.9993 |
| MCPP      | Hypoxanthine                | -0.0116 (-0.0937, 0.0705)  | 0.7805 | 0.9986 | -0.0093 (-0.0941, 0.0755)  | 0.8286 | 0.9993 |
| MCPP      | Inosine                     | 0.0897 (-0.1017, 0.2810)   | 0.3557 | 0.9986 | 0.0536 (-0.1428, 0.2500)   | 0.5898 | 0.9993 |
| MCPP      | Isoleucine                  | -0.0245 (-0.1206, 0.0717)  | 0.6152 | 0.9986 | -0.0162 (-0.1153, 0.0828)  | 0.7463 | 0.9993 |
| MCPP      | Kynurenine                  | -0.0431 (-0.1911, 0.1049)  | 0.5655 | 0.9986 | -0.0584 (-0.2125, 0.0957)  | 0.4546 | 0.9993 |
| MCPP      | Lactate                     | 0.0036 (-0.0588, 0.0660)   | 0.9095 | 0.9986 | 0.0045 (-0.0606, 0.0697)   | 0.8907 | 0.9993 |
| MCPP      | Leucine                     | -0.0450 (-0.1444, 0.0544)  | 0.3721 | 0.9986 | -0.0382 (-0.1404, 0.0639)  | 0.4605 | 0.9993 |
| MCPP      | Lysine                      | -0.0418 (-0.1546, 0.0710)  | 0.4646 | 0.9986 | -0.0336 (-0.1497, 0.0826)  | 0.5683 | 0.9993 |
| MCPP      | Methionine                  | -0.0286 (-0.1342, 0.0770)  | 0.5928 | 0.9986 | -0.0148 (-0.1228, 0.0931)  | 0.7860 | 0.9993 |
| MCPP      | myo-Inositol                | 0.0301 (-0.0651, 0.1253)   | 0.5325 | 0.9986 | 0.0248 (-0.0736, 0.1232)   | 0.6188 | 0.9993 |
| MCPP      | N-Acetylneuraminate         | -0.0540 (-0.1695, 0.0614)  | 0.3561 | 0.9986 | -0.0491 (-0.1701, 0.0719)  | 0.4235 | 0.9993 |
| MCPP      | NAD+                        | 0.0034 (-0.2155, 0.2223)   | 0.9757 | 0.9986 | -0.0284 (-0.2565, 0.1997)  | 0.8058 | 0.9993 |
| MCPP      | Niacinamide                 | 0.2743 (-0.1328, 0.6814)   | 0.1847 | 0.9986 | 0.2971 (-0.1251, 0.7192)   | 0.1661 | 0.9993 |
| MCPP      | O-Acetylcarntine            | -0.0134 (-0.1145, 0.0878)  | 0.7942 | 0.9986 | -0.0211 (-0.1272, 0.0850)  | 0.6944 | 0.9993 |
| MCPP      | O-Phosphocholine            | -0.0870 (-0.3493, 0.1752)  | 0.5124 | 0.9986 | -0.1304 (-0.4056, 0.1447)  | 0.3498 | 0.9993 |
| MCPP      | O-Phosphoethanolamine       | -0.0944 (-0.2821, 0.0933)  | 0.3214 | 0.9986 | -0.1251 (-0.3183, 0.0681)  | 0.2023 | 0.9993 |
| MCPP      | Ornithine                   | -0.0421 (-0.1883, 0.1042)  | 0.5702 | 0.9986 | -0.0264 (-0.1785, 0.1258)  | 0.7322 | 0.9993 |
| MCPP      | Pantothenate                | 0.0081 (-0.1223, 0.1386)   | 0.9019 | 0.9986 | -0.0124 (-0.1473, 0.1225)  | 0.8557 | 0.9993 |
| MCPP      | Phenylalanine               | -0.0639 (-0.1644, 0.0365)  | 0.2103 | 0.9986 | -0.0554 (-0.1590, 0.0482)  | 0.2915 | 0.9993 |
| MCPP      | Proline                     | -0.0213 (-0.1078, 0.0652)  | 0.6273 | 0.9986 | -0.0166 (-0.1062, 0.0731)  | 0.7150 | 0.9993 |
| MCPP      | Pyroglutamate               | -0.0273 (-0.1468, 0.0923)  | 0.6523 | 0.9986 | -0.0184 (-0.1442, 0.1074)  | 0.7730 | 0.9993 |
| MCPP      | Serine                      | -0.0151 (-0.1181, 0.0878)  | 0.7715 | 0.9986 | -0.0113 (-0.1169, 0.0943)  | 0.8327 | 0.9993 |
| MCPP      | sn-Glycero-3-phosphocholine | -0.0096 (-0.1702, 0.1511)  | 0.9063 | 0.9986 | 0.0094 (-0.1519, 0.1708)   | 0.9079 | 0.9993 |
| MCPP      | Succinate                   | 0.0451 (-0.1363, 0.2265)   | 0.6235 | 0.9986 | 0.0471 (-0.1417, 0.2360)   | 0.6221 | 0.9993 |
| MCPP      | Taurine                     | 0.0231 (-0.0543, 0.1006)   | 0.5559 | 0.9986 | 0.0171 (-0.0637, 0.0978)   | 0.6764 | 0.9993 |
| MCPP      | Threonine                   | -0.0268 (-0.1202, 0.0666)  | 0.5714 | 0.9986 | -0.0233 (-0.1185, 0.0718)  | 0.6283 | 0.9993 |
| MCPP      | Tryptophan                  | 0.0133 (-0.1495, 0.1762)   | 0.8714 | 0.9986 | 0.0242 (-0.1440, 0.1924)   | 0.7764 | 0.9993 |
| MCPP      | Tyrosine                    | -0.0188 (-0.1135, 0.0759)  | 0.6956 | 0.9986 | -0.0158 (-0.1132, 0.0816)  | 0.7488 | 0.9993 |
| MCPP      | Uracil                      | -0.0530 (-0.1875, 0.0814)  | 0.4366 | 0.9986 | -0.0333 (-0.1738, 0.1072)  | 0.6397 | 0.9993 |
| MCPP      | Uridine                     | 0.0830 (-0.0908, 0.2568)   | 0.3463 | 0.9986 | 0.0839 (-0.0972, 0.2650)   | 0.3607 | 0.9993 |
| MCPP      | Valine                      | -0.0244 (-0.1133, 0.0645)  | 0.5881 | 0.9986 | -0.0175 (-0.1089, 0.0739)  | 0.7057 | 0.9993 |
| MECPP     | 1,3-Dihydroxyacetone        | 0.0174 (-0.1753, 0.2102)   | 0.8581 | 0.9986 | 0.0000 (-0.2046, 0.2046)   | 1.0000 | 1.0000 |
| MECPP     | 2-Hydroxybutyrate           | -0.0281 (-0.1228, 0.0667)  | 0.5592 | 0.9986 | -0.0511 (-0.1508, 0.0486)  | 0.3122 | 0.9993 |
| MECPP     | 3-Hydroxybutyrate           | -0.0751 (-0.2885, 0.1384)  | 0.4877 | 0.9986 | -0.0751 (-0.2967, 0.1465)  | 0.5036 | 0.9993 |
| MECPP     | 4-Aminobutyrate             | -0.0137 (-0.1334, 0.1060)  | 0.8206 | 0.9986 | 0.0053 (-0.1158, 0.1265)   | 0.9305 | 0.9993 |
| MECPP     | 4-Hydroxybutyrate           | -0.0563 (-0.3286, 0.2161)  | 0.6834 | 0.9986 | -0.0947 (-0.3837, 0.1944)  | 0.5180 | 0.9993 |
| MECPP     | Acetate                     | -0.0275 (-0.1939, 0.1389)  | 0.7441 | 0.9986 | -0.0241 (-0.1995, 0.1514)  | 0.7865 | 0.9993 |
| MECPP     | Alanine                     | -0.0022 (-0.0773, 0.0728)  | 0.9532 | 0.9986 | 0.0144 (-0.0629, 0.0917)   | 0.7134 | 0.9993 |
| MECPP     | Arginine                    | 0.0007 (-0.0994, 0.1009)   | 0.9887 | 0.9986 | 0.0102 (-0.0955, 0.1158)   | 0.8492 | 0.9993 |
| MECPP     | Asparagine                  | -0.0041 (-0.0917, 0.0834)  | 0.9257 | 0.9986 | 0.0174 (-0.0729, 0.1077)   | 0.7039 | 0.9993 |
| MECPP     | Aspartate                   | -0.0002 (-0.0770, 0.0765)  | 0.9955 | 0.9986 | 0.0013 (-0.0793, 0.0820)   | 0.9736 | 0.9993 |
| MECPP     | Betaine                     | -0.0906 (-0.1762, -0.0050) | 0.0382 | 0.9986 | -0.0929 (-0.1829, -0.0030) | 0.0429 | 0.9993 |
| MECPP     | Carnitine                   | -0.0629 (-0.1381, 0.0122)  | 0.0998 | 0.9986 | -0.0625 (-0.1420, 0.0171)  | 0.1225 | 0.9993 |
| MECPP     | Choline                     | 0.0004 (-0.0810, 0.0817)   | 0.9930 | 0.9986 | 0.0054 (-0.0806, 0.0914)   | 0.9012 | 0.9993 |
| MECPP     | Creatine                    | 0.0130 (-0.0518, 0.0777)   | 0.6929 | 0.9986 | 0.0104 (-0.0562, 0.0770)   | 0.7586 | 0.9993 |
| MECPP     | Cystine                     | 0.1060 (-0.0561, 0.2680)   | 0.1979 | 0.9986 | 0.1149 (-0.0569, 0.2867)   | 0.1880 | 0.9993 |
| MECPP     | Ethanolamine                | -0.0129 (-0.0977, 0.0718)  | 0.7630 | 0.9986 | -0.0031 (-0.0921, 0.0859)  | 0.9451 | 0.9993 |
| MECPP     | Formate                     | -0.0283 (-0.1226, 0.0660)  | 0.5535 | 0.9986 | -0.0205 (-0.1178, 0.0767)  | 0.6768 | 0.9993 |
| MECPP     | Fumarate                    | -0.0150 (-0.1347, 0.1048)  | 0.8052 | 0.9986 | -0.0157 (-0.1425, 0.1112)  | 0.8072 | 0.9993 |
| MECPP     | Glucitol                    | -0.0594 (-0.1541, 0.0352)  | 0.2165 | 0.9986 | -0.0564 (-0.1561, 0.0433)  | 0.2648 | 0.9993 |

| Phthalate | Metabolite                  | Total Effect               |        |        | Direct Effect              |        |        |
|-----------|-----------------------------|----------------------------|--------|--------|----------------------------|--------|--------|
|           |                             | Estimate (95% CI)          | p      | FDR p  | Estimate (95% CI)          | p      | FDR p  |
| MECPP     | Glutamate                   | 0.0016 (-0.0695, 0.0727)   | 0.9650 | 0.9986 | 0.0060 (-0.0684, 0.0804)   | 0.8731 | 0.9993 |
| MECPP     | Glutamine                   | -0.0059 (-0.0548, 0.0430)  | 0.8109 | 0.9986 | -0.0053 (-0.0550, 0.0443)  | 0.8325 | 0.9993 |
| MECPP     | Glutathione                 | -0.1571 (-0.3377, 0.0235)  | 0.0877 | 0.9986 | -0.1801 (-0.3675, 0.0074)  | 0.0596 | 0.9993 |
| MECPP     | Glycerol                    | 0.0190 (-0.0750, 0.1131)   | 0.6896 | 0.9986 | 0.0281 (-0.0712, 0.1275)   | 0.5758 | 0.9993 |
| MECPP     | Glycine                     | 0.0109 (-0.0662, 0.0881)   | 0.7801 | 0.9986 | 0.0258 (-0.0548, 0.1064)   | 0.5277 | 0.9993 |
| MECPP     | Hypoxanthine                | -0.0074 (-0.0800, 0.0652)  | 0.8404 | 0.9986 | 0.0048 (-0.0708, 0.0803)   | 0.9009 | 0.9993 |
| MECPP     | Inosine                     | -0.0545 (-0.2239, 0.1149)  | 0.5253 | 0.9986 | -0.0909 (-0.2652, 0.0835)  | 0.3042 | 0.9993 |
| MECPP     | Isoleucine                  | 0.0041 (-0.0809, 0.0891)   | 0.9246 | 0.9986 | 0.0261 (-0.0620, 0.1143)   | 0.5583 | 0.9993 |
| MECPP     | Kynurenine                  | -0.1094 (-0.2389, 0.0201)  | 0.0971 | 0.9986 | -0.0975 (-0.2340, 0.0389)  | 0.1595 | 0.9993 |
| MECPP     | Lactate                     | 0.0126 (-0.0424, 0.0677)   | 0.6509 | 0.9986 | 0.0157 (-0.0422, 0.0736)   | 0.5925 | 0.9993 |
| MECPP     | Leucine                     | -0.0029 (-0.0910, 0.0852)  | 0.9480 | 0.9986 | 0.0210 (-0.0702, 0.1121)   | 0.6495 | 0.9993 |
| MECPP     | Lysine                      | -0.0082 (-0.1081, 0.0916)  | 0.8710 | 0.9986 | 0.0220 (-0.0815, 0.1255)   | 0.6747 | 0.9993 |
| MECPP     | Methionine                  | 0.0324 (-0.0608, 0.1257)   | 0.4925 | 0.9986 | 0.0586 (-0.0371, 0.1542)   | 0.2277 | 0.9993 |
| MECPP     | myo-Inositol                | 0.0484 (-0.0353, 0.1322)   | 0.2546 | 0.9986 | 0.0355 (-0.0520, 0.1230)   | 0.4237 | 0.9993 |
| MECPP     | N-Acetylneuraminate         | -0.0653 (-0.1670, 0.0364)  | 0.2062 | 0.9986 | -0.0593 (-0.1668, 0.0483)  | 0.2776 | 0.9993 |
| MECPP     | NAD+                        | -0.1184 (-0.3106, 0.0739)  | 0.2254 | 0.9986 | -0.1305 (-0.3323, 0.0713)  | 0.2029 | 0.9993 |
| MECPP     | Niacinamide                 | 0.1477 (-0.2135, 0.5089)   | 0.4199 | 0.9986 | 0.1388 (-0.2394, 0.5170)   | 0.4689 | 0.9993 |
| MECPP     | O-Acetylcarnitine           | -0.0805 (-0.1687, 0.0078)  | 0.0735 | 0.9986 | -0.0726 (-0.1662, 0.0211)  | 0.1277 | 0.9993 |
| MECPP     | O-Phosphocholine            | -0.2919 (-0.5181, -0.0656) | 0.0119 | 0.9986 | -0.2944 (-0.5346, -0.0542) | 0.0167 | 0.9993 |
| MECPP     | O-Phosphoethanolamine       | -0.1822 (-0.3456, -0.0189) | 0.0290 | 0.9986 | -0.1818 (-0.3519, -0.0116) | 0.0365 | 0.9993 |
| MECPP     | Ornithine                   | -0.0129 (-0.1422, 0.1165)  | 0.8441 | 0.9986 | 0.0007 (-0.1349, 0.1363)   | 0.9920 | 0.9998 |
| MECPP     | Pantothenate                | 0.0375 (-0.0776, 0.1525)   | 0.5204 | 0.9986 | 0.0392 (-0.0808, 0.1591)   | 0.5192 | 0.9993 |
| MECPP     | Phenylalanine               | 0.0071 (-0.0822, 0.0964)   | 0.8754 | 0.9986 | 0.0266 (-0.0660, 0.1192)   | 0.5708 | 0.9993 |
| MECPP     | Proline                     | 0.0304 (-0.0459, 0.1067)   | 0.4314 | 0.9986 | 0.0458 (-0.0337, 0.1253)   | 0.2559 | 0.9993 |
| MECPP     | Pyroglutamate               | 0.0581 (-0.0472, 0.1633)   | 0.2769 | 0.9986 | 0.0582 (-0.0534, 0.1698)   | 0.3037 | 0.9993 |
| MECPP     | Serine                      | 0.0189 (-0.0720, 0.1098)   | 0.6820 | 0.9986 | 0.0428 (-0.0510, 0.1365)   | 0.3683 | 0.9993 |
| MECPP     | sn-Glycero-3-phosphocholine | -0.0757 (-0.2170, 0.0656)  | 0.2913 | 0.9986 | -0.0312 (-0.1748, 0.1124)  | 0.6678 | 0.9993 |
| MECPP     | Succinate                   | -0.0432 (-0.2034, 0.1170)  | 0.5946 | 0.9986 | -0.0393 (-0.2075, 0.1290)  | 0.6449 | 0.9993 |
| MECPP     | Taurine                     | -0.0262 (-0.0945, 0.0422)  | 0.4498 | 0.9986 | -0.0225 (-0.0944, 0.0494)  | 0.5362 | 0.9993 |
| MECPP     | Threonine                   | 0.0089 (-0.0737, 0.0915)   | 0.8315 | 0.9986 | 0.0324 (-0.0523, 0.1170)   | 0.4507 | 0.9993 |
| MECPP     | Tryptophan                  | 0.1081 (-0.0345, 0.2507)   | 0.1360 | 0.9986 | 0.1235 (-0.0247, 0.2717)   | 0.1015 | 0.9993 |
| MECPP     | Tyrosine                    | 0.0031 (-0.0806, 0.0869)   | 0.9409 | 0.9986 | 0.0256 (-0.0611, 0.1122)   | 0.5603 | 0.9993 |
| MECPP     | Uracil                      | 0.0063 (-0.1128, 0.1253)   | 0.9173 | 0.9986 | 0.0205 (-0.1047, 0.1456)   | 0.7469 | 0.9993 |
| MECPP     | Uridine                     | 0.0051 (-0.1490, 0.1591)   | 0.9482 | 0.9986 | 0.0096 (-0.1523, 0.1715)   | 0.9067 | 0.9993 |
| MECPP     | Valine                      | 0.0103 (-0.0683, 0.0889)   | 0.7961 | 0.9986 | 0.0304 (-0.0508, 0.1117)   | 0.4597 | 0.9993 |
| MEHHP     | 1,3-Dihydroxyacetone        | 0.0282 (-0.1431, 0.1994)   | 0.7453 | 0.9986 | 0.0110 (-0.1709, 0.1929)   | 0.9047 | 0.9993 |
| MEHHP     | 2-Hydroxybutyrate           | -0.0162 (-0.1005, 0.0681)  | 0.7044 | 0.9986 | -0.0339 (-0.1227, 0.0549)  | 0.4510 | 0.9993 |
| MEHHP     | 3-Hydroxybutyrate           | -0.0785 (-0.2681, 0.1110)  | 0.4137 | 0.9986 | -0.0779 (-0.2748, 0.1189)  | 0.4348 | 0.9993 |
| MEHHP     | 4-Aminobutyrate             | 0.0043 (-0.1021, 0.1107)   | 0.9361 | 0.9986 | 0.0289 (-0.0787, 0.1364)   | 0.5960 | 0.9993 |
| MEHHP     | 4-Hydroxybutyrate           | -0.0028 (-0.2450, 0.2393)  | 0.9815 | 0.9986 | -0.0336 (-0.2909, 0.2237)  | 0.7966 | 0.9993 |
| MEHHP     | Acetate                     | -0.0467 (-0.1944, 0.1009)  | 0.5323 | 0.9986 | -0.0444 (-0.2002, 0.1115)  | 0.5741 | 0.9993 |
| MEHHP     | Alanine                     | 0.0134 (-0.0532, 0.0800)   | 0.6916 | 0.9986 | 0.0299 (-0.0387, 0.0984)   | 0.3899 | 0.9993 |
| MEHHP     | Arginine                    | 0.0002 (-0.0888, 0.0892)   | 0.9961 | 0.9986 | 0.0103 (-0.0836, 0.1043)   | 0.8278 | 0.9993 |
| MEHHP     | Asparagine                  | 0.0083 (-0.0695, 0.0861)   | 0.8327 | 0.9986 | 0.0296 (-0.0505, 0.1098)   | 0.4654 | 0.9993 |
| MEHHP     | Aspartate                   | 0.0010 (-0.0672, 0.0692)   | 0.9768 | 0.9986 | 0.0023 (-0.0693, 0.0740)   | 0.9489 | 0.9993 |
| MEHHP     | Betaine                     | -0.0702 (-0.1466, 0.0061)  | 0.0711 | 0.9986 | -0.0714 (-0.1517, 0.0089)  | 0.0809 | 0.9993 |
| MEHHP     | Carnitine                   | -0.0518 (-0.1186, 0.0151)  | 0.1280 | 0.9986 | -0.0489 (-0.1198, 0.0219)  | 0.1741 | 0.9993 |
| MEHHP     | Choline                     | 0.0064 (-0.0659, 0.0787)   | 0.8606 | 0.9986 | 0.0103 (-0.0662, 0.0867)   | 0.7907 | 0.9993 |
| MEHHP     | Creatine                    | 0.0190 (-0.0385, 0.0765)   | 0.5137 | 0.9986 | 0.0192 (-0.0399, 0.0784)   | 0.5207 | 0.9993 |
| MEHHP     | Cystine                     | 0.1119 (-0.0317, 0.2555)   | 0.1254 | 0.9986 | 0.1245 (-0.0277, 0.2767)   | 0.1079 | 0.9993 |
| MEHHP     | Ethanolamine                | -0.0014 (-0.0767, 0.0739)  | 0.9704 | 0.9986 | 0.0061 (-0.0730, 0.0852)   | 0.8792 | 0.9993 |
| MEHHP     | Formate                     | -0.0196 (-0.1034, 0.0641)  | 0.6434 | 0.9986 | -0.0145 (-0.1009, 0.0720)  | 0.7408 | 0.9993 |
| MEHHP     | Fumarate                    | 0.0098 (-0.0966, 0.1163)   | 0.8552 | 0.9986 | 0.0130 (-0.0997, 0.1257)   | 0.8199 | 0.9993 |
| MEHHP     | Glucitol                    | -0.0554 (-0.1394, 0.0286)  | 0.1945 | 0.9986 | -0.0537 (-0.1422, 0.0349)  | 0.2326 | 0.9993 |
| MEHHP     | Glutamate                   | 0.0033 (-0.0598, 0.0665)   | 0.9168 | 0.9986 | 0.0075 (-0.0586, 0.0737)   | 0.8217 | 0.9993 |
| MEHHP     | Glutamine                   | -0.0110 (-0.0544, 0.0325)  | 0.6180 | 0.9986 | -0.0104 (-0.0545, 0.0337)  | 0.6404 | 0.9993 |
| MEHHP     | Glutathione                 | -0.1297 (-0.2904, 0.0311)  | 0.1129 | 0.9986 | -0.1519 (-0.3188, 0.0149)  | 0.0739 | 0.9993 |
| MEHHP     | Glycerol                    | 0.0294 (-0.0541, 0.1128)   | 0.4878 | 0.9986 | 0.0370 (-0.0512, 0.1252)   | 0.4077 | 0.9993 |
| MEHHP     | Glycine                     | 0.0171 (-0.0514, 0.0856)   | 0.6214 | 0.9986 | 0.0319 (-0.0396, 0.1035)   | 0.3788 | 0.9993 |
| MEHHP     | Hypoxanthine                | -0.0037 (-0.0682, 0.0607)  | 0.9086 | 0.9986 | 0.0072 (-0.0599, 0.0743)   | 0.8317 | 0.9993 |

| Phthalate | Metabolite                  | Total Effect               |        |        | Direct Effect              |        |        |
|-----------|-----------------------------|----------------------------|--------|--------|----------------------------|--------|--------|
|           |                             | Estimate (95% CI)          | p      | FDR p  | Estimate (95% CI)          | p      | FDR p  |
| MEHHP     | Inosine                     | -0.0729 (-0.2231, 0.0773)  | 0.3387 | 0.9986 | -0.1043 (-0.2588, 0.0503)  | 0.1841 | 0.9993 |
| MEHHP     | Isoleucine                  | 0.0158 (-0.0596, 0.0913)   | 0.6787 | 0.9986 | 0.0368 (-0.0414, 0.1150)   | 0.3536 | 0.9993 |
| MEHHP     | Kynurenine                  | -0.0958 (-0.2109, 0.0193)  | 0.1021 | 0.9986 | -0.0853 (-0.2066, 0.0360)  | 0.1666 | 0.9993 |
| MEHHP     | Lactate                     | 0.0158 (-0.0331, 0.0647)   | 0.5231 | 0.9986 | 0.0190 (-0.0325, 0.0705)   | 0.4661 | 0.9993 |
| MEHHP     | Leucine                     | 0.0125 (-0.0657, 0.0908)   | 0.7518 | 0.9986 | 0.0355 (-0.0453, 0.1163)   | 0.3858 | 0.9993 |
| MEHHP     | Lysine                      | 0.0118 (-0.0770, 0.1005)   | 0.7936 | 0.9986 | 0.0405 (-0.0513, 0.1323)   | 0.3843 | 0.9993 |
| MEHHP     | Methionine                  | 0.0422 (-0.0404, 0.1249)   | 0.3138 | 0.9986 | 0.0661 (-0.0186, 0.1508)   | 0.1247 | 0.9993 |
| MEHHP     | myo-Inositol                | 0.0449 (-0.0295, 0.1193)   | 0.2344 | 0.9986 | 0.0350 (-0.0428, 0.1127)   | 0.3750 | 0.9993 |
| MEHHP     | N-Acetylneuraminate         | -0.0492 (-0.1398, 0.0413)  | 0.2837 | 0.9986 | -0.0432 (-0.1390, 0.0526)  | 0.3738 | 0.9993 |
| MEHHP     | NAD+                        | -0.1143 (-0.2850, 0.0564)  | 0.1874 | 0.9986 | -0.1264 (-0.3056, 0.0527)  | 0.1649 | 0.9993 |
| MEHHP     | Niacinamide                 | 0.0809 (-0.2406, 0.4024)   | 0.6193 | 0.9986 | 0.0541 (-0.2827, 0.3909)   | 0.7509 | 0.9993 |
| MEHHP     | O-Acetylcarnitine           | -0.0820 (-0.1601, -0.0039) | 0.0397 | 0.9986 | -0.0771 (-0.1600, 0.0058)  | 0.0682 | 0.9993 |
| MEHHP     | O-Phosphocholine            | -0.2578 (-0.4589, -0.0567) | 0.0124 | 0.9986 | -0.2557 (-0.4695, -0.0420) | 0.0194 | 0.9993 |
| MEHHP     | O-Phosphoethanolamine       | -0.1461 (-0.2917, -0.0005) | 0.0492 | 0.9986 | -0.1405 (-0.2925, 0.0114)  | 0.0696 | 0.9993 |
| MEHHP     | Ornithine                   | 0.0188 (-0.0961, 0.1337)   | 0.7470 | 0.9986 | 0.0349 (-0.0855, 0.1553)   | 0.5673 | 0.9993 |
| MEHHP     | Pantothenate                | 0.0249 (-0.0774, 0.1273)   | 0.6303 | 0.9986 | 0.0290 (-0.0777, 0.1357)   | 0.5913 | 0.9993 |
| MEHHP     | Phenylalanine               | 0.0196 (-0.0596, 0.0989)   | 0.6246 | 0.9986 | 0.0384 (-0.0437, 0.1205)   | 0.3564 | 0.9993 |
| MEHHP     | Proline                     | 0.0420 (-0.0256, 0.1095)   | 0.2209 | 0.9986 | 0.0580 (-0.0123, 0.1282)   | 0.1050 | 0.9993 |
| MEHHP     | Pyroglutamate               | 0.0541 (-0.0394, 0.1475)   | 0.2544 | 0.9986 | 0.0545 (-0.0446, 0.1537)   | 0.2783 | 0.9993 |
| MEHHP     | Serine                      | 0.0273 (-0.0534, 0.1079)   | 0.5051 | 0.9986 | 0.0502 (-0.0329, 0.1334)   | 0.2341 | 0.9993 |
| MEHHP     | sn-Glycero-3-phosphocholine | -0.0597 (-0.1854, 0.0660)  | 0.3489 | 0.9986 | -0.0261 (-0.1538, 0.1016)  | 0.6860 | 0.9993 |
| MEHHP     | Succinate                   | -0.0471 (-0.1894, 0.0951)  | 0.5132 | 0.9986 | -0.0457 (-0.1952, 0.1038)  | 0.5460 | 0.9993 |
| MEHHP     | Taurine                     | -0.0273 (-0.0880, 0.0334)  | 0.3751 | 0.9986 | -0.0235 (-0.0874, 0.0404)  | 0.4675 | 0.9993 |
| MEHHP     | Threonine                   | 0.0251 (-0.0481, 0.0984)   | 0.4985 | 0.9986 | 0.0477 (-0.0272, 0.1227)   | 0.2095 | 0.9993 |
| MEHHP     | Tryptophan                  | 0.0785 (-0.0485, 0.2056)   | 0.2236 | 0.9986 | 0.0962 (-0.0359, 0.2282)   | 0.1521 | 0.9993 |
| MEHHP     | Tyrosine                    | 0.0181 (-0.0563, 0.0924)   | 0.6315 | 0.9986 | 0.0400 (-0.0369, 0.1168)   | 0.3051 | 0.9993 |
| MEHHP     | Uracil                      | 0.0192 (-0.0865, 0.1250)   | 0.7194 | 0.9986 | 0.0297 (-0.0815, 0.1410)   | 0.5974 | 0.9993 |
| MEHHP     | Uridine                     | -0.0039 (-0.1408, 0.1330)  | 0.9553 | 0.9986 | -0.0005 (-0.1444, 0.1434)  | 0.9944 | 0.9998 |
| MEHHP     | Valine                      | 0.0227 (-0.0470, 0.0925)   | 0.5197 | 0.9986 | 0.0427 (-0.0293, 0.1147)   | 0.2428 | 0.9993 |
| MEHP      | 1,3-Dihydroxyacetone        | 0.0260 (-0.1588, 0.2108)   | 0.7811 | 0.9986 | 0.0053 (-0.1872, 0.1978)   | 0.9567 | 0.9993 |
| MEHP      | 2-Hydroxybutyrate           | 0.0042 (-0.0868, 0.0952)   | 0.9272 | 0.9986 | -0.0059 (-0.1001, 0.0883)  | 0.9015 | 0.9993 |
| MEHP      | 3-Hydroxybutyrate           | -0.0483 (-0.2532, 0.1566)  | 0.6416 | 0.9986 | -0.0304 (-0.2392, 0.1784)  | 0.7735 | 0.9993 |
| MEHP      | 4-Aminobutyrate             | -0.0026 (-0.1174, 0.1122)  | 0.9641 | 0.9986 | 0.0133 (-0.1006, 0.1272)   | 0.8172 | 0.9993 |
| MEHP      | 4-Hydroxybutyrate           | -0.0631 (-0.3242, 0.1980)  | 0.6335 | 0.9986 | -0.0809 (-0.3529, 0.1911)  | 0.5568 | 0.9993 |
| MEHP      | Acetate                     | -0.1446 (-0.3022, 0.0130)  | 0.0717 | 0.9986 | -0.1409 (-0.3040, 0.0223)  | 0.0899 | 0.9993 |
| MEHP      | Alanine                     | 0.0027 (-0.0693, 0.0746)   | 0.9413 | 0.9986 | 0.0138 (-0.0589, 0.0866)   | 0.7074 | 0.9993 |
| MEHP      | Arginine                    | -0.0102 (-0.1063, 0.0858)  | 0.8333 | 0.9986 | -0.0023 (-0.1017, 0.0972)  | 0.9642 | 0.9993 |
| MEHP      | Asparagine                  | -0.0084 (-0.0923, 0.0756)  | 0.8442 | 0.9986 | 0.0085 (-0.0764, 0.0935)   | 0.8428 | 0.9993 |
| MEHP      | Aspartate                   | -0.0197 (-0.0932, 0.0538)  | 0.5973 | 0.9986 | -0.0167 (-0.0925, 0.0591)  | 0.6637 | 0.9993 |
| MEHP      | Betaine                     | -0.1159 (-0.1969, -0.0349) | 0.0054 | 0.9986 | -0.1129 (-0.1965, -0.0293) | 0.0085 | 0.9993 |
| MEHP      | Carnitine                   | -0.0759 (-0.1475, -0.0043) | 0.0378 | 0.9986 | -0.0742 (-0.1486, 0.0002)  | 0.0506 | 0.9993 |
| MEHP      | Choline                     | -0.0149 (-0.0929, 0.0631)  | 0.7059 | 0.9986 | -0.0133 (-0.0942, 0.0676)  | 0.7459 | 0.9993 |
| MEHP      | Creatine                    | 0.0032 (-0.0589, 0.0653)   | 0.9187 | 0.9986 | 0.0084 (-0.0542, 0.0711)   | 0.7904 | 0.9993 |
| MEHP      | Cystine                     | 0.1090 (-0.0463, 0.2642)   | 0.1673 | 0.9986 | 0.1173 (-0.0441, 0.2787)   | 0.1528 | 0.9993 |
| MEHP      | Ethanolamine                | -0.0075 (-0.0888, 0.0737)  | 0.8551 | 0.9986 | -0.0075 (-0.0912, 0.0763)  | 0.8603 | 0.9993 |
| MEHP      | Formate                     | -0.0460 (-0.1361, 0.0442)  | 0.3151 | 0.9986 | -0.0405 (-0.1318, 0.0507)  | 0.3808 | 0.9993 |
| MEHP      | Fumarate                    | -0.0191 (-0.1340, 0.0957)  | 0.7422 | 0.9986 | -0.0140 (-0.1333, 0.1053)  | 0.8166 | 0.9993 |
| MEHP      | Glucitol                    | -0.0734 (-0.1638, 0.0170)  | 0.1108 | 0.9986 | -0.0678 (-0.1613, 0.0257)  | 0.1538 | 0.9993 |
| MEHP      | Glutamate                   | -0.0198 (-0.0879, 0.0483)  | 0.5654 | 0.9986 | -0.0146 (-0.0846, 0.0554)  | 0.6804 | 0.9993 |
| MEHP      | Glutamine                   | -0.0287 (-0.0754, 0.0179)  | 0.2253 | 0.9986 | -0.0295 (-0.0759, 0.0169)  | 0.2111 | 0.9993 |
| MEHP      | Glutathione                 | -0.1680 (-0.3407, 0.0048)  | 0.0566 | 0.9986 | -0.1867 (-0.3624, -0.0109) | 0.0376 | 0.9993 |
| MEHP      | Glycerol                    | 0.0165 (-0.0738, 0.1067)   | 0.7188 | 0.9986 | 0.0194 (-0.0741, 0.1129)   | 0.6823 | 0.9993 |
| MEHP      | Glycine                     | -0.0031 (-0.0771, 0.0709)  | 0.9343 | 0.9986 | 0.0110 (-0.0650, 0.0869)   | 0.7750 | 0.9993 |
| MEHP      | Hypoxanthine                | -0.0287 (-0.0981, 0.0408)  | 0.4155 | 0.9986 | -0.0215 (-0.0924, 0.0495)  | 0.5500 | 0.9993 |
| MEHP      | Inosine                     | -0.0808 (-0.2429, 0.0812)  | 0.3254 | 0.9986 | -0.0981 (-0.2619, 0.0657)  | 0.2378 | 0.9993 |
| MEHP      | Isoleucine                  | -0.0034 (-0.0849, 0.0781)  | 0.9341 | 0.9986 | 0.0130 (-0.0700, 0.0960)   | 0.7567 | 0.9993 |
| MEHP      | Kynurenine                  | -0.1063 (-0.2304, 0.0178)  | 0.0926 | 0.9986 | -0.0972 (-0.2254, 0.0310)  | 0.1361 | 0.9993 |
| MEHP      | Lactate                     | 0.0031 (-0.0497, 0.0560)   | 0.9077 | 0.9986 | 0.0037 (-0.0509, 0.0582)   | 0.8945 | 0.9993 |
| MEHP      | Leucine                     | -0.0066 (-0.0911, 0.0778)  | 0.8765 | 0.9986 | 0.0118 (-0.0740, 0.0975)   | 0.7864 | 0.9993 |
| MEHP      | Lysine                      | 0.0083 (-0.0874, 0.1041)   | 0.8635 | 0.9986 | 0.0317 (-0.0656, 0.1290)   | 0.5202 | 0.9993 |



| Phthalate | Metabolite                  | Total Effect               |        |        | Direct Effect              |        |        |
|-----------|-----------------------------|----------------------------|--------|--------|----------------------------|--------|--------|
|           |                             | Estimate (95% CI)          | p      | FDR p  | Estimate (95% CI)          | p      | FDR p  |
| MEHP      | Methionine                  | 0.0251 (-0.0644, 0.1145)   | 0.5803 | 0.9986 | 0.0422 (-0.0480, 0.1324)   | 0.3559 | 0.9993 |
| MEHP      | myo-Inositol                | 0.0490 (-0.0313, 0.1293)   | 0.2296 | 0.9986 | 0.0476 (-0.0345, 0.1298)   | 0.2530 | 0.9993 |
| MEHP      | N-Acetylneuraminate         | -0.0561 (-0.1537, 0.0416)  | 0.2581 | 0.9986 | -0.0482 (-0.1495, 0.0531)  | 0.3483 | 0.9993 |
| MEHP      | NAD+                        | -0.1255 (-0.3096, 0.0587)  | 0.1799 | 0.9986 | -0.1411 (-0.3305, 0.0484)  | 0.1430 | 0.9993 |
| MEHP      | Niacinamide                 | 0.0464 (-0.3008, 0.3936)   | 0.7918 | 0.9986 | 0.0015 (-0.3551, 0.3581)   | 0.9934 | 0.9998 |
| MEHP      | O-Acetylcarnitine           | -0.1047 (-0.1884, -0.0210) | 0.0147 | 0.9986 | -0.1038 (-0.1908, -0.0169) | 0.0197 | 0.9993 |
| MEHP      | O-Phosphocholine            | -0.2174 (-0.4366, 0.0018)  | 0.0519 | 0.9986 | -0.2143 (-0.4424, 0.0139)  | 0.0654 | 0.9993 |
| MEHP      | O-Phosphoethanolamine       | -0.1752 (-0.3318, -0.0186) | 0.0287 | 0.9986 | -0.1571 (-0.3177, 0.0034)  | 0.0549 | 0.9993 |
| MEHP      | Ornithine                   | 0.0091 (-0.1149, 0.1332)   | 0.8842 | 0.9986 | 0.0270 (-0.1005, 0.1544)   | 0.6762 | 0.9993 |
| MEHP      | Pantothenate                | -0.0056 (-0.1161, 0.1050)  | 0.9207 | 0.9986 | -0.0130 (-0.1260, 0.1000)  | 0.8202 | 0.9993 |
| MEHP      | Phenylalanine               | -0.0070 (-0.0926, 0.0787)  | 0.8722 | 0.9986 | 0.0086 (-0.0786, 0.0958)   | 0.8463 | 0.9993 |
| MEHP      | Proline                     | 0.0268 (-0.0464, 0.0999)   | 0.4708 | 0.9986 | 0.0388 (-0.0361, 0.1136)   | 0.3074 | 0.9993 |
| MEHP      | Pyroglutamate               | 0.0080 (-0.0933, 0.1094)   | 0.8758 | 0.9986 | 0.0058 (-0.0997, 0.1112)   | 0.9141 | 0.9993 |
| MEHP      | Serine                      | 0.0118 (-0.0754, 0.0990)   | 0.7896 | 0.9986 | 0.0300 (-0.0583, 0.1183)   | 0.5027 | 0.9993 |
| MEHP      | sn-Glycero-3-phosphocholine | -0.0865 (-0.2218, 0.0488)  | 0.2081 | 0.9986 | -0.0691 (-0.2037, 0.0655)  | 0.3116 | 0.9993 |
| MEHP      | Succinate                   | -0.0387 (-0.1924, 0.1149)  | 0.6186 | 0.9986 | -0.0415 (-0.1997, 0.1167)  | 0.6044 | 0.9993 |
| MEHP      | Taurine                     | -0.0415 (-0.1068, 0.0238)  | 0.2109 | 0.9986 | -0.0380 (-0.1054, 0.0294)  | 0.2664 | 0.9993 |
| MEHP      | Threonine                   | 0.0218 (-0.0573, 0.1010)   | 0.5858 | 0.9986 | 0.0402 (-0.0393, 0.1197)   | 0.3183 | 0.9993 |
| MEHP      | Tryptophan                  | 0.0368 (-0.1010, 0.1746)   | 0.5983 | 0.9986 | 0.0596 (-0.0810, 0.2002)   | 0.4028 | 0.9993 |
| MEHP      | Tyrosine                    | 0.0025 (-0.0778, 0.0828)   | 0.9514 | 0.9986 | 0.0198 (-0.0618, 0.1014)   | 0.6313 | 0.9993 |
| MEHP      | Uracil                      | -0.0129 (-0.1271, 0.1013)  | 0.8232 | 0.9986 | -0.0127 (-0.1305, 0.1051)  | 0.8319 | 0.9993 |
| MEHP      | Uridine                     | -0.0325 (-0.1801, 0.1152)  | 0.6642 | 0.9986 | -0.0217 (-0.1739, 0.1305)  | 0.7781 | 0.9993 |
| MEHP      | Valine                      | 0.0060 (-0.0694, 0.0814)   | 0.8752 | 0.9986 | 0.0226 (-0.0539, 0.0991)   | 0.5593 | 0.9993 |
| MEOHP     | 1,3-Dihydroxyacetone        | 0.0261 (-0.1603, 0.2124)   | 0.7823 | 0.9986 | 0.0063 (-0.1920, 0.2046)   | 0.9500 | 0.9993 |
| MEOHP     | 2-Hydroxybutyrate           | -0.0231 (-0.1148, 0.0686)  | 0.6191 | 0.9986 | -0.0437 (-0.1404, 0.0530)  | 0.3726 | 0.9993 |
| MEOHP     | 3-Hydroxybutyrate           | -0.0695 (-0.2759, 0.1369)  | 0.5066 | 0.9986 | -0.0640 (-0.2788, 0.1508)  | 0.5561 | 0.9993 |
| MEOHP     | 4-Aminobutyrate             | 0.0011 (-0.1147, 0.1168)   | 0.9854 | 0.9986 | 0.0253 (-0.0920, 0.1425)   | 0.6703 | 0.9993 |
| MEOHP     | 4-Hydroxybutyrate           | 0.0153 (-0.2482, 0.2788)   | 0.9087 | 0.9986 | -0.0165 (-0.2971, 0.2640)  | 0.9073 | 0.9993 |
| MEOHP     | Acetate                     | -0.0511 (-0.2118, 0.1095)  | 0.5301 | 0.9986 | -0.0506 (-0.2204, 0.1192)  | 0.5562 | 0.9993 |
| MEOHP     | Alanine                     | 0.0044 (-0.0681, 0.0770)   | 0.9036 | 0.9986 | 0.0205 (-0.0544, 0.0954)   | 0.5886 | 0.9993 |
| MEOHP     | Arginine                    | -0.0058 (-0.1026, 0.0910)  | 0.9055 | 0.9986 | 0.0048 (-0.0976, 0.1073)   | 0.9255 | 0.9993 |
| MEOHP     | Asparagine                  | -0.0001 (-0.0847, 0.0846)  | 0.9986 | 0.9986 | 0.0232 (-0.0643, 0.1106)   | 0.6008 | 0.9993 |
| MEOHP     | Aspartate                   | -0.0033 (-0.0775, 0.0709)  | 0.9302 | 0.9986 | -0.0008 (-0.0789, 0.0773)  | 0.9837 | 0.9996 |
| MEOHP     | Betaine                     | -0.0855 (-0.1684, -0.0027) | 0.0431 | 0.9986 | -0.0869 (-0.1742, 0.0003)  | 0.0508 | 0.9993 |
| MEOHP     | Carnitine                   | -0.0623 (-0.1349, 0.0103)  | 0.0919 | 0.9986 | -0.0595 (-0.1366, 0.0176)  | 0.1292 | 0.9993 |
| MEOHP     | Choline                     | -0.0012 (-0.0798, 0.0775)  | 0.9769 | 0.9986 | 0.0010 (-0.0824, 0.0844)   | 0.9808 | 0.9993 |
| MEOHP     | Creatine                    | 0.0065 (-0.0561, 0.0691)   | 0.8377 | 0.9986 | 0.0053 (-0.0592, 0.0699)   | 0.8705 | 0.9993 |
| MEOHP     | Cystine                     | 0.1203 (-0.0359, 0.2766)   | 0.1301 | 0.9986 | 0.1331 (-0.0329, 0.2991)   | 0.1150 | 0.9993 |
| MEOHP     | Ethanolamine                | -0.0092 (-0.0912, 0.0727)  | 0.8239 | 0.9986 | -0.0021 (-0.0883, 0.0842)  | 0.9621 | 0.9993 |
| MEOHP     | Formate                     | -0.0172 (-0.1084, 0.0740)  | 0.7100 | 0.9986 | -0.0132 (-0.1075, 0.0811)  | 0.7821 | 0.9993 |
| MEOHP     | Fumarate                    | -0.0068 (-0.1226, 0.1090)  | 0.9081 | 0.9986 | -0.0031 (-0.1260, 0.1198)  | 0.9607 | 0.9993 |
| MEOHP     | Glucitol                    | -0.0637 (-0.1551, 0.0276)  | 0.1699 | 0.9986 | -0.0629 (-0.1593, 0.0336)  | 0.1993 | 0.9993 |
| MEOHP     | Glutamate                   | -0.0006 (-0.0693, 0.0682)  | 0.9871 | 0.9986 | 0.0040 (-0.0681, 0.0761)   | 0.9124 | 0.9993 |
| MEOHP     | Glutamine                   | -0.0153 (-0.0626, 0.0319)  | 0.5217 | 0.9986 | -0.0136 (-0.0617, 0.0345)  | 0.5761 | 0.9993 |
| MEOHP     | Glutathione                 | -0.1452 (-0.3201, 0.0296)  | 0.1026 | 0.9986 | -0.1685 (-0.3503, 0.0133)  | 0.0690 | 0.9993 |
| MEOHP     | Glycerol                    | 0.0265 (-0.0643, 0.1174)   | 0.5643 | 0.9986 | 0.0329 (-0.0633, 0.1291)   | 0.4992 | 0.9993 |
| MEOHP     | Glycine                     | 0.0173 (-0.0572, 0.0919)   | 0.6466 | 0.9986 | 0.0332 (-0.0448, 0.1112)   | 0.4009 | 0.9993 |
| MEOHP     | Hypoxanthine                | -0.0055 (-0.0757, 0.0646)  | 0.8763 | 0.9986 | 0.0059 (-0.0672, 0.0791)   | 0.8725 | 0.9993 |
| MEOHP     | Inosine                     | -0.0926 (-0.2558, 0.0706)  | 0.2635 | 0.9986 | -0.1236 (-0.2918, 0.0446)  | 0.1483 | 0.9993 |
| MEOHP     | Isoleucine                  | 0.0102 (-0.0720, 0.0924)   | 0.8065 | 0.9986 | 0.0316 (-0.0537, 0.1169)   | 0.4650 | 0.9993 |
| MEOHP     | Kynurenine                  | -0.1070 (-0.2322, 0.0181)  | 0.0931 | 0.9986 | -0.0945 (-0.2267, 0.0377)  | 0.1597 | 0.9993 |
| MEOHP     | Lactate                     | 0.0137 (-0.0395, 0.0670)   | 0.6103 | 0.9986 | 0.0166 (-0.0395, 0.0727)   | 0.5591 | 0.9993 |
| MEOHP     | Leucine                     | 0.0070 (-0.0782, 0.0921)   | 0.8715 | 0.9986 | 0.0306 (-0.0576, 0.1188)   | 0.4928 | 0.9993 |
| MEOHP     | Lysine                      | 0.0031 (-0.0935, 0.0996)   | 0.9502 | 0.9986 | 0.0327 (-0.0675, 0.1329)   | 0.5194 | 0.9993 |
| MEOHP     | Methionine                  | 0.0390 (-0.0510, 0.1291)   | 0.3926 | 0.9986 | 0.0633 (-0.0292, 0.1559)   | 0.1780 | 0.9993 |
| MEOHP     | myo-Inositol                | 0.0362 (-0.0450, 0.1173)   | 0.3795 | 0.9986 | 0.0258 (-0.0591, 0.1108)   | 0.5479 | 0.9993 |
| MEOHP     | N-Acetylneuraminate         | -0.0528 (-0.1514, 0.0457)  | 0.2906 | 0.9986 | -0.0468 (-0.1512, 0.0576)  | 0.3768 | 0.9993 |
| MEOHP     | NAD+                        | -0.1426 (-0.3279, 0.0427)  | 0.1303 | 0.9986 | -0.1553 (-0.3502, 0.0396)  | 0.1173 | 0.9993 |
| MEOHP     | Niacinamide                 | 0.1012 (-0.2485, 0.4509)   | 0.5679 | 0.9986 | 0.0749 (-0.2922, 0.4419)   | 0.6870 | 0.9993 |
| MEOHP     | O-Acetylcarnitine           | -0.0933 (-0.1781, -0.0084) | 0.0315 | 0.9986 | -0.0877 (-0.1780, 0.0025)  | 0.0567 | 0.9993 |

| Phthalate | Metabolite                  | Total Effect               |        |        | Direct Effect              |        |        |
|-----------|-----------------------------|----------------------------|--------|--------|----------------------------|--------|--------|
|           |                             | Estimate (95% CI)          | p      | FDR p  | Estimate (95% CI)          | p      | FDR p  |
| MEOHP     | O-Phosphocholine            | -0.2913 (-0.5097, -0.0729) | 0.0093 | 0.9986 | -0.2890 (-0.5216, -0.0564) | 0.0153 | 0.9993 |
| MEOHP     | O-Phosphoethanolamine       | -0.1680 (-0.3261, -0.0098) | 0.0376 | 0.9986 | -0.1595 (-0.3249, 0.0059)  | 0.0587 | 0.9993 |
| MEOHP     | Ornithine                   | 0.0102 (-0.1148, 0.1353)   | 0.8719 | 0.9986 | 0.0252 (-0.1061, 0.1565)   | 0.7046 | 0.9993 |
| MEOHP     | Pantothenate                | 0.0210 (-0.0903, 0.1324)   | 0.7092 | 0.9986 | 0.0249 (-0.0914, 0.1413)   | 0.6722 | 0.9993 |
| MEOHP     | Phenylalanine               | 0.0182 (-0.0681, 0.1044)   | 0.6777 | 0.9986 | 0.0374 (-0.0522, 0.1269)   | 0.4104 | 0.9993 |
| MEOHP     | Proline                     | 0.0384 (-0.0352, 0.1120)   | 0.3040 | 0.9986 | 0.0545 (-0.0223, 0.1313)   | 0.1624 | 0.9993 |
| MEOHP     | Pyroglutamate               | 0.0544 (-0.0474, 0.1561)   | 0.2923 | 0.9986 | 0.0533 (-0.0549, 0.1615)   | 0.3311 | 0.9993 |
| MEOHP     | Serine                      | 0.0240 (-0.0638, 0.1119)   | 0.5896 | 0.9986 | 0.0484 (-0.0424, 0.1391)   | 0.2934 | 0.9993 |
| MEOHP     | sn-Glycero-3-phosphocholine | -0.0943 (-0.2306, 0.0419)  | 0.1730 | 0.9986 | -0.0615 (-0.2003, 0.0773)  | 0.3823 | 0.9993 |
| MEOHP     | Succinate                   | -0.0509 (-0.2057, 0.1039)  | 0.5165 | 0.9986 | -0.0498 (-0.2127, 0.1131)  | 0.5461 | 0.9993 |
| MEOHP     | Taurine                     | -0.0336 (-0.0996, 0.0324)  | 0.3156 | 0.9986 | -0.0293 (-0.0988, 0.0403)  | 0.4067 | 0.9993 |
| MEOHP     | Threonine                   | 0.0216 (-0.0581, 0.1014)   | 0.5924 | 0.9986 | 0.0457 (-0.0361, 0.1275)   | 0.2704 | 0.9993 |
| MEOHP     | Tryptophan                  | 0.0894 (-0.0488, 0.2276)   | 0.2028 | 0.9986 | 0.1081 (-0.0358, 0.2520)   | 0.1394 | 0.9993 |
| MEOHP     | Tyrosine                    | 0.0117 (-0.0692, 0.0926)   | 0.7750 | 0.9986 | 0.0347 (-0.0491, 0.1186)   | 0.4140 | 0.9993 |
| MEOHP     | Uracil                      | 0.0252 (-0.0898, 0.1403)   | 0.6653 | 0.9986 | 0.0348 (-0.0864, 0.1560)   | 0.5713 | 0.9993 |
| MEOHP     | Uridine                     | -0.0133 (-0.1623, 0.1356)  | 0.8597 | 0.9986 | -0.0083 (-0.1651, 0.1486)  | 0.9169 | 0.9993 |
| MEOHP     | Valine                      | 0.0175 (-0.0585, 0.0934)   | 0.6500 | 0.9986 | 0.0379 (-0.0408, 0.1165)   | 0.3424 | 0.9993 |
| MEP       | 1,3-Dihydroxyacetone        | 0.0255 (-0.1139, 0.1649)   | 0.7178 | 0.9986 | 0.0190 (-0.1286, 0.1667)   | 0.7989 | 0.9993 |
| MEP       | 2-Hydroxybutyrate           | -0.0372 (-0.1056, 0.0311)  | 0.2833 | 0.9986 | -0.0389 (-0.1108, 0.0330)  | 0.2861 | 0.9993 |
| MEP       | 3-Hydroxybutyrate           | -0.0540 (-0.2084, 0.1005)  | 0.4905 | 0.9986 | -0.0498 (-0.2097, 0.1102)  | 0.5392 | 0.9993 |
| MEP       | 4-Aminobutyrate             | 0.0693 (-0.0165, 0.1551)   | 0.1123 | 0.9986 | 0.0774 (-0.0089, 0.1636)   | 0.0784 | 0.9993 |
| MEP       | 4-Hydroxybutyrate           | 0.0378 (-0.1592, 0.2349)   | 0.7047 | 0.9986 | 0.0498 (-0.1590, 0.2586)   | 0.6375 | 0.9993 |
| MEP       | Acetate                     | 0.0495 (-0.0706, 0.1696)   | 0.4166 | 0.9986 | 0.0508 (-0.0755, 0.1771)   | 0.4275 | 0.9993 |
| MEP       | Alanine                     | -0.0063 (-0.0606, 0.0480)  | 0.8183 | 0.9986 | -0.0101 (-0.0659, 0.0457)  | 0.7211 | 0.9993 |
| MEP       | Arginine                    | -0.0226 (-0.0949, 0.0497)  | 0.5375 | 0.9986 | -0.0260 (-0.1021, 0.0501)  | 0.5004 | 0.9993 |
| MEP       | Asparagine                  | -0.0088 (-0.0722, 0.0545)  | 0.7829 | 0.9986 | -0.0082 (-0.0733, 0.0570)  | 0.8047 | 0.9993 |
| MEP       | Aspartate                   | -0.0211 (-0.0765, 0.0343)  | 0.4519 | 0.9986 | -0.0181 (-0.0761, 0.0400)  | 0.5392 | 0.9993 |
| MEP       | Betaine                     | -0.0069 (-0.0699, 0.0561)  | 0.8277 | 0.9986 | 0.0054 (-0.0606, 0.0714)   | 0.8709 | 0.9993 |
| MEP       | Carnitine                   | -0.0201 (-0.0749, 0.0347)  | 0.4695 | 0.9986 | -0.0162 (-0.0741, 0.0417)  | 0.5813 | 0.9993 |
| MEP       | Choline                     | 0.0206 (-0.0382, 0.0793)   | 0.4892 | 0.9986 | 0.0151 (-0.0469, 0.0771)   | 0.6303 | 0.9993 |
| MEP       | Creatine                    | -0.0248 (-0.0715, 0.0219)  | 0.2950 | 0.9986 | -0.0148 (-0.0628, 0.0332)  | 0.5423 | 0.9993 |
| MEP       | Cystine                     | 0.0480 (-0.0697, 0.1657)   | 0.4208 | 0.9986 | 0.0472 (-0.0774, 0.1718)   | 0.4550 | 0.9993 |
| MEP       | Ethanolamine                | 0.0251 (-0.0360, 0.0863)   | 0.4173 | 0.9986 | 0.0221 (-0.0420, 0.0862)   | 0.4967 | 0.9993 |
| MEP       | Formate                     | -0.0154 (-0.0836, 0.0529)  | 0.6569 | 0.9986 | -0.0226 (-0.0927, 0.0475)  | 0.5249 | 0.9993 |
| MEP       | Formate                     | -0.0021 (-0.0888, 0.0846)  | 0.9620 | 0.9986 | 0.0093 (-0.0823, 0.1008)   | 0.8415 | 0.9993 |
| MEP       | Glucitol                    | -0.0542 (-0.1224, 0.0141)  | 0.1188 | 0.9986 | -0.0592 (-0.1307, 0.0124)  | 0.1041 | 0.9993 |
| MEP       | Glutamate                   | -0.0035 (-0.0550, 0.0479)  | 0.8917 | 0.9986 | -0.0011 (-0.0548, 0.0527)  | 0.9690 | 0.9993 |
| MEP       | Glutamine                   | -0.0068 (-0.0421, 0.0286)  | 0.7061 | 0.9986 | 0.0007 (-0.0351, 0.0366)   | 0.9671 | 0.9993 |
| MEP       | Glutathione                 | -0.0898 (-0.2211, 0.0414)  | 0.1781 | 0.9986 | -0.0918 (-0.2281, 0.0444)  | 0.1846 | 0.9993 |
| MEP       | Glycerol                    | 0.0303 (-0.0375, 0.0982)   | 0.3781 | 0.9986 | 0.0214 (-0.0502, 0.0931)   | 0.5549 | 0.9993 |
| MEP       | Glycine                     | 0.0168 (-0.0390, 0.0725)   | 0.5531 | 0.9986 | 0.0204 (-0.0378, 0.0786)   | 0.4890 | 0.9993 |
| MEP       | Hypoxanthine                | 0.0078 (-0.0446, 0.0603)   | 0.7677 | 0.9986 | 0.0074 (-0.0470, 0.0619)   | 0.7875 | 0.9993 |
| MEP       | Inosine                     | -0.1354 (-0.2558, -0.0150) | 0.0278 | 0.9986 | -0.1208 (-0.2453, 0.0037)  | 0.0570 | 0.9993 |
| MEP       | Isoleucine                  | 0.0139 (-0.0476, 0.0753)   | 0.6554 | 0.9986 | 0.0106 (-0.0531, 0.0742)   | 0.7433 | 0.9993 |
| MEP       | Kynurenine                  | 0.0406 (-0.0538, 0.1351)   | 0.3963 | 0.9986 | 0.0480 (-0.0509, 0.1469)   | 0.3388 | 0.9993 |
| MEP       | Lactate                     | 0.0004 (-0.0395, 0.0403)   | 0.9839 | 0.9986 | 0.0010 (-0.0409, 0.0429)   | 0.9625 | 0.9993 |
| MEP       | Leucine                     | 0.0137 (-0.0500, 0.0774)   | 0.6704 | 0.9986 | 0.0109 (-0.0549, 0.0767)   | 0.7434 | 0.9993 |
| MEP       | Lysine                      | 0.0026 (-0.0697, 0.0748)   | 0.9438 | 0.9986 | -0.0021 (-0.0769, 0.0726)  | 0.9547 | 0.9993 |
| MEP       | Methionine                  | 0.0386 (-0.0286, 0.1058)   | 0.2582 | 0.9986 | 0.0303 (-0.0389, 0.0995)   | 0.3878 | 0.9993 |
| MEP       | myo-Inositol                | 0.0019 (-0.0590, 0.0628)   | 0.9507 | 0.9986 | 0.0111 (-0.0522, 0.0744)   | 0.7286 | 0.9993 |
| MEP       | N-Acetylneuraminat          | -0.0166 (-0.0906, 0.0573)  | 0.6569 | 0.9986 | -0.0229 (-0.1008, 0.0550)  | 0.5612 | 0.9993 |
| MEP       | NAD+                        | -0.1048 (-0.2435, 0.0339)  | 0.1374 | 0.9986 | -0.1031 (-0.2486, 0.0423)  | 0.1630 | 0.9993 |
| MEP       | Niacinamide                 | -0.0131 (-0.2751, 0.2489)  | 0.9213 | 0.9986 | -0.0305 (-0.3040, 0.2430)  | 0.8254 | 0.9993 |
| MEP       | O-Acetylcarnitine           | -0.0218 (-0.0863, 0.0428)  | 0.5058 | 0.9986 | -0.0237 (-0.0918, 0.0445)  | 0.4931 | 0.9993 |
| MEP       | O-Phosphocholine            | -0.1065 (-0.2733, 0.0604)  | 0.2089 | 0.9986 | -0.0994 (-0.2760, 0.0772)  | 0.2673 | 0.9993 |
| MEP       | O-Phosphoethanolamine       | -0.0999 (-0.2190, 0.0193)  | 0.0996 | 0.9986 | -0.0862 (-0.2103, 0.0379)  | 0.1715 | 0.9993 |
| MEP       | Ornithine                   | 0.0260 (-0.0675, 0.1195)   | 0.5828 | 0.9986 | 0.0257 (-0.0721, 0.1235)   | 0.6037 | 0.9993 |
| MEP       | Pantothenate                | 0.0222 (-0.0611, 0.1055)   | 0.5982 | 0.9986 | 0.0254 (-0.0612, 0.1120)   | 0.5623 | 0.9993 |
| MEP       | Phenylalanine               | 0.0091 (-0.0555, 0.0737)   | 0.7812 | 0.9986 | 0.0045 (-0.0624, 0.0714)   | 0.8949 | 0.9993 |
| MEP       | Proline                     | 0.0179 (-0.0373, 0.0732)   | 0.5222 | 0.9986 | 0.0167 (-0.0409, 0.0743)   | 0.5678 | 0.9993 |

| Phthalate | Metabolite                  | Total Effect              |        |        | Direct Effect             |        |        |
|-----------|-----------------------------|---------------------------|--------|--------|---------------------------|--------|--------|
|           |                             | Estimate (95% CI)         | p      | FDR p  | Estimate (95% CI)         | p      | FDR p  |
| MEP       | Pyroglutamate               | -0.0015 (-0.0780, 0.0749) | 0.9682 | 0.9986 | -0.0051 (-0.0860, 0.0758) | 0.9013 | 0.9993 |
| MEP       | Serine                      | 0.0219 (-0.0438, 0.0876)  | 0.5109 | 0.9986 | 0.0194 (-0.0484, 0.0872)  | 0.5720 | 0.9993 |
| MEP       | sn-Glycero-3-phosphocholine | -0.0142 (-0.1168, 0.0885) | 0.7855 | 0.9986 | -0.0319 (-0.1355, 0.0717) | 0.5430 | 0.9993 |
| MEP       | Succinate                   | -0.0334 (-0.1492, 0.0825) | 0.5697 | 0.9986 | -0.0395 (-0.1608, 0.0818) | 0.5200 | 0.9993 |
| MEP       | Taurine                     | -0.0268 (-0.0762, 0.0225) | 0.2839 | 0.9986 | -0.0230 (-0.0748, 0.0288) | 0.3812 | 0.9993 |
| MEP       | Threonine                   | 0.0028 (-0.0570, 0.0625)  | 0.9273 | 0.9986 | -0.0015 (-0.0627, 0.0597) | 0.9617 | 0.9993 |
| MEP       | Tryptophan                  | 0.0118 (-0.0922, 0.1159)  | 0.8225 | 0.9986 | 0.0198 (-0.0883, 0.1279)  | 0.7170 | 0.9993 |
| MEP       | Tyrosine                    | 0.0277 (-0.0327, 0.0881)  | 0.3655 | 0.9986 | 0.0271 (-0.0354, 0.0895)  | 0.3925 | 0.9993 |
| MEP       | Uracil                      | 0.0454 (-0.0404, 0.1312)  | 0.2970 | 0.9986 | 0.0283 (-0.0620, 0.1185)  | 0.5363 | 0.9993 |
| MEP       | Uridine                     | -0.0079 (-0.1193, 0.1036) | 0.8891 | 0.9986 | 0.0023 (-0.1145, 0.1191)  | 0.9685 | 0.9993 |
| MEP       | Valine                      | 0.0106 (-0.0462, 0.0675)  | 0.7117 | 0.9986 | 0.0088 (-0.0500, 0.0675)  | 0.7677 | 0.9993 |
| MHBP      | 1,3-Dihydroxyacetone        | -0.1401 (-0.5541, 0.2739) | 0.5043 | 0.9986 | -0.1333 (-0.5609, 0.2944) | 0.5384 | 0.9993 |
| MHBP      | 2-Hydroxybutyrate           | -0.0993 (-0.3028, 0.1042) | 0.3359 | 0.9986 | -0.0938 (-0.3027, 0.1150) | 0.3755 | 0.9993 |
| MHBP      | 3-Hydroxybutyrate           | 0.2759 (-0.1816, 0.7334)  | 0.2350 | 0.9986 | 0.2178 (-0.2452, 0.6808)  | 0.3535 | 0.9993 |
| MHBP      | 4-Aminobutyrate             | 0.0272 (-0.2303, 0.2847)  | 0.8348 | 0.9986 | 0.0853 (-0.1677, 0.3383)  | 0.5059 | 0.9993 |
| MHBP      | 4-Hydroxybutyrate           | 0.2253 (-0.3595, 0.8102)  | 0.4472 | 0.9986 | 0.2192 (-0.3855, 0.8240)  | 0.4743 | 0.9993 |
| MHBP      | Acetate                     | -0.1527 (-0.5097, 0.2044) | 0.3991 | 0.9986 | -0.1359 (-0.5024, 0.2306) | 0.4644 | 0.9993 |
| MHBP      | Alanine                     | -0.0402 (-0.2015, 0.1211) | 0.6225 | 0.9986 | -0.0206 (-0.1825, 0.1413) | 0.8013 | 0.9993 |
| MHBP      | Arginine                    | -0.0291 (-0.2445, 0.1862) | 0.7893 | 0.9986 | -0.0322 (-0.2534, 0.1889) | 0.7733 | 0.9993 |
| MHBP      | Asparagine                  | -0.0002 (-0.1885, 0.1882) | 0.9985 | 0.9986 | -0.0009 (-0.1900, 0.1882) | 0.9927 | 0.9998 |
| MHBP      | Aspartate                   | -0.0212 (-0.1863, 0.1438) | 0.7994 | 0.9986 | -0.0366 (-0.2052, 0.1320) | 0.6680 | 0.9993 |
| MHBP      | Betaine                     | -0.0123 (-0.1996, 0.1750) | 0.8967 | 0.9986 | -0.0050 (-0.1964, 0.1865) | 0.9589 | 0.9993 |
| MHBP      | Carnitine                   | 0.0107 (-0.1526, 0.1741)  | 0.8966 | 0.9986 | 0.0243 (-0.1438, 0.1924)  | 0.7751 | 0.9993 |
| MHBP      | Choline                     | 0.0063 (-0.1687, 0.1814)  | 0.9430 | 0.9986 | 0.0119 (-0.1681, 0.1920)  | 0.8957 | 0.9993 |
| MHBP      | Creatine                    | -0.1062 (-0.2443, 0.0319) | 0.1306 | 0.9986 | -0.0966 (-0.2349, 0.0418) | 0.1694 | 0.9993 |
| MHBP      | Cystine                     | 0.1003 (-0.2502, 0.4508)  | 0.5722 | 0.9986 | 0.1035 (-0.2582, 0.4653)  | 0.5721 | 0.9993 |
| MHBP      | Ethanolamine                | -0.0187 (-0.2010, 0.1636) | 0.8394 | 0.9986 | -0.0036 (-0.1899, 0.1827) | 0.9695 | 0.9993 |
| MHBP      | Formate                     | -0.1370 (-0.3386, 0.0646) | 0.1811 | 0.9986 | -0.1233 (-0.3258, 0.0791) | 0.2300 | 0.9993 |
| MHBP      | Fumarate                    | 0.0099 (-0.2478, 0.2675)  | 0.9398 | 0.9986 | -0.0048 (-0.2702, 0.2607) | 0.9718 | 0.9993 |
| MHBP      | Glucitol                    | -0.0831 (-0.2875, 0.1212) | 0.4223 | 0.9986 | -0.0816 (-0.2909, 0.1276) | 0.4414 | 0.9993 |
| MHBP      | Glutamate                   | 0.0292 (-0.1237, 0.1820)  | 0.7064 | 0.9986 | 0.0325 (-0.1232, 0.1882)  | 0.6803 | 0.9993 |
| MHBP      | Glutamine                   | -0.0020 (-0.1073, 0.1032) | 0.9698 | 0.9986 | 0.0060 (-0.0980, 0.1099)  | 0.9093 | 0.9993 |
| MHBP      | Glutathione                 | -0.0073 (-0.4004, 0.3858) | 0.9707 | 0.9986 | 0.0117 (-0.3865, 0.4099)  | 0.9537 | 0.9993 |
| MHBP      | Glycerol                    | 0.0303 (-0.1721, 0.2327)  | 0.7676 | 0.9986 | 0.0357 (-0.1724, 0.2437)  | 0.7350 | 0.9993 |
| MHBP      | Glycine                     | 0.0286 (-0.1373, 0.1946)  | 0.7334 | 0.9986 | 0.0325 (-0.1364, 0.2015)  | 0.7037 | 0.9993 |
| MHBP      | Hypoxanthine                | -0.0305 (-0.1865, 0.1255) | 0.6996 | 0.9986 | -0.0170 (-0.1750, 0.1411) | 0.8320 | 0.9993 |
| MHBP      | Inosine                     | -0.0453 (-0.4102, 0.3196) | 0.8063 | 0.9986 | -0.0610 (-0.4274, 0.3053) | 0.7421 | 0.9993 |
| MHBP      | Isoleucine                  | -0.0027 (-0.1856, 0.1802) | 0.9765 | 0.9986 | 0.0024 (-0.1824, 0.1871)  | 0.9797 | 0.9993 |
| MHBP      | Kynurenine                  | -0.0492 (-0.3307, 0.2323) | 0.7302 | 0.9986 | -0.0520 (-0.3397, 0.2358) | 0.7212 | 0.9993 |
| MHBP      | Lactate                     | 0.0450 (-0.0732, 0.1633)  | 0.4525 | 0.9986 | 0.0613 (-0.0596, 0.1822)  | 0.3178 | 0.9993 |
| MHBP      | Leucine                     | 0.0019 (-0.1876, 0.1914)  | 0.9843 | 0.9986 | 0.0079 (-0.1830, 0.1988)  | 0.9348 | 0.9993 |
| MHBP      | Lysine                      | -0.0301 (-0.2448, 0.1847) | 0.7822 | 0.9986 | -0.0315 (-0.2482, 0.1853) | 0.7743 | 0.9993 |
| MHBP      | Methionine                  | 0.0203 (-0.1806, 0.2212)  | 0.8421 | 0.9986 | 0.0220 (-0.1793, 0.2234)  | 0.8289 | 0.9993 |
| MHBP      | myo-Inositol                | 0.0229 (-0.1582, 0.2040)  | 0.8028 | 0.9986 | 0.0040 (-0.1797, 0.1877)  | 0.9659 | 0.9993 |
| MHBP      | N-Acetylneuraminate         | -0.0053 (-0.2255, 0.2149) | 0.9622 | 0.9986 | -0.0120 (-0.2383, 0.2142) | 0.9163 | 0.9993 |
| MHBP      | NAD+                        | -0.1335 (-0.5489, 0.2819) | 0.5260 | 0.9986 | -0.1106 (-0.5355, 0.3142) | 0.6071 | 0.9993 |
| MHBP      | Niacinamide                 | 0.3201 (-0.4569, 1.0971)  | 0.4165 | 0.9986 | 0.3069 (-0.4846, 1.0983)  | 0.4442 | 0.9993 |
| MHBP      | O-Acetylcarnitine           | 0.0599 (-0.1321, 0.2519)  | 0.5380 | 0.9986 | 0.0634 (-0.1342, 0.2610)  | 0.5262 | 0.9993 |
| MHBP      | O-Phosphocholine            | -0.0859 (-0.5849, 0.4131) | 0.7339 | 0.9986 | -0.0520 (-0.5667, 0.4628) | 0.8420 | 0.9993 |
| MHBP      | O-Phosphoethanolamine       | 0.0808 (-0.2770, 0.4385)  | 0.6558 | 0.9986 | 0.0519 (-0.3107, 0.4144)  | 0.7775 | 0.9993 |
| MHBP      | Ornithine                   | -0.0495 (-0.3277, 0.2286) | 0.7251 | 0.9986 | -0.0533 (-0.3370, 0.2304) | 0.7105 | 0.9993 |
| MHBP      | Pantothenate                | -0.1233 (-0.3703, 0.1237) | 0.3252 | 0.9986 | -0.1065 (-0.3573, 0.1443) | 0.4021 | 0.9993 |
| MHBP      | Phenylalanine               | 0.0163 (-0.1758, 0.2084)  | 0.8667 | 0.9986 | 0.0202 (-0.1738, 0.2142)  | 0.8371 | 0.9993 |
| MHBP      | Proline                     | -0.0057 (-0.1702, 0.1588) | 0.9453 | 0.9986 | 0.0035 (-0.1638, 0.1708)  | 0.9671 | 0.9993 |
| MHBP      | Pyroglutamate               | -0.1634 (-0.3889, 0.0622) | 0.1543 | 0.9986 | -0.1601 (-0.3929, 0.0728) | 0.1761 | 0.9993 |
| MHBP      | Serine                      | 0.0075 (-0.1881, 0.2032)  | 0.9393 | 0.9986 | 0.0069 (-0.1900, 0.2038)  | 0.9448 | 0.9993 |
| MHBP      | sn-Glycero-3-phosphocholine | -0.1239 (-0.4284, 0.1807) | 0.4225 | 0.9986 | -0.1098 (-0.4100, 0.1904) | 0.4705 | 0.9993 |
| MHBP      | Succinate                   | 0.0343 (-0.3106, 0.3792)  | 0.8443 | 0.9986 | 0.0683 (-0.2840, 0.4205)  | 0.7019 | 0.9993 |
| MHBP      | Taurine                     | 0.0230 (-0.1243, 0.1703)  | 0.7580 | 0.9986 | 0.0354 (-0.1152, 0.1859)  | 0.6428 | 0.9993 |

| Phthalate | Metabolite                  | Total Effect               |        |        | Direct Effect             |        |        |
|-----------|-----------------------------|----------------------------|--------|--------|---------------------------|--------|--------|
|           |                             | Estimate (95% CI)          | p      | FDR p  | Estimate (95% CI)         | p      | FDR p  |
| MHBP      | Threonine                   | 0.0440 (-0.1335, 0.2216)   | 0.6243 | 0.9986 | 0.0422 (-0.1352, 0.2197)  | 0.6382 | 0.9993 |
| MHBP      | Tryptophan                  | -0.0031 (-0.3126, 0.3064)  | 0.9840 | 0.9986 | 0.0007 (-0.3130, 0.3143)  | 0.9967 | 0.9998 |
| MHBP      | Tyrosine                    | 0.0183 (-0.1618, 0.1984)   | 0.8410 | 0.9986 | 0.0195 (-0.1621, 0.2011)  | 0.8321 | 0.9993 |
| MHBP      | Uracil                      | 0.0374 (-0.2187, 0.2935)   | 0.7730 | 0.9986 | 0.0411 (-0.2209, 0.3032)  | 0.7565 | 0.9993 |
| MHBP      | Uridine                     | 0.0169 (-0.3145, 0.3483)   | 0.9198 | 0.9986 | -0.0041 (-0.3429, 0.3347) | 0.9808 | 0.9993 |
| MHBP      | Valine                      | -0.0063 (-0.1755, 0.1628)  | 0.9409 | 0.9986 | -0.0018 (-0.1723, 0.1686) | 0.9831 | 0.9996 |
| MHiBP     | 1,3-Dihydroxyacetone        | -0.1610 (-0.4575, 0.1354)  | 0.2844 | 0.9986 | -0.1955 (-0.5048, 0.1138) | 0.2132 | 0.9993 |
| MHiBP     | 2-Hydroxybutyrate           | -0.0439 (-0.1903, 0.1026)  | 0.5543 | 0.9986 | -0.0657 (-0.2176, 0.0861) | 0.3931 | 0.9993 |
| MHiBP     | 3-Hydroxybutyrate           | 0.0612 (-0.2690, 0.3914)   | 0.7145 | 0.9986 | 0.0983 (-0.2390, 0.4355)  | 0.5652 | 0.9993 |
| MHiBP     | 4-Aminobutyrate             | 0.0728 (-0.1117, 0.2573)   | 0.4362 | 0.9986 | 0.0738 (-0.1100, 0.2575)  | 0.4284 | 0.9993 |
| MHiBP     | 4-Hydroxybutyrate           | 0.2779 (-0.1402, 0.6960)   | 0.1908 | 0.9986 | 0.2872 (-0.1502, 0.7246)  | 0.1961 | 0.9993 |
| MHiBP     | Acetate                     | -0.0773 (-0.3340, 0.1794)  | 0.5523 | 0.9986 | -0.0615 (-0.3283, 0.2052) | 0.6487 | 0.9993 |
| MHiBP     | Alanine                     | 0.0319 (-0.0839, 0.1477)   | 0.5864 | 0.9986 | 0.0494 (-0.0680, 0.1667)  | 0.4066 | 0.9993 |
| MHiBP     | Arginine                    | 0.0231 (-0.1315, 0.1777)   | 0.7679 | 0.9986 | 0.0272 (-0.1335, 0.1880)  | 0.7377 | 0.9993 |
| MHiBP     | Asparagine                  | 0.0160 (-0.1192, 0.1512)   | 0.8149 | 0.9986 | 0.0394 (-0.0979, 0.1766)  | 0.5712 | 0.9993 |
| MHiBP     | Aspartate                   | 0.0127 (-0.1058, 0.1313)   | 0.8320 | 0.9986 | 0.0249 (-0.0976, 0.1475)  | 0.6880 | 0.9993 |
| MHiBP     | Betaine                     | 0.0420 (-0.0923, 0.1763)   | 0.5373 | 0.9986 | 0.0690 (-0.0696, 0.2076)  | 0.3263 | 0.9993 |
| MHiBP     | Carnitine                   | 0.0003 (-0.1170, 0.1176)   | 0.9960 | 0.9986 | 0.0016 (-0.1207, 0.1238)  | 0.9799 | 0.9993 |
| MHiBP     | Choline                     | 0.0219 (-0.1037, 0.1475)   | 0.7309 | 0.9986 | 0.0296 (-0.1011, 0.1604)  | 0.6545 | 0.9993 |
| MHiBP     | Creatine                    | 0.0010 (-0.0991, 0.1011)   | 0.9840 | 0.9986 | 0.0139 (-0.0874, 0.1152)  | 0.7863 | 0.9993 |
| MHiBP     | Cystine                     | 0.1164 (-0.1347, 0.3675)   | 0.3608 | 0.9986 | 0.1084 (-0.1541, 0.3710)  | 0.4152 | 0.9993 |
| MHiBP     | Ethanolamine                | -0.0219 (-0.1527, 0.1090)  | 0.7413 | 0.9986 | -0.0164 (-0.1518, 0.1189) | 0.8104 | 0.9993 |
| MHiBP     | Formate                     | -0.0752 (-0.2204, 0.0700)  | 0.3076 | 0.9986 | -0.0521 (-0.1999, 0.0956) | 0.4860 | 0.9993 |
| MHiBP     | Fumarate                    | -0.1044 (-0.2886, 0.0797)  | 0.2638 | 0.9986 | -0.1036 (-0.2957, 0.0885) | 0.2876 | 0.9993 |
| MHiBP     | Glucitol                    | -0.0993 (-0.2454, 0.0468)  | 0.1809 | 0.9986 | -0.0810 (-0.2327, 0.0708) | 0.2931 | 0.9993 |
| MHiBP     | Glutamate                   | 0.0218 (-0.0880, 0.1315)   | 0.6955 | 0.9986 | 0.0399 (-0.0732, 0.1529)  | 0.4863 | 0.9993 |
| MHiBP     | Glutamine                   | 0.0314 (-0.0440, 0.1067)   | 0.4117 | 0.9986 | 0.0388 (-0.0364, 0.1141)  | 0.3089 | 0.9993 |
| MHiBP     | Glutathione                 | -0.0388 (-0.3210, 0.2435)  | 0.7863 | 0.9986 | -0.0304 (-0.3198, 0.2590) | 0.8357 | 0.9993 |
| MHiBP     | Glycerol                    | 0.0472 (-0.0979, 0.1924)   | 0.5208 | 0.9986 | 0.0542 (-0.0968, 0.2052)  | 0.4787 | 0.9993 |
| MHiBP     | Glycine                     | 0.0612 (-0.0576, 0.1799)   | 0.3099 | 0.9986 | 0.0872 (-0.0346, 0.2091)  | 0.1589 | 0.9993 |
| MHiBP     | Hypoxanthine                | -0.0133 (-0.1254, 0.0988)  | 0.8146 | 0.9986 | 0.0023 (-0.1125, 0.1172)  | 0.9679 | 0.9993 |
| MHiBP     | Inosine                     | -0.0606 (-0.3224, 0.2013)  | 0.6479 | 0.9986 | -0.0754 (-0.3415, 0.1907) | 0.5758 | 0.9993 |
| MHiBP     | Isoleucine                  | 0.0359 (-0.0952, 0.1671)   | 0.5888 | 0.9986 | 0.0608 (-0.0731, 0.1946)  | 0.3706 | 0.9993 |
| MHiBP     | Kynurenine                  | -0.2033 (-0.4023, -0.0043) | 0.0454 | 0.9986 | -0.1905 (-0.3969, 0.0159) | 0.0701 | 0.9993 |
| MHiBP     | Lactate                     | 0.0819 (-0.0020, 0.1658)   | 0.0556 | 0.9986 | 0.0897 (0.0029, 0.1764)   | 0.0429 | 0.9993 |
| MHiBP     | Leucine                     | 0.0360 (-0.0999, 0.1720)   | 0.6009 | 0.9986 | 0.0635 (-0.0747, 0.2018)  | 0.3648 | 0.9993 |
| MHiBP     | Lysine                      | -0.0092 (-0.1634, 0.1451)  | 0.9066 | 0.9986 | 0.0195 (-0.1380, 0.1771)  | 0.8064 | 0.9993 |
| MHiBP     | Methionine                  | 0.0512 (-0.0929, 0.1952)   | 0.4834 | 0.9986 | 0.0755 (-0.0703, 0.2212)  | 0.3075 | 0.9993 |
| MHiBP     | myo-Inositol                | 0.0466 (-0.0832, 0.1764)   | 0.4790 | 0.9986 | 0.0490 (-0.0842, 0.1823)  | 0.4676 | 0.9993 |
| MHiBP     | N-Acetylneuraminate         | -0.0995 (-0.2566, 0.0576)  | 0.2125 | 0.9986 | -0.0897 (-0.2534, 0.0740) | 0.2801 | 0.9993 |
| MHiBP     | NAD+                        | -0.0765 (-0.3749, 0.2220)  | 0.6131 | 0.9986 | -0.0869 (-0.3956, 0.2219) | 0.5785 | 0.9993 |
| MHiBP     | Niacinamide                 | 0.4123 (-0.1423, 0.9670)   | 0.1437 | 0.9986 | 0.4052 (-0.1668, 0.9773)  | 0.1633 | 0.9993 |
| MHiBP     | O-Acetylcarnitine           | -0.0294 (-0.1674, 0.1086)  | 0.6739 | 0.9986 | -0.0216 (-0.1654, 0.1222) | 0.7664 | 0.9993 |
| MHiBP     | O-Phosphocholine            | -0.1092 (-0.4672, 0.2487)  | 0.5470 | 0.9986 | -0.1131 (-0.4868, 0.2606) | 0.5502 | 0.9993 |
| MHiBP     | O-Phosphoethanolamine       | -0.0155 (-0.2726, 0.2416)  | 0.9052 | 0.9986 | 0.0204 (-0.2432, 0.2840)  | 0.8785 | 0.9993 |
| MHiBP     | Ornithine                   | 0.0587 (-0.1409, 0.2582)   | 0.5617 | 0.9986 | 0.0817 (-0.1241, 0.2875)  | 0.4335 | 0.9993 |
| MHiBP     | Pantothenate                | -0.0152 (-0.1932, 0.1628)  | 0.8660 | 0.9986 | -0.0544 (-0.2369, 0.1282) | 0.5565 | 0.9993 |
| MHiBP     | Phenylalanine               | 0.0430 (-0.0947, 0.1808)   | 0.5374 | 0.9986 | 0.0686 (-0.0719, 0.2091)  | 0.3355 | 0.9993 |
| MHiBP     | Proline                     | 0.0610 (-0.0567, 0.1786)   | 0.3071 | 0.9986 | 0.0772 (-0.0436, 0.1980)  | 0.2082 | 0.9993 |
| MHiBP     | Pyroglutamate               | -0.0499 (-0.2130, 0.1132)  | 0.5458 | 0.9986 | -0.0572 (-0.2275, 0.1130) | 0.5069 | 0.9993 |
| MHiBP     | Serine                      | 0.0310 (-0.1094, 0.1714)   | 0.6626 | 0.9986 | 0.0548 (-0.0880, 0.1976)  | 0.4488 | 0.9993 |
| MHiBP     | sn-Glycero-3-phosphocholine | 0.0339 (-0.1853, 0.2531)   | 0.7603 | 0.9986 | 0.0874 (-0.1307, 0.3055)  | 0.4292 | 0.9993 |
| MHiBP     | Succinate                   | 0.0140 (-0.2337, 0.2617)   | 0.9112 | 0.9986 | 0.0234 (-0.2327, 0.2796)  | 0.8567 | 0.9993 |
| MHiBP     | Taurine                     | -0.0086 (-0.1144, 0.0972)  | 0.8725 | 0.9986 | 0.0019 (-0.1077, 0.1114)  | 0.9733 | 0.9993 |
| MHiBP     | Threonine                   | 0.0781 (-0.0487, 0.2050)   | 0.2252 | 0.9986 | 0.1063 (-0.0214, 0.2339)  | 0.1018 | 0.9993 |
| MHiBP     | Tryptophan                  | 0.0036 (-0.2187, 0.2258)   | 0.9748 | 0.9986 | 0.0264 (-0.2016, 0.2543)  | 0.8192 | 0.9993 |
| MHiBP     | Tyrosine                    | 0.0627 (-0.0662, 0.1915)   | 0.3374 | 0.9986 | 0.0883 (-0.0428, 0.2194)  | 0.1847 | 0.9993 |
| MHiBP     | Uracil                      | 0.0645 (-0.1191, 0.2481)   | 0.4884 | 0.9986 | 0.0678 (-0.1224, 0.2580)  | 0.4816 | 0.9993 |
| MHiBP     | Uridine                     | -0.1246 (-0.3616, 0.1123)  | 0.2999 | 0.9986 | -0.0962 (-0.3418, 0.1495) | 0.4398 | 0.9993 |
| MHiBP     | Valine                      | 0.0324 (-0.0889, 0.1537)   | 0.5977 | 0.9986 | 0.0559 (-0.0676, 0.1794)  | 0.3717 | 0.9993 |

| Phthalate | Metabolite                  | Total Effect               |        |        | Direct Effect              |        |        |
|-----------|-----------------------------|----------------------------|--------|--------|----------------------------|--------|--------|
|           |                             | Estimate (95% CI)          | p      | FDR p  | Estimate (95% CI)          | p      | FDR p  |
| MiBP      | 1,3-Dihydroxyacetone        | -0.1639 (-0.4056, 0.0779)  | 0.1822 | 0.9986 | -0.1984 (-0.4514, 0.0547)  | 0.1233 | 0.9993 |
| MiBP      | 2-Hydroxybutyrate           | -0.0620 (-0.1814, 0.0574)  | 0.3059 | 0.9986 | -0.0861 (-0.2102, 0.0380)  | 0.1720 | 0.9993 |
| MiBP      | 3-Hydroxybutyrate           | 0.0266 (-0.2435, 0.2967)   | 0.8457 | 0.9986 | 0.0684 (-0.2086, 0.3454)   | 0.6258 | 0.9993 |
| MiBP      | 4-Aminobutyrate             | 0.0358 (-0.1153, 0.1869)   | 0.6397 | 0.9986 | 0.0418 (-0.1092, 0.1929)   | 0.5847 | 0.9993 |
| MiBP      | 4-Hydroxybutyrate           | 0.1979 (-0.1445, 0.5403)   | 0.2548 | 0.9986 | 0.1889 (-0.1710, 0.5489)   | 0.3008 | 0.9993 |
| MiBP      | Acetate                     | -0.0505 (-0.2605, 0.1594)  | 0.6346 | 0.9986 | -0.0333 (-0.2524, 0.1858)  | 0.7642 | 0.9993 |
| MiBP      | Alanine                     | 0.0247 (-0.0700, 0.1193)   | 0.6071 | 0.9986 | 0.0458 (-0.0505, 0.1420)   | 0.3485 | 0.9993 |
| MiBP      | Arginine                    | 0.0013 (-0.1252, 0.1278)   | 0.9837 | 0.9986 | 0.0116 (-0.1203, 0.1436)   | 0.8617 | 0.9993 |
| MiBP      | Asparagine                  | 0.0092 (-0.1013, 0.1198)   | 0.8689 | 0.9986 | 0.0400 (-0.0726, 0.1526)   | 0.4828 | 0.9993 |
| MiBP      | Aspartate                   | -0.0050 (-0.1019, 0.0919)  | 0.9189 | 0.9986 | 0.0071 (-0.0936, 0.1077)   | 0.8897 | 0.9993 |
| MiBP      | Betaine                     | 0.0075 (-0.1025, 0.1175)   | 0.8930 | 0.9986 | 0.0246 (-0.0896, 0.1387)   | 0.6707 | 0.9993 |
| MiBP      | Carnitine                   | -0.0252 (-0.1210, 0.0706)  | 0.6035 | 0.9986 | -0.0220 (-0.1223, 0.0782)  | 0.6643 | 0.9993 |
| MiBP      | Choline                     | 0.0097 (-0.0930, 0.1125)   | 0.8514 | 0.9986 | 0.0168 (-0.0906, 0.1242)   | 0.7576 | 0.9993 |
| MiBP      | Creatine                    | 0.0280 (-0.0537, 0.1097)   | 0.4989 | 0.9986 | 0.0322 (-0.0508, 0.1152)   | 0.4444 | 0.9993 |
| MiBP      | Cystine                     | 0.1532 (-0.0510, 0.3575)   | 0.1401 | 0.9986 | 0.1520 (-0.0623, 0.3664)   | 0.1629 | 0.9993 |
| MiBP      | Ethanolamine                | -0.0352 (-0.1420, 0.0717)  | 0.5158 | 0.9986 | -0.0268 (-0.1378, 0.0843)  | 0.6343 | 0.9993 |
| MiBP      | Formate                     | -0.0901 (-0.2082, 0.0280)  | 0.1337 | 0.9986 | -0.0726 (-0.1934, 0.0482)  | 0.2363 | 0.9993 |
| MiBP      | Fumarate                    | -0.1276 (-0.2772, 0.0221)  | 0.0940 | 0.9986 | -0.1319 (-0.2885, 0.0247)  | 0.0980 | 0.9993 |
| MiBP      | Glucitol                    | -0.1132 (-0.2318, 0.0054)  | 0.0612 | 0.9986 | -0.0973 (-0.2212, 0.0266)  | 0.1228 | 0.9993 |
| MiBP      | Glutamate                   | 0.0090 (-0.0807, 0.0988)   | 0.8425 | 0.9986 | 0.0280 (-0.0648, 0.1208)   | 0.5517 | 0.9993 |
| MiBP      | Glutamine                   | 0.0042 (-0.0575, 0.0660)   | 0.8921 | 0.9986 | 0.0134 (-0.0486, 0.0754)   | 0.6696 | 0.9993 |
| MiBP      | Glutathione                 | -0.1920 (-0.4203, 0.0363)  | 0.0986 | 0.9986 | -0.1849 (-0.4202, 0.0503)  | 0.1222 | 0.9993 |
| MiBP      | Glycerol                    | 0.0250 (-0.0938, 0.1437)   | 0.6783 | 0.9986 | 0.0337 (-0.0904, 0.1577)   | 0.5917 | 0.9993 |
| MiBP      | Glycine                     | 0.0404 (-0.0568, 0.1376)   | 0.4125 | 0.9986 | 0.0657 (-0.0345, 0.1658)   | 0.1967 | 0.9993 |
| MiBP      | Hypoxanthine                | -0.0191 (-0.1107, 0.0725)  | 0.6805 | 0.9986 | -0.0003 (-0.0946, 0.0940)  | 0.9946 | 0.9998 |
| MiBP      | Inosine                     | -0.0840 (-0.2978, 0.1297)  | 0.4380 | 0.9986 | -0.0980 (-0.3160, 0.1200)  | 0.3753 | 0.9993 |
| MiBP      | Isoleucine                  | 0.0302 (-0.0771, 0.1374)   | 0.5786 | 0.9986 | 0.0583 (-0.0514, 0.1680)   | 0.2951 | 0.9993 |
| MiBP      | Kynurenine                  | -0.2190 (-0.3798, -0.0582) | 0.0080 | 0.9986 | -0.2014 (-0.3693, -0.0335) | 0.0191 | 0.9993 |
| MiBP      | Lactate                     | 0.0684 (-0.0002, 0.1369)   | 0.0506 | 0.9986 | 0.0768 (0.0057, 0.1479)    | 0.0345 | 0.9993 |
| MiBP      | Leucine                     | 0.0318 (-0.0793, 0.1429)   | 0.5721 | 0.9986 | 0.0627 (-0.0506, 0.1760)   | 0.2755 | 0.9993 |
| MiBP      | Lysine                      | -0.0073 (-0.1335, 0.1188)  | 0.9085 | 0.9986 | 0.0237 (-0.1056, 0.1530)   | 0.7174 | 0.9993 |
| MiBP      | Methionine                  | 0.0502 (-0.0675, 0.1678)   | 0.4003 | 0.9986 | 0.0822 (-0.0371, 0.2014)   | 0.1750 | 0.9993 |
| MiBP      | myo-Inositol                | 0.0565 (-0.0494, 0.1624)   | 0.2929 | 0.9986 | 0.0575 (-0.0516, 0.1666)   | 0.2987 | 0.9993 |
| MiBP      | N-Acetylneuraminate         | -0.1272 (-0.2545, 0.0001)  | 0.0503 | 0.9986 | -0.1162 (-0.2495, 0.0172)  | 0.0872 | 0.9993 |
| MiBP      | NAD+                        | -0.1111 (-0.3546, 0.1323)  | 0.3682 | 0.9986 | -0.1141 (-0.3671, 0.1388)  | 0.3734 | 0.9993 |
| MiBP      | Niacinamide                 | 0.3759 (-0.0766, 0.8284)   | 0.1027 | 0.9986 | 0.3616 (-0.1073, 0.8304)   | 0.1294 | 0.9993 |
| MiBP      | O-Acetylcarnitine           | -0.0454 (-0.1579, 0.0672)  | 0.4269 | 0.9986 | -0.0349 (-0.1529, 0.0830)  | 0.5588 | 0.9993 |
| MiBP      | O-Phosphocholine            | -0.1330 (-0.4251, 0.1591)  | 0.3693 | 0.9986 | -0.1294 (-0.4357, 0.1769)  | 0.4046 | 0.9993 |
| MiBP      | O-Phosphoethanolamine       | -0.0241 (-0.2342, 0.1861)  | 0.8209 | 0.9986 | 0.0116 (-0.2048, 0.2280)   | 0.9159 | 0.9993 |
| MiBP      | Ornithine                   | 0.0813 (-0.0814, 0.2440)   | 0.3246 | 0.9986 | 0.1007 (-0.0677, 0.2691)   | 0.2388 | 0.9993 |
| MiBP      | Pantothenate                | -0.0187 (-0.1642, 0.1268)  | 0.7997 | 0.9986 | -0.0531 (-0.2028, 0.0967)  | 0.4844 | 0.9993 |
| MiBP      | Phenylalanine               | 0.0261 (-0.0866, 0.1388)   | 0.6477 | 0.9986 | 0.0544 (-0.0610, 0.1697)   | 0.3525 | 0.9993 |
| MiBP      | Proline                     | 0.0559 (-0.0402, 0.1520)   | 0.2519 | 0.9986 | 0.0758 (-0.0231, 0.1747)   | 0.1316 | 0.9993 |
| MiBP      | Pyroglutamate               | -0.0258 (-0.1592, 0.1076)  | 0.7027 | 0.9986 | -0.0355 (-0.1754, 0.1043)  | 0.6161 | 0.9993 |
| MiBP      | Serine                      | 0.0149 (-0.0999, 0.1298)   | 0.7972 | 0.9986 | 0.0452 (-0.0720, 0.1624)   | 0.4468 | 0.9993 |
| MiBP      | sn-Glycero-3-phosphocholine | 0.0402 (-0.1390, 0.2193)   | 0.6580 | 0.9986 | 0.1033 (-0.0752, 0.2818)   | 0.2542 | 0.9993 |
| MiBP      | Succinate                   | 0.0228 (-0.1797, 0.2253)   | 0.8238 | 0.9986 | 0.0422 (-0.1680, 0.2523)   | 0.6919 | 0.9993 |
| MiBP      | Taurine                     | -0.0318 (-0.1181, 0.0546)  | 0.4678 | 0.9986 | -0.0207 (-0.1106, 0.0691)  | 0.6485 | 0.9993 |
| MiBP      | Threonine                   | 0.0289 (-0.0753, 0.1331)   | 0.5845 | 0.9986 | 0.0617 (-0.0436, 0.1671)   | 0.2484 | 0.9993 |
| MiBP      | Tryptophan                  | 0.0660 (-0.1153, 0.2473)   | 0.4726 | 0.9986 | 0.0897 (-0.0967, 0.2762)   | 0.3427 | 0.9993 |
| MiBP      | Tyrosine                    | 0.0488 (-0.0566, 0.1542)   | 0.3613 | 0.9986 | 0.0795 (-0.0279, 0.1869)   | 0.1455 | 0.9993 |
| MiBP      | Uracil                      | 0.0495 (-0.1006, 0.1996)   | 0.5153 | 0.9986 | 0.0577 (-0.0984, 0.2138)   | 0.4656 | 0.9993 |
| MiBP      | Uridine                     | -0.1434 (-0.3363, 0.0495)  | 0.1438 | 0.9986 | -0.1179 (-0.3190, 0.0831)  | 0.2477 | 0.9993 |
| MiBP      | Valine                      | 0.0260 (-0.0731, 0.1252)   | 0.6043 | 0.9986 | 0.0521 (-0.0492, 0.1534)   | 0.3104 | 0.9993 |
| MNP       | 1,3-Dihydroxyacetone        | 0.0477 (-0.1929, 0.2884)   | 0.6955 | 0.9986 | 0.0374 (-0.2198, 0.2947)   | 0.7737 | 0.9993 |
| MNP       | 2-Hydroxybutyrate           | -0.0320 (-0.1504, 0.0865)  | 0.5942 | 0.9986 | -0.0333 (-0.1590, 0.0925)  | 0.6014 | 0.9993 |
| MNP       | 3-Hydroxybutyrate           | -0.0425 (-0.3096, 0.2245)  | 0.7532 | 0.9986 | 0.0056 (-0.2736, 0.2848)   | 0.9686 | 0.9993 |
| MNP       | 4-Aminobutyrate             | -0.0266 (-0.1760, 0.1229)  | 0.7256 | 0.9986 | -0.0581 (-0.2101, 0.0938)  | 0.4504 | 0.9993 |
| MNP       | 4-Hydroxybutyrate           | 0.0662 (-0.2739, 0.4064)   | 0.7006 | 0.9986 | 0.0970 (-0.2667, 0.4607)   | 0.5984 | 0.9993 |
| MNP       | Acetate                     | -0.0354 (-0.2432, 0.1723)  | 0.7363 | 0.9986 | -0.0213 (-0.2420, 0.1994)  | 0.8491 | 0.9993 |

| Phthalate | Metabolite                  | Total Effect               |        |        | Direct Effect              |        |        |
|-----------|-----------------------------|----------------------------|--------|--------|----------------------------|--------|--------|
|           |                             | Estimate (95% CI)          | p      | FDR p  | Estimate (95% CI)          | p      | FDR p  |
| MNP       | Alanine                     | -0.0120 (-0.1057, 0.0817)  | 0.7999 | 0.9986 | -0.0154 (-0.1127, 0.0818)  | 0.7541 | 0.9993 |
| MNP       | Arginine                    | -0.0620 (-0.1866, 0.0626)  | 0.3264 | 0.9986 | -0.0667 (-0.1990, 0.0657)  | 0.3207 | 0.9993 |
| MNP       | Asparagine                  | -0.0558 (-0.1647, 0.0531)  | 0.3123 | 0.9986 | -0.0577 (-0.1709, 0.0554)  | 0.3146 | 0.9993 |
| MNP       | Aspartate                   | -0.0710 (-0.1660, 0.0241)  | 0.1420 | 0.9986 | -0.0685 (-0.1691, 0.0321)  | 0.1800 | 0.9993 |
| MNP       | Betaine                     | -0.1135 (-0.2204, -0.0066) | 0.0377 | 0.9986 | -0.1204 (-0.2333, -0.0074) | 0.0369 | 0.9993 |
| MNP       | Carnitine                   | -0.0594 (-0.1537, 0.0348)  | 0.2145 | 0.9986 | -0.0767 (-0.1768, 0.0234)  | 0.1317 | 0.9993 |
| MNP       | Choline                     | -0.0284 (-0.1299, 0.0731)  | 0.5804 | 0.9986 | -0.0246 (-0.1327, 0.0835)  | 0.6536 | 0.9993 |
| MNP       | Creatine                    | -0.0014 (-0.0823, 0.0795)  | 0.9730 | 0.9986 | 0.0061 (-0.0777, 0.0899)   | 0.8855 | 0.9993 |
| MNP       | Cystine                     | 0.0411 (-0.1625, 0.2447)   | 0.6900 | 0.9986 | 0.0476 (-0.1699, 0.2651)   | 0.6657 | 0.9993 |
| MNP       | Ethanolamine                | 0.0089 (-0.0970, 0.1147)   | 0.8688 | 0.9986 | -0.0034 (-0.1153, 0.1086)  | 0.9525 | 0.9993 |
| MNP       | Formate                     | -0.0516 (-0.1692, 0.0659)  | 0.3865 | 0.9986 | -0.0409 (-0.1630, 0.0813)  | 0.5087 | 0.9993 |
| MNP       | Fumarate                    | -0.0686 (-0.2177, 0.0805)  | 0.3644 | 0.9986 | -0.0713 (-0.2303, 0.0877)  | 0.3764 | 0.9993 |
| MNP       | Glucitol                    | -0.0568 (-0.1753, 0.0617)  | 0.3449 | 0.9986 | -0.0459 (-0.1717, 0.0799)  | 0.4715 | 0.9993 |
| MNP       | Glutamate                   | -0.0078 (-0.0966, 0.0810)  | 0.8626 | 0.9986 | 0.0012 (-0.0924, 0.0948)   | 0.9794 | 0.9993 |
| MNP       | Glutamine                   | -0.0353 (-0.0961, 0.0255)  | 0.2525 | 0.9986 | -0.0487 (-0.1106, 0.0131)  | 0.1213 | 0.9993 |
| MNP       | Glutathione                 | -0.2156 (-0.4407, 0.0095)  | 0.0603 | 0.9986 | -0.2467 (-0.4817, -0.0116) | 0.0399 | 0.9993 |
| MNP       | Glycerol                    | -0.0269 (-0.1443, 0.0906)  | 0.6516 | 0.9986 | -0.0239 (-0.1489, 0.1011)  | 0.7059 | 0.9993 |
| MNP       | Glycine                     | -0.0217 (-0.1180, 0.0746)  | 0.6567 | 0.9986 | -0.0122 (-0.1137, 0.0894)  | 0.8128 | 0.9993 |
| MNP       | Hypoxanthine                | -0.0249 (-0.1154, 0.0656)  | 0.5872 | 0.9986 | -0.0277 (-0.1226, 0.0671)  | 0.5638 | 0.9993 |
| MNP       | Inosine                     | 0.0215 (-0.1904, 0.2334)   | 0.8411 | 0.9986 | 0.0200 (-0.2002, 0.2402)   | 0.8576 | 0.9993 |
| MNP       | Isoleucine                  | -0.0278 (-0.1338, 0.0783)  | 0.6054 | 0.9986 | -0.0212 (-0.1321, 0.0898)  | 0.7063 | 0.9993 |
| MNP       | Kynurenine                  | -0.1437 (-0.3053, 0.0178)  | 0.0807 | 0.9986 | -0.1617 (-0.3322, 0.0088)  | 0.0629 | 0.9993 |
| MNP       | Lactate                     | 0.0188 (-0.0500, 0.0876)   | 0.5893 | 0.9986 | 0.0152 (-0.0577, 0.0881)   | 0.6798 | 0.9993 |
| MNP       | Leucine                     | -0.0371 (-0.1469, 0.0728)  | 0.5057 | 0.9986 | -0.0310 (-0.1455, 0.0836)  | 0.5932 | 0.9993 |
| MNP       | Lysine                      | -0.0285 (-0.1531, 0.0962)  | 0.6519 | 0.9986 | -0.0204 (-0.1506, 0.1098)  | 0.7572 | 0.9993 |
| MNP       | Methionine                  | -0.0082 (-0.1248, 0.1085)  | 0.8899 | 0.9986 | 0.0044 (-0.1166, 0.1254)   | 0.9427 | 0.9993 |
| MNP       | myo-Inositol                | 0.0374 (-0.0675, 0.1424)   | 0.4816 | 0.9986 | 0.0597 (-0.0502, 0.1695)   | 0.2843 | 0.9993 |
| MNP       | N-Acetylneuraminate         | -0.1335 (-0.2591, -0.0078) | 0.0375 | 0.9986 | -0.1320 (-0.2659, 0.0018)  | 0.0532 | 0.9993 |
| MNP       | NAD+                        | -0.0726 (-0.3138, 0.1687)  | 0.5527 | 0.9986 | -0.1192 (-0.3739, 0.1354)  | 0.3557 | 0.9993 |
| MNP       | Niacinamide                 | 0.1726 (-0.2787, 0.6239)   | 0.4506 | 0.9986 | 0.1533 (-0.3226, 0.6293)   | 0.5247 | 0.9993 |
| MNP       | O-Acetylcarnitine           | -0.0507 (-0.1620, 0.0606)  | 0.3688 | 0.9986 | -0.0671 (-0.1854, 0.0512)  | 0.2638 | 0.9993 |
| MNP       | O-Phosphocholine            | -0.1612 (-0.4496, 0.1272)  | 0.2708 | 0.9986 | -0.2231 (-0.5299, 0.0836)  | 0.1524 | 0.9993 |
| MNP       | O-Phosphoethanolamine       | -0.1654 (-0.3713, 0.0404)  | 0.1142 | 0.9986 | -0.1587 (-0.3747, 0.0573)  | 0.1484 | 0.9993 |
| MNP       | Ornithine                   | 0.0050 (-0.1566, 0.1665)   | 0.9515 | 0.9986 | 0.0280 (-0.1425, 0.1984)   | 0.7460 | 0.9993 |
| MNP       | Pantothenate                | 0.0308 (-0.1130, 0.1747)   | 0.6724 | 0.9986 | -0.0090 (-0.1601, 0.1422)  | 0.9068 | 0.9993 |
| MNP       | Phenylalanine               | -0.0746 (-0.1854, 0.0361)  | 0.1849 | 0.9986 | -0.0673 (-0.1832, 0.0487)  | 0.2529 | 0.9993 |
| MNP       | Proline                     | -0.0142 (-0.1097, 0.0813)  | 0.7688 | 0.9986 | -0.0105 (-0.1110, 0.0900)  | 0.8359 | 0.9993 |
| MNP       | Pyroglutamate               | -0.0359 (-0.1678, 0.0959)  | 0.5905 | 0.9986 | -0.0362 (-0.1770, 0.1047)  | 0.6121 | 0.9993 |
| MNP       | Serine                      | -0.0491 (-0.1624, 0.0642)  | 0.3925 | 0.9986 | -0.0436 (-0.1616, 0.0745)  | 0.4662 | 0.9993 |
| MNP       | sn-Glycero-3-phosphocholine | -0.0297 (-0.2069, 0.1475)  | 0.7406 | 0.9986 | -0.0374 (-0.2180, 0.1432)  | 0.6825 | 0.9993 |
| MNP       | Succinate                   | 0.1646 (-0.0336, 0.3628)   | 0.1028 | 0.9986 | 0.1649 (-0.0448, 0.3746)   | 0.1221 | 0.9993 |
| MNP       | Taurine                     | 0.0108 (-0.0747, 0.0964)   | 0.8026 | 0.9986 | 0.0071 (-0.0834, 0.0976)   | 0.8770 | 0.9993 |
| MNP       | Threonine                   | -0.0459 (-0.1487, 0.0570)  | 0.3794 | 0.9986 | -0.0390 (-0.1455, 0.0675)  | 0.4698 | 0.9993 |
| MNP       | Tryptophan                  | 0.1021 (-0.0767, 0.2809)   | 0.2606 | 0.9986 | 0.1442 (-0.0424, 0.3309)   | 0.1287 | 0.9993 |
| MNP       | Tyrosine                    | -0.0202 (-0.1247, 0.0843)  | 0.7032 | 0.9986 | -0.0139 (-0.1230, 0.0952)  | 0.8011 | 0.9993 |
| MNP       | Uracil                      | -0.0150 (-0.1637, 0.1337)  | 0.8422 | 0.9986 | -0.0154 (-0.1729, 0.1420)  | 0.8463 | 0.9993 |
| MNP       | Uridine                     | 0.0548 (-0.1374, 0.2470)   | 0.5738 | 0.9986 | 0.0897 (-0.1132, 0.2927)   | 0.3830 | 0.9993 |
| MNP       | Valine                      | -0.0358 (-0.1338, 0.0622)  | 0.4713 | 0.9986 | -0.0287 (-0.1310, 0.0736)  | 0.5796 | 0.9993 |

**Table S7:** Associations between placenta metabolites and birth year. In samples with a molar sum of urinary DEHP metabolites below the median ( $n = 66$ ), we conducted multiple linear regressions to measure the association between each  $\log_{10}$ -transformed placenta metabolite concentration and birth year after adjustment for gestational age at delivery, maternal metabolic condition, homeownership status, maternal race/ethnicity, and maternal education. We conducted permutation testing under the reduced model using 4999 permutations for each metabolite and corrected for false discovery rate (FDR). Only metabolites with FDR  $p$ -values  $\geq 0.1$  are reported here.

| Metabolite                  | Coefficient (95% CI)       | $R^2$  | $p$    | FDR $p$ |
|-----------------------------|----------------------------|--------|--------|---------|
| 1,3-Dihydroxyacetone        | -0.0220 (-0.1231, 0.0790)  | 0.0030 | 0.6668 | 0.7502  |
| 2-Hydroxybutyrate           | 0.0118 (-0.0360, 0.0595)   | 0.0038 | 0.6134 | 0.7421  |
| 3-Hydroxybutyrate           | 0.0030 (-0.1019, 0.1078)   | 0.0000 | 0.9558 | 0.9738  |
| 4-Aminobutyrate             | -0.0153 (-0.0670, 0.0364)  | 0.0054 | 0.5618 | 0.7421  |
| 4-Hydroxybutyrate           | -0.0384 (-0.1330, 0.0561)  | 0.0102 | 0.4234 | 0.6666  |
| Acetate                     | 0.0150 (-0.0437, 0.0738)   | 0.0041 | 0.6068 | 0.7421  |
| Alanine                     | -0.0269 (-0.0636, 0.0098)  | 0.0324 | 0.1460 | 0.3072  |
| Asparagine                  | -0.0408 (-0.0792, -0.0025) | 0.0661 | 0.0392 | 0.1058  |
| Aspartate                   | 0.0097 (-0.0228, 0.0421)   | 0.0055 | 0.5724 | 0.7421  |
| Betaine                     | 0.0273 (-0.0164, 0.0710)   | 0.0238 | 0.2098 | 0.3907  |
| Carnitine                   | 0.0156 (-0.0189, 0.0502)   | 0.0126 | 0.3762 | 0.6348  |
| Choline                     | -0.0085 (-0.0432, 0.0262)  | 0.0037 | 0.6322 | 0.7421  |
| Ethanolamine                | -0.0140 (-0.0505, 0.0224)  | 0.0092 | 0.4444 | 0.6666  |
| Formate                     | -0.0075 (-0.0394, 0.0244)  | 0.0035 | 0.6312 | 0.7421  |
| Fumarate                    | 0.0636 (-0.0056, 0.1327)   | 0.0500 | 0.0622 | 0.1460  |
| Glucitol                    | 0.0014 (-0.0422, 0.0451)   | 0.0001 | 0.9420 | 0.9738  |
| Glutamate                   | -0.0078 (-0.0380, 0.0223)  | 0.0042 | 0.6138 | 0.7421  |
| Glutamine                   | 0.0086 (-0.0174, 0.0346)   | 0.0068 | 0.5244 | 0.7421  |
| Glycerol                    | -0.0282 (-0.0667, 0.0103)  | 0.0324 | 0.1536 | 0.3072  |
| Glycine                     | -0.0342 (-0.0690, 6e-04)   | 0.0569 | 0.0538 | 0.1321  |
| Hypoxanthine                | -0.0263 (-0.0625, 0.0100)  | 0.0317 | 0.1492 | 0.3072  |
| Kynurenine                  | -1e-04 (-0.0666, 0.0665)   | 0.0000 | 0.9974 | 0.9974  |
| Lactate                     | -0.0069 (-0.0334, 0.0195)  | 0.0043 | 0.6052 | 0.7421  |
| myo-Inositol                | 0.0058 (-0.0274, 0.0390)   | 0.0019 | 0.7360 | 0.8111  |
| N-Acetylneuraminate         | 0.0167 (-0.0281, 0.0616)   | 0.0086 | 0.4444 | 0.6666  |
| Niacinamide                 | 0.0185 (-0.1348, 0.1717)   | 0.0009 | 0.8028 | 0.8500  |
| O-Acetylcarnitine           | 0.0061 (-0.0350, 0.0472)   | 0.0014 | 0.7706 | 0.8322  |
| Pantothenate                | -0.0160 (-0.0732, 0.0413)  | 0.0048 | 0.5844 | 0.7421  |
| Proline                     | -0.0247 (-0.0601, 0.0107)  | 0.0295 | 0.1636 | 0.3155  |
| sn-Glycero-3-phosphocholine | -0.0572 (-0.1290, 0.0145)  | 0.0382 | 0.1232 | 0.2772  |
| Succinate                   | -0.0097 (-0.0546, 0.0352)  | 0.0029 | 0.6568 | 0.7502  |
| Taurine                     | 0.0144 (-0.0143, 0.0431)   | 0.0154 | 0.3266 | 0.5689  |
| Threonine                   | -0.0151 (-0.0537, 0.0235)  | 0.0095 | 0.4302 | 0.6666  |
| Uridine                     | -0.0261 (-0.0746, 0.0225)  | 0.0177 | 0.2884 | 0.5191  |
| Valine                      | -0.0333 (-0.0673, 7e-04)   | 0.0564 | 0.0532 | 0.1321  |

**Table S8:** Associations between placenta metabolites and neurodevelopmental outcomes in all children and stratified by sex. Single-response PERMANOVA was used to assess the association between each log<sub>10</sub>-transformed serum metabolite concentration and neurodevelopmental outcome after adjustment for birth year, birth weight, gestational age at delivery, delivery mode, homeownership status, prenatal vitamin use in the first month of pregnancy, maternal age, maternal metabolic condition, and maternal race/ethnicity. Significance was assessed using permutation testing under 4999 permutations and *p*-values were corrected for false discovery rate (FDR).

|                      | All Children |                       |          |              |                      |                          | Males    |                       |          |              | Females  |                       |          |              |
|----------------------|--------------|-----------------------|----------|--------------|----------------------|--------------------------|----------|-----------------------|----------|--------------|----------|-----------------------|----------|--------------|
| Metabolite           | <i>F</i>     | <i>R</i> <sup>2</sup> | <i>p</i> | FDR <i>p</i> | Interaction <i>p</i> | Interaction FDR <i>p</i> | <i>F</i> | <i>R</i> <sup>2</sup> | <i>p</i> | FDR <i>p</i> | <i>F</i> | <i>R</i> <sup>2</sup> | <i>p</i> | FDR <i>p</i> |
| 1,3-Dihydroxyacetone | 2.32         | 0.0363                | 0.0948   | 0.3470       | 0.6806               | 0.9396                   | 2.65     | 0.0669                | 0.0824   | 0.2462       | 0.70     | 0.0283                | 0.4980   | 0.8424       |
| 2-Hydroxybutyrate    | 1.37         | 0.0221                | 0.2670   | 0.4651       | 0.7282               | 0.9396                   | 0.70     | 0.0197                | 0.4956   | 0.6082       | 1.55     | 0.0536                | 0.2160   | 0.8424       |
| 3-Hydroxybutyrate    | 0.88         | 0.0134                | 0.4272   | 0.5948       | 0.4964               | 0.9396                   | 0.09     | 0.0025                | 0.9152   | 0.9325       | 2.03     | 0.0644                | 0.1464   | 0.8273       |
| 4-Aminobutyrate      | 0.07         | 0.0011                | 0.9334   | 0.9334       | 0.1640               | 0.8856                   | 0.48     | 0.0118                | 0.6208   | 0.7176       | 0.78     | 0.0269                | 0.4648   | 0.8424       |
| 4-Hydroxybutyrate    | 0.63         | 0.0098                | 0.5372   | 0.6593       | 0.8386               | 0.9396                   | 0.27     | 0.0074                | 0.7702   | 0.8146       | 0.05     | 0.0019                | 0.9550   | 0.9902       |
| Acetate              | 0.29         | 0.0047                | 0.7458   | 0.8055       | 0.3374               | 0.9114                   | 1.88     | 0.0525                | 0.1588   | 0.3427       | 0.84     | 0.0306                | 0.4322   | 0.8424       |
| Alanine              | 2.24         | 0.0292                | 0.1102   | 0.3470       | 0.3052               | 0.9114                   | 3.17     | 0.0718                | 0.0466   | 0.2462       | 0.16     | 0.0053                | 0.8506   | 0.9569       |
| Arginine             | 0.82         | 0.0124                | 0.4472   | 0.6037       | 0.0922               | 0.6224                   | 2.05     | 0.0500                | 0.1318   | 0.2966       | 0.58     | 0.0205                | 0.5654   | 0.8424       |
| Asparagine           | 1.22         | 0.0168                | 0.3140   | 0.5138       | 0.6654               | 0.9396                   | 1.18     | 0.0270                | 0.3156   | 0.4606       | 0.80     | 0.0290                | 0.4454   | 0.8424       |
| Aspartate            | 1.63         | 0.0255                | 0.2102   | 0.4054       | 0.7326               | 0.9396                   | 1.41     | 0.0391                | 0.2594   | 0.4377       | 0.94     | 0.0396                | 0.4106   | 0.8424       |
| Betaine              | 0.50         | 0.0076                | 0.6118   | 0.7342       | 0.7016               | 0.9396                   | 0.25     | 0.0067                | 0.7844   | 0.8146       | 0.18     | 0.0054                | 0.8360   | 0.9569       |
| Carnitine            | 0.83         | 0.0130                | 0.4296   | 0.5948       | 0.5990               | 0.9396                   | 0.26     | 0.0074                | 0.7626   | 0.8146       | 2.98     | 0.1127                | 0.0626   | 0.6761       |
| Choline              | 1.88         | 0.0286                | 0.1542   | 0.3470       | 0.9406               | 0.9406                   | 1.54     | 0.0424                | 0.2272   | 0.3958       | 4.02     | 0.1256                | 0.0292   | 0.5256       |
| Creatine             | 2.19         | 0.0313                | 0.1158   | 0.3470       | 0.8990               | 0.9396                   | 1.55     | 0.0414                | 0.2200   | 0.3958       | 1.09     | 0.0359                | 0.3564   | 0.8424       |
| Cystine              | 2.08         | 0.0263                | 0.1310   | 0.3470       | 0.0356               | 0.4806                   | 4.25     | 0.0868                | 0.0198   | 0.2114       | 1.00     | 0.0336                | 0.3734   | 0.8424       |
| Ethanolamine         | 2.92         | 0.0415                | 0.0584   | 0.3470       | 0.6226               | 0.9396                   | 3.30     | 0.0783                | 0.0478   | 0.2462       | 2.04     | 0.0670                | 0.1532   | 0.8273       |
| Formate              | 0.44         | 0.0065                | 0.6370   | 0.7478       | 0.6976               | 0.9396                   | 0.49     | 0.0132                | 0.6246   | 0.7176       | 0.24     | 0.0084                | 0.7468   | 0.9393       |
| Fumarate             | 3.04         | 0.0460                | 0.0534   | 0.3470       | 0.2014               | 0.9114                   | 4.45     | 0.1157                | 0.0192   | 0.2114       | 0.07     | 0.0028                | 0.9268   | 0.9902       |
| Glucitol             | 0.77         | 0.0121                | 0.4644   | 0.6116       | 0.8956               | 0.9396                   | 0.34     | 0.0103                | 0.7004   | 0.7811       | 1.20     | 0.0479                | 0.3082   | 0.8424       |
| Glutamate            | 2.77         | 0.0403                | 0.0714   | 0.3470       | 0.4682               | 0.9396                   | 2.96     | 0.0759                | 0.0536   | 0.2462       | 0.77     | 0.0273                | 0.4646   | 0.8424       |
| Glutamine            | 1.13         | 0.0165                | 0.3304   | 0.5248       | 0.7580               | 0.9396                   | 1.29     | 0.0319                | 0.2800   | 0.4582       | 0.01     | 0.0005                | 0.9902   | 0.9902       |
| Glutathione          | 0.68         | 0.0081                | 0.5070   | 0.6367       | 0.0814               | 0.6224                   | 3.13     | 0.0605                | 0.0598   | 0.2462       | 0.91     | 0.0282                | 0.4152   | 0.8424       |
| Glycerol             | 2.40         | 0.0338                | 0.0916   | 0.3470       | 0.8680               | 0.9396                   | 1.82     | 0.0454                | 0.1650   | 0.3427       | 4.06     | 0.1232                | 0.0246   | 0.5256       |
| Glycine              | 2.41         | 0.0308                | 0.0866   | 0.3470       | 0.3744               | 0.9114                   | 2.84     | 0.0632                | 0.0648   | 0.2462       | 0.32     | 0.0107                | 0.7328   | 0.9393       |
| Hypoxanthine         | 1.85         | 0.0260                | 0.1620   | 0.3499       | 0.2410               | 0.9114                   | 3.82     | 0.0926                | 0.0252   | 0.2114       | 0.03     | 0.0012                | 0.9612   | 0.9902       |
| Inosine              | 0.88         | 0.0098                | 0.4162   | 0.5948       | 0.2278               | 0.9114                   | 1.66     | 0.0342                | 0.2040   | 0.3934       | 0.28     | 0.0081                | 0.7716   | 0.9470       |
| Isoleucine           | 2.37         | 0.0296                | 0.1014   | 0.3470       | 0.6022               | 0.9396                   | 2.70     | 0.0579                | 0.0782   | 0.2462       | 0.65     | 0.0204                | 0.5270   | 0.8424       |
| Kynurenine           | 0.82         | 0.0131                | 0.4186   | 0.5948       | 0.3488               | 0.9114                   | 1.22     | 0.0325                | 0.3048   | 0.4606       | 0.12     | 0.0040                | 0.8868   | 0.9773       |
| Lactate              | 1.35         | 0.0205                | 0.2638   | 0.4651       | 0.8834               | 0.9396                   | 1.08     | 0.0288                | 0.3498   | 0.4843       | 0.52     | 0.0181                | 0.5998   | 0.8424       |
| Leucine              | 2.04         | 0.0249                | 0.1314   | 0.3470       | 0.4990               | 0.9396                   | 2.51     | 0.0513                | 0.0912   | 0.2462       | 0.50     | 0.0159                | 0.6084   | 0.8424       |
| Lysine               | 1.98         | 0.0255                | 0.1482   | 0.3470       | 0.3760               | 0.9114                   | 2.80     | 0.0599                | 0.0644   | 0.2462       | 0.54     | 0.0168                | 0.5826   | 0.8424       |
| Methionine           | 2.75         | 0.0325                | 0.0702   | 0.3470       | 0.3882               | 0.9114                   | 3.87     | 0.0761                | 0.0274   | 0.2114       | 0.44     | 0.0131                | 0.6482   | 0.8751       |
| myo-Inositol         | 2.60         | 0.0383                | 0.0816   | 0.3470       | 0.9186               | 0.9396                   | 1.20     | 0.0330                | 0.3076   | 0.4606       | 1.15     | 0.0450                | 0.3200   | 0.8424       |
| N-Acetylneuraminate  | 1.30         | 0.0203                | 0.2776   | 0.4685       | 0.8600               | 0.9396                   | 0.35     | 0.0097                | 0.7088   | 0.7811       | 3.03     | 0.1013                | 0.0562   | 0.6761       |
| NAD+                 | 0.69         | 0.0073                | 0.4986   | 0.6367       | 0.0020               | 0.0540                   | 5.75     | 0.0901                | 0.0064   | 0.2114       | 1.96     | 0.0537                | 0.1460   | 0.8273       |
| Niacinamide          | 3.13         | 0.0478                | 0.0420   | 0.3470       | 0.7696               | 0.9396                   | 2.36     | 0.0629                | 0.0980   | 0.2520       | 1.01     | 0.0423                | 0.3688   | 0.8424       |
| O-Acetylcarnitine    | 1.97         | 0.0305                | 0.1432   | 0.3470       | 0.7492               | 0.9396                   | 1.05     | 0.0295                | 0.3480   | 0.4843       | 1.75     | 0.0644                | 0.1818   | 0.8424       |



|                             | All Children |                       |          |              |                      |                          | Males    |                       |          |              | Females  |                       |          |              |
|-----------------------------|--------------|-----------------------|----------|--------------|----------------------|--------------------------|----------|-----------------------|----------|--------------|----------|-----------------------|----------|--------------|
| Metabolite                  | <i>F</i>     | <i>R</i> <sup>2</sup> | <i>p</i> | FDR <i>p</i> | Interaction <i>p</i> | Interaction FDR <i>p</i> | <i>F</i> | <i>R</i> <sup>2</sup> | <i>p</i> | FDR <i>p</i> | <i>F</i> | <i>R</i> <sup>2</sup> | <i>p</i> | FDR <i>p</i> |
| O-Phosphocholine            | 0.07         | 0.0009                | 0.9268   | 0.9334       | 0.0266               | 0.4788                   | 0.83     | 0.0168                | 0.4456   | 0.5729       | 1.91     | 0.0510                | 0.1442   | 0.8273       |
| O-Phosphoethanolamine       | 0.16         | 0.0019                | 0.8516   | 0.8941       | 0.0764               | 0.6224                   | 0.84     | 0.0163                | 0.4312   | 0.5679       | 0.79     | 0.0240                | 0.4628   | 0.8424       |
| Ornithine                   | 1.35         | 0.0174                | 0.2650   | 0.4651       | 0.2468               | 0.9114                   | 1.80     | 0.0389                | 0.1770   | 0.3540       | 0.51     | 0.0190                | 0.5972   | 0.8424       |
| Pantothenate                | 0.40         | 0.0060                | 0.6742   | 0.7585       | 0.1178               | 0.7068                   | 0.74     | 0.0197                | 0.4912   | 0.6082       | 2.05     | 0.0697                | 0.1312   | 0.8273       |
| Phenylalanine               | 1.65         | 0.0207                | 0.1972   | 0.4054       | 0.2778               | 0.9114                   | 2.54     | 0.0532                | 0.0898   | 0.2462       | 0.59     | 0.0190                | 0.5618   | 0.8424       |
| Proline                     | 2.05         | 0.0281                | 0.1380   | 0.3470       | 0.6180               | 0.9396                   | 2.28     | 0.0558                | 0.1094   | 0.2569       | 0.18     | 0.0057                | 0.8418   | 0.9569       |
| Pyroglutamate               | 0.15         | 0.0018                | 0.8610   | 0.8941       | 0.0010               | 0.0540                   | 4.19     | 0.0766                | 0.0214   | 0.2114       | 1.52     | 0.0442                | 0.2300   | 0.8424       |
| Serine                      | 2.05         | 0.0255                | 0.1300   | 0.3470       | 0.3094               | 0.9114                   | 2.68     | 0.0553                | 0.0824   | 0.2462       | 0.30     | 0.0106                | 0.7480   | 0.9393       |
| sn-Glycero-3-phosphocholine | 1.64         | 0.0231                | 0.2062   | 0.4054       | 0.9222               | 0.9396                   | 0.87     | 0.0228                | 0.4236   | 0.5679       | 0.67     | 0.0255                | 0.5082   | 0.8424       |
| Succinate                   | 1.06         | 0.0165                | 0.3496   | 0.5394       | 0.7392               | 0.9396                   | 0.65     | 0.0184                | 0.5232   | 0.6278       | 0.93     | 0.0339                | 0.4094   | 0.8424       |
| Taurine                     | 3.26         | 0.0471                | 0.0418   | 0.3470       | 0.6246               | 0.9396                   | 1.16     | 0.0312                | 0.3112   | 0.4606       | 4.78     | 0.1690                | 0.0146   | 0.5256       |
| Threonine                   | 2.58         | 0.0327                | 0.0798   | 0.3470       | 0.8714               | 0.9396                   | 2.41     | 0.0502                | 0.1028   | 0.2523       | 1.47     | 0.0488                | 0.2358   | 0.8424       |
| Tryptophan                  | 0.38         | 0.0049                | 0.6968   | 0.7679       | 0.7674               | 0.9396                   | 0.05     | 0.0013                | 0.9544   | 0.9544       | 1.32     | 0.0392                | 0.2888   | 0.8424       |
| Tyrosine                    | 2.69         | 0.0341                | 0.0720   | 0.3470       | 0.6006               | 0.9396                   | 2.80     | 0.0598                | 0.0660   | 0.2462       | 0.81     | 0.0279                | 0.4494   | 0.8424       |
| Uracil                      | 0.42         | 0.0057                | 0.6570   | 0.7549       | 0.3158               | 0.9114                   | 1.56     | 0.0369                | 0.2132   | 0.3958       | 0.03     | 0.0007                | 0.9742   | 0.9902       |
| Uridine                     | 3.41         | 0.0504                | 0.0390   | 0.3470       | 0.0904               | 0.6224                   | 4.01     | 0.1020                | 0.0208   | 0.2114       | 0.21     | 0.0076                | 0.8074   | 0.9569       |
| Valine                      | 2.27         | 0.0284                | 0.1074   | 0.3470       | 0.5594               | 0.9396                   | 2.65     | 0.0565                | 0.0864   | 0.2462       | 0.53     | 0.0174                | 0.5818   | 0.8424       |

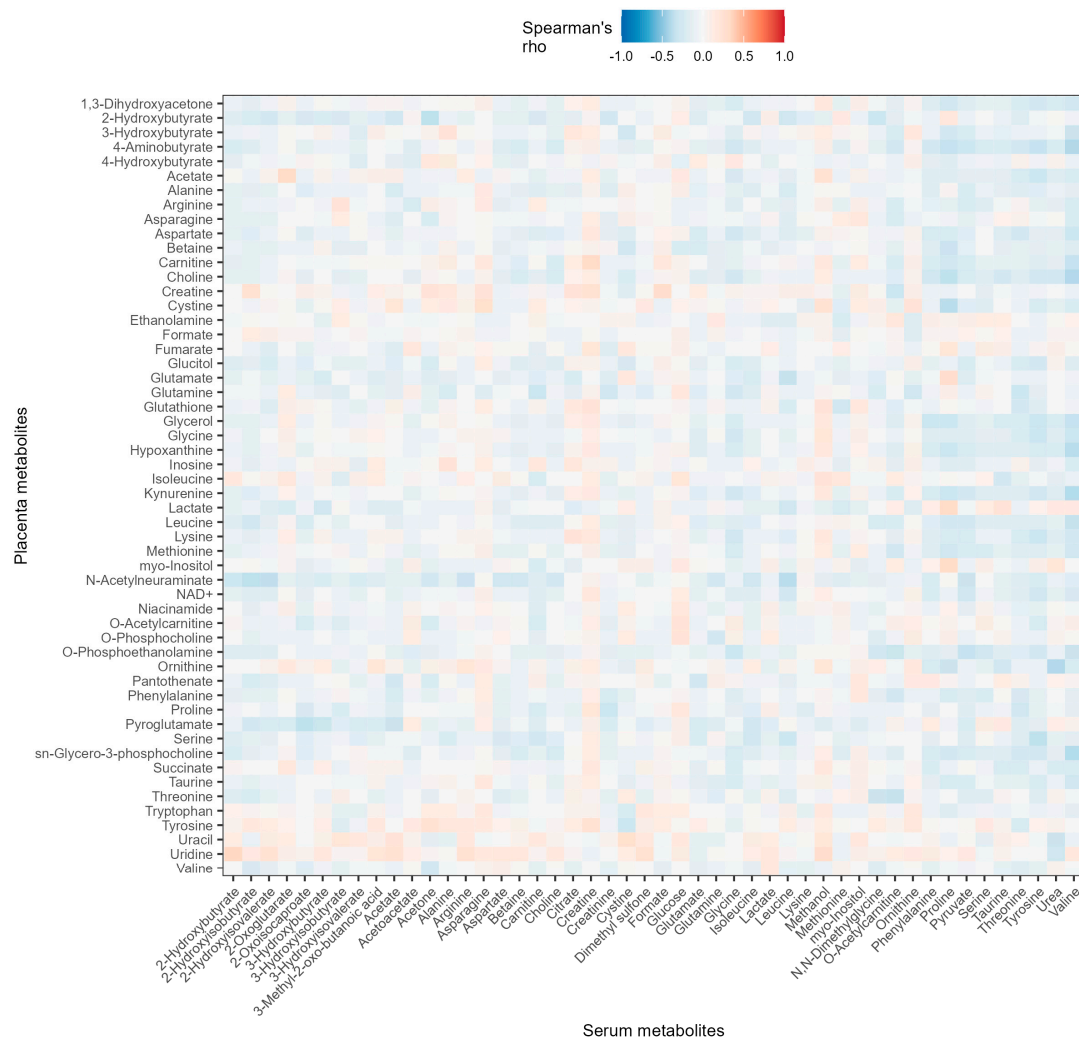

**Figure S1.** Spearman correlations between placental metabolites and serum metabolites. Positive associations (red) identify metabolites where higher placental metabolite concentrations correlated with higher serum metabolite concentrations, while negative associations (blue) identify metabolites where higher placental metabolite concentrations correlated with lower serum metabolite concentrations. No correlations remained significant after correction for false discovery rate.

A

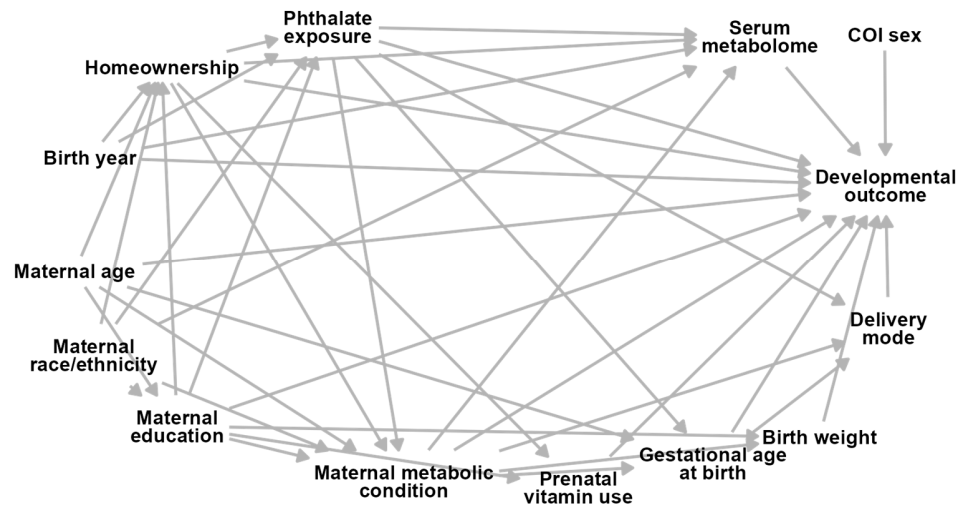

B

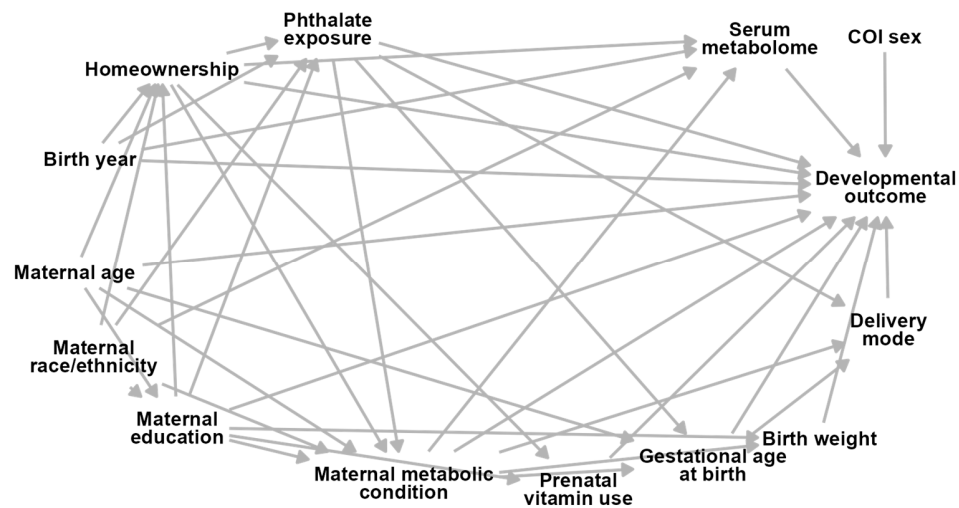

**Figure S2.** Directed acyclic graphs (DAGs) for the association between phthalate exposure, the serum metabolome, and neurodevelopmental outcomes. The DAG in (A) was used to evaluate the association between phthalate exposure and the serum metabolome and the DAG in (B), where the relationship between phthalate exposure and the serum metabolome was removed, was used to evaluate the association between the serum metabolome and neurodevelopmental outcome. COI = child of interest.

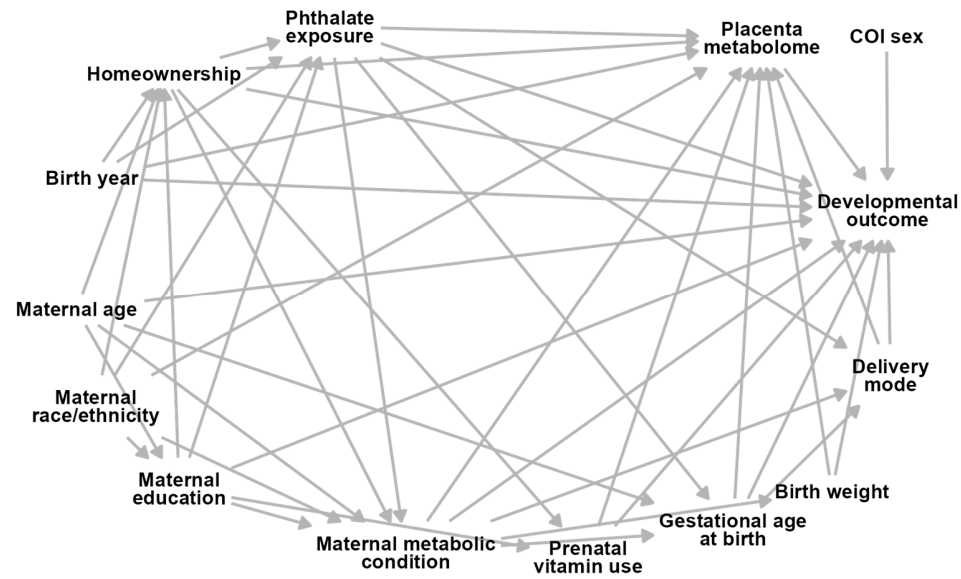

**Figure S3.** Directed acyclic graph (DAG) for the association between phthalate exposure, the placental metabolome, and neurodevelopmental outcomes. The DAG was used to evaluate the association between phthalate exposure and the placental metabolome and the association between the placental metabolome and neurodevelopmental outcome. COI = child of interest.
